# Supplementary material for: Regioselective halogenation of 2-substituted-1,2,3-triazoles via sp2 C–H activation
Source: Royal Society of Chemistry journal article supplement (doi:10.1039/c3ob41558a), 2013-01-01

---

# Regioective Halogenation of 2-Substituted-1,2,3-Triazole via $sp^2$ C-H Activation

Qingshan Tian,<sup>†</sup> Xianmin Chen,<sup>†</sup> Wei Liu,<sup>†</sup> Zechao Wang,<sup>†</sup> Suping Shi,<sup>†</sup>  
Chunxiang Kuang,<sup>\*,†</sup>

Department of Chemistry, Tongji University, Siping Road 1239, Shanghai 200092, China,  
and Key Laboratory of Yangtze River Water Environment, Ministry of Education, Siping Road 1239,  
Shanghai 200092, China

E-mail: kuangcx@tongji.edu.cn

## Supporting Information

### Table of Contents

|                                                                                                               |      |
|---------------------------------------------------------------------------------------------------------------|------|
| General Experimental Details.....                                                                             | S-1  |
| The synthesis of 2-Substituted-1,2,3- Triazoles.....                                                          | S-2  |
| General Procedure for Palladium-catalyzed Halogenation of<br>2-Substitued-1,2,3-Triazoles.....                | S-4  |
| General Procedure for Palladium-catalyzed Halogenation 2-Substituted-<br>1,2,3-triazole <i>N</i> -oxides..... | S-11 |
| General Procedure for deoxygenation of 1,2,3-triazole <i>N</i> -oxides.....                                   | S-12 |
| General Procedure for the synthesis of compound 7 .....                                                       | S-12 |
| NMR Spectra of the compounds .....                                                                            | S-15 |

### General Experimental Details:

All manipulations were carried out under argon using standard Schlenk techniques. All glassware was oven or flame dried immediately prior to use. All solvents were purified and dried according to standard methods prior to use, unless stated otherwise.

All reagents were obtained from commercial sources and used without further purification. <sup>1</sup>H NMR spectra were obtained at 400 MHz and recorded relative to the tetramethylsilane signal (0 ppm) or residual protio-solvent. <sup>13</sup>C NMR spectra were obtained at 100 MHz, and chemical shifts were recorded relative to the solvent resonance (CDCl<sub>3</sub>, 77.0 ppm). Data for <sup>1</sup>H NMR are recorded as follows: chemical shift (δ, ppm), multiplicity (s = singlet, d = doublet, t = triplet, q = quartet, m =

multiplet or unresolved, br = broad singlet, coupling constant(s) in Hz, integration).  
Data for  $^{13}\text{C}$  NMR are reported in terms of chemical shift ( $\delta$ , ppm).

2-Substituted-1,2,3-Triazoles were prepared according to known procedures (Scheme 1).<sup>1</sup>

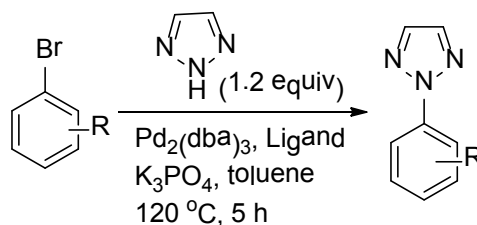

Reference:

1. S. Ueda, M. J. Su, S. L. Buchwald, *Angew. Chem.Int. Ed.*, 2011, **50**, 8944-8947.

### Spectral Data of Starting Materials (1a–k)

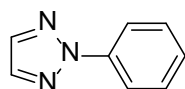

**2-phenyl-2H-1,2,3-triazole (1a):** Yield: 89%, colourless oil.  $^1\text{H}$  NMR (400 MHz,  $\text{CDCl}_3$ )  $\delta$  8.11 (d,  $J = 7.8$  Hz, 2H), 7.84 (s, 2H), 7.51 (t,  $J = 7.9$  Hz, 2H), 7.38 (t,  $J = 7.4$  Hz, 1H).  $^{13}\text{C}$  NMR (100 MHz,  $\text{CDCl}_3$ )  $\delta$  140.0, 135.86, 129.44, 128.50, 123.08, 120.00. HR-MS:  $m/z$  calcd for  $\text{C}_8\text{H}_7\text{N}_3$ :145.0640; found: 145.0641. IR:  $\text{max}$ (thin film) ( $\text{cm}^{-1}$ )=3125, 3058, 2362, 1747, 1599, 1550, 1410, 1372, 1258, 1150, 1070, 953, 820, 759, 690, 667, 500, 455.

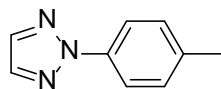

**2-(p-tolyl)-2H-1,2,3-triazole (1b):** Yield: 85%, brown solide, mp. 55.2–55.4°C.  $^1\text{H}$  NMR (400 MHz,  $\text{CDCl}_3$ )  $\delta$  7.98 (d,  $J = 8.5$  Hz, 2H), 7.82 (s, 2H), 7.36 – 7.23 (m, 2H), 2.43 (s, 3H).  $^{13}\text{C}$  NMR (100 MHz,  $\text{CDCl}_3$ )  $\delta$  140.2, 137.86, 135.5, 129.44, 123.00, 21.54. HR-MS:  $m/z$  calcd for  $\text{C}_9\text{H}_9\text{N}_3$ :159.0796; found: 159.0797. IR:  $\text{max}$ (thin film) ( $\text{cm}^{-1}$ )=3135, 3048, 2969, 1747, 1599, 1514, 1461, 1381, 1259, 1151, 1070, 951, 817, 759, 690, 667, 500, 455.

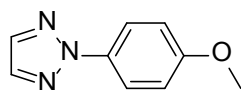

**2-(4-methoxyphenyl)-2H-1,2,3-triazole (1c):** Yield: 89%, colorless oil.  $^1\text{H}$  NMR (400 MHz,  $\text{CDCl}_3$ )  $\delta$  8.01 (d,  $J = 9.1$  Hz, 2H), 7.80 (s, 2H), 7.02 (d,  $J = 9.1$  Hz, 2H), 3.88 (s, 4H).  $^{13}\text{C}$  NMR (100 MHz,  $\text{CDCl}_3$ )  $\delta$  159.0, 135.26, 133.44, 120.10, 114.48, 55.59. HR-MS:  $m/z$  calcd for  $\text{C}_9\text{H}_9\text{N}_3\text{O}$ :175.0746; found: 175.0745. IR:  $\text{max}$ (thin film) ( $\text{cm}^{-1}$ )=3740, 3010, 2362, 1513, 1450, 1412, 1308, 1170, 1060, 953, 820, 677, 500.

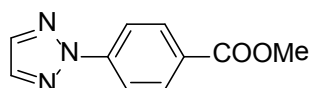

**Methyl 4-(2H-1,2,3-triazol-2-yl)benzoate (1d):** Yield: 80%, white solid, mp. 100-102 °C.  $^1\text{H}$  NMR (400 MHz,  $\text{CDCl}_3$ )  $\delta$  8.43 (d,  $J = 8.3$  Hz, 2H), 8.13 (d,  $J = 8.3$  Hz, 2H), 7.95 (s, 2H), 3.99 (s, 3H).

$^{13}\text{C}$  NMR (100 MHz,  $\text{CDCl}_3$ )  $\delta$  168.40, 140.1, 135.86, 129.44, 128.50, 123.08, 52.55. HR-MS:  $m/z$  calcd for  $\text{C}_{10}\text{H}_9\text{N}_3\text{O}_2$ :203.0695; found: 203.0695. IR: $_{\text{max}}$ (thin film) ( $\text{cm}^{-1}$ )=3120, 3021, 2359, 1851, 1740, 1599, 1550, 1460, 1379, 1301, 1250, 1070, 820, 759, 667.

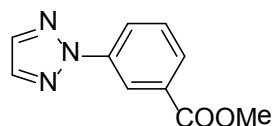

**Methyl 3-(2H-1,2,3-triazole-2-yl)benzoate (1e):** Yield: 80%, white solid, mp. 89.5 °C.  $^1\text{H}$  NMR (400 MHz,  $\text{CDCl}_3$ )  $\delta$  8.78 (s, 1H), 8.31 dd,  $J = 8.1, 1.1$  Hz, 1H), 8.06 (d,  $J = 7.8$  Hz, 1H), 7.87 (s, 2H), 7.60 (t,  $J = 8.0$  Hz, 1H), 3.99 (s, 3H).  $^{13}\text{C}$  NMR (100 MHz,  $\text{CDCl}_3$ )  $\delta$  135.86, 129.44, 128.50, 123.08, 120.00, 52.35. HR-MS:  $m/z$  calcd for  $\text{C}_{10}\text{H}_9\text{N}_3\text{O}_2$ :203.0695; found: 203.0695. IR: $_{\text{max}}$ (thin film) ( $\text{cm}^{-1}$ )=3120, 3021, 2359, 1851, 1740, 1599, 1550, 1460, 1379, 1301, 1250, 1070, 820, 759, 667.

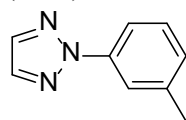

**2-(m-tolyl)-2H-1,2,3-triazole (1f):** Yield: 86%, colorless oil.  $^1\text{H}$  NMR (400 MHz,  $\text{CDCl}_3$ )  $\delta$  7.94 (s, 1H), 7.90 (d,  $J = 8.2$  Hz, 1H), 7.83 (s, 2H), 7.39 (t,  $J = 7.8$  Hz, 1H), 7.19 (d,  $J = 7.5$  Hz, 1H), 2.47 (s, 3H).  $^{13}\text{C}$  NMR (100 MHz,  $\text{CDCl}_3$ )  $\delta$  139.34, 135.59, 135.34, 129.10, 128.31, 119.54, 116.14, 21.44.

HR-MS:  $m/z$  calcd for  $\text{C}_9\text{H}_9\text{N}_3$ : 159.0796; found: 159.0797. IR: $_{\text{max}}$ (thin film) ( $\text{cm}^{-1}$ )=3131, 2970, 1748, 1605, 1524, 1463, 1380, 1261, 1150, 1070, 951, 817, 759, 690, 667, 500.

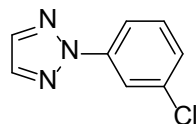

**2-(3-chlorophenyl)-2H-1,2,3-triazole (1g):** Yield: 88%, white solid, mp. 45-46 °C.  $^1\text{H}$  NMR (400 MHz,  $\text{CDCl}_3$ )  $\delta$  8.15 (t,  $J = 1.8$  Hz, 1H), 8.01 (dd,  $J = 8.1, 0.9$  Hz, 1H), 7.85 (s, 2H), 7.44 (t,  $J = 8.1$  Hz, 1H), 7.35 (dd,  $J = 8.0, 0.8$  Hz, 1H).  $^{13}\text{C}$  NMR (100 MHz,  $\text{CDCl}_3$ )  $\delta$  140.66, 135.93, 135.17, 130.37, 127.55, 119.30, 116.98. HR-MS:  $m/z$  calcd for  $\text{C}_8\text{H}_6^{35}\text{ClFN}_3\text{O}$ :179.0250; found: 179.0248. IR: $_{\text{max}}$ (thin film) ( $\text{cm}^{-1}$ )=3747, 3080, 2366, 1590, 1488, 1440, 1376, 1260, 1153, 1105, 1074, 950, 869, 826, 778, 666, 488.

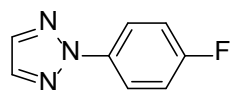

**2-(4-fluorophenyl)-2H-1,2,3-triazole (1h):** Yield: 82%, white solid, mp. 57 °C.  $^1\text{H}$  NMR (400 MHz,  $\text{CDCl}_3$ )  $\delta$  8.14-8.03 (m, 2H), 7.83 (s, 2H), 7.20 (t,  $J = 8.6$  Hz, 2H).  $^{13}\text{C}$  NMR (100 MHz,  $\text{CDCl}_3$ )  $\delta$  163.08, 160.63, 135.57, 120.77, 120.73, 116.25, 116.01. HR-MS:  $m/z$  calcd for  $\text{C}_8\text{H}_6\text{FN}_3$ : 163.0546; found: 163.0547. IR: $_{\text{max}}$ (thin film) ( $\text{cm}^{-1}$ )=3547, 3097, 2356, 1590, 1488, 1440, 1376, 1260, 1153, 1105, 1074, 950, 869, 826, 778, 666, 488.

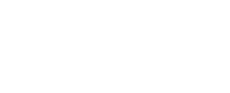

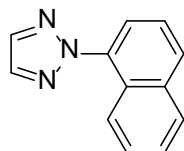

**2-(1-naphthalenyl)-2H-1,2,3-triazole (1i):** Yield: 78%, white solid, mp. 110 °C. <sup>1</sup>H NMR (400 MHz, CDCl<sub>3</sub>) δ 8.15 (dd, *J* = 6.2, 3.4 Hz, 1H), 8.05-7.93 (m, 4H), 7.82 (d, *J* = 7.4 Hz, 1H), 7.64 – 7.52 (m, 3H). <sup>13</sup>C NMR (100 MHz, CDCl<sub>3</sub>) δ 140.65, 136.17, 135.93, 135.17, 131.00, 130.38, 127.55, 120.81, 119.29, 118.02, 116.97. HR-MS: *m/z* calcd for C<sub>12</sub>H<sub>9</sub>N<sub>3</sub>:195.0796; found: 195.0795. IR: <sub>max</sub>(thin film) (cm<sup>-1</sup>)= 3424, 3230, 2350, 1615, 1488, 1440, 1376, 1260, 1153, 1105, 1074, 950, 869, 826, 778, 615.

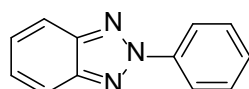

**2-phenyl-2H-benzo[d]-1,2,3-triazole (1j):** Yield: 70%, yellow solid, mp. 109-110 °C. <sup>1</sup>H NMR (400 MHz, CDCl<sub>3</sub>) δ 8.39 (d, *J* = 7.6 Hz, 2H), 7.97 (dd, *J* = 6.6, 3.1 Hz, 2H), 7.59 (t, *J* = 7.8 Hz, 2H), 7.52 – 7.41 (m, 3H). <sup>13</sup>C NMR (100 MHz, CDCl<sub>3</sub>) δ 145.05, 140.39, 129.43, 128.98, 127.18, 120.66, 118.41. HR-MS: *m/z* calcd for C<sub>12</sub>H<sub>9</sub>N<sub>3</sub>:195.0796; found: 195.0795. IR: <sub>max</sub>(thin film) (cm<sup>-1</sup>)= 3421, 3233, 1615, 1488, 1440, 1376, 1260, 1153, 1105, 1074, 950, 869, 826, 778, 615.

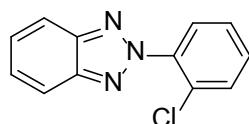

**2-(2-chlorophenyl)-2H-benzo[d]-1,2,3-triazole (1k):** Yield: 71%, yellow solid, mp. 51-52 °C. <sup>1</sup>H NMR (500 MHz, CDCl<sub>3</sub>) δ 7.99 (dd, *J* = 6.6, 3.1 Hz, 2H), 7.76 – 7.69 (m, 1H), 7.65-7.60 (m, 1H), 7.47 (qd, *J* = 7.3, 3.0 Hz, 4H). <sup>13</sup>C NMR (100 MHz, CDCl<sub>3</sub>) δ 144.92, 138.76, 131.02, 130.81, 129.75, 128.22, 127.43, 127.35, 118.52. HR-MS: *m/z* calcd for C<sub>12</sub>H<sub>8</sub>ClN<sub>3</sub>:229.0407; found: 229.0408. IR: <sub>max</sub>(thin film) (cm<sup>-1</sup>)= 3421, 3233, 1615, 1488, 1440, 1376, 1260, 1153, 1105, 1074, 950, 869, 826, 778, 615.

Reference:

1. F. Chevallier, T. Blin, E. Nagaradja, F. Lassagne, T. Roisnel, Y. S. Halauko, V. E. Matulis, O. A. Ivashkevich, F. Mongin, *Org. Biomol. Chem.*, 2012, **10**, 4878.
2. S. Ueda, M. J. Su, S. L. Buchwald, *Angew. Chem.Int. Ed.* 2011, **50**, 8944.

### General Procedure for Palladium-catalyzed Halogenation of 2-Substituted -1,2,3-Triazoles:

A mixture of 2-Substituted-1,2,3-Triazole (**1**) (0.5 mmol), NXS (0.55mmol), Pd(AcO)<sub>2</sub> (0.025 mmol) and PivOH (0.25 mmol) in toluene (2 ml) was stirred at 100 °C for 18 h in sealed tube. The mixture was diluted with EtOAc (10 ml) and washed with 15% aqueous NaOH solution (10 ml\*3). The organic phase was dried over anhydrous Na<sub>2</sub>SO<sub>4</sub>, filtered and concentrated under reduced pressure. The resulting residue was purified on silica gel chromatography (EtOAc/ hexane=1/25) to give the products.

## Spectral Data of Products (2a–l)

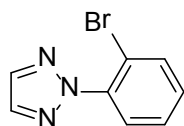

**2-(2-bromophenyl)-2H-1,2,3-triazole (2a):** colourless oil.  $^1\text{H}$  NMR (400 MHz,  $\text{CDCl}_3$ )  $\delta$  7.89 (s, 2H), 7.74 (dd,  $J = 8.0, 1.1$  Hz, 1H), 7.55 (dd,  $J = 7.9, 1.5$  Hz, 1H), 7.44 (td,  $J = 7.8, 1.2$  Hz, 1H), 7.33 (td,  $J = 7.9, 1.6$  Hz, 1H).  $^{13}\text{C}$  NMR (100 MHz,  $\text{CDCl}_3$ )  $\delta$  139.76, 135.59, 134.10, 132.45, 130.64, 128.09, 128.11, 118.85. HR-MS:  $m/z$  calcd for  $\text{C}_8\text{H}_6\text{BrN}_3$ : 222.9745; found: 222.9746. IR: $_{\text{max}}$ (thin film) ( $\text{cm}^{-1}$ )=3130, 3046, 2361, 1753, 1601, 1551, 1410, 1289, 1070, 953, 820, 690, 667, 510.

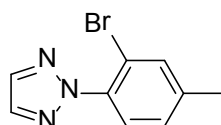

**2-(2-bromo-4-methylphenyl)-2H-1,2,3-triazole (2b):** White solid, mp.  $93^\circ\text{C}$ .  $^1\text{H}$  NMR (400 MHz,  $\text{CDCl}_3$ )  $\delta$  7.89 (s, 2H), 7.59 (s, 1H), 7.44 (d,  $J = 8.1$  Hz, 1H), 7.26 (d,  $J = 8.1$  Hz, 1H), 2.44 (s, 3H).  $^{13}\text{C}$  NMR (100 MHz,  $\text{CDCl}_3$ )  $\delta$  141.25, 135.62, 135.38, 134.32, 132.89, 128.73, 127.72, 20.93. HR-MS:  $m/z$  calcd for  $\text{C}_9\text{H}_8\text{BrN}_3$ : 236.9902; found: 236.9903. IR: $_{\text{max}}$ (thin film) ( $\text{cm}^{-1}$ ) =3230, 3003, 1751, 1600, 1540, 1454, 1386, 1300, 1154, 1066, 817, 688.

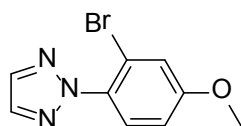

**2-(2-bromo-4-methoxyphenyl)-2H-1,2,3-triazole (2c):** white solid, mp.  $105.5^\circ\text{C}$ .  $^1\text{H}$  NMR (400 MHz,  $\text{CDCl}_3$ )  $\delta$  7.88 (s, 2H), 7.46 (d,  $J = 8.8$  Hz, 1H), 7.27 (d,  $J = 2.7$  Hz, 1H), 6.98 (dd,  $J = 8.8, 2.7$  Hz, 1H), 3.88 (s, 3H).  $^{13}\text{C}$  NMR (100 MHz,  $\text{CDCl}_3$ )  $\delta$  160.54, 135.27, 133.20, 128.80, 119.96, 118.74, 113.73, 55.89. HR-MS:  $m/z$  calcd for  $\text{C}_9\text{H}_8\text{BrN}_3\text{O}$ : 252.9851; found: 252.9853. IR: $_{\text{max}}$ (thin film) ( $\text{cm}^{-1}$ )=3747, 3016, 2352, 1543, 1459, 1422, 1318, 1169, 1068, 955, 825, 540.

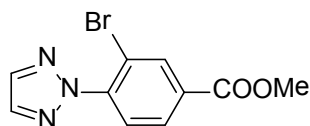

**Methyl 4-bromo-3-(2H-1,2,3-triazol-2-yl)benzoate (2d):** white solid, mp.  $112.5^\circ\text{C}$ .  $^1\text{H}$  NMR (400 MHz,  $\text{CDCl}_3$ )  $\delta$  8.46 (d,  $J = 1.3$  Hz, 1H), 8.13 (dd,  $J = 8.3, 1.4$  Hz, 1H), 7.95 (s, 2H), 7.71 (d,  $J = 8.3$  Hz, 1H), 4.00 (s, 3H).  $^{13}\text{C}$  NMR (100 MHz,  $\text{CDCl}_3$ )  $\delta$  165.04, 136.19, 132.59, 131.57, 128.94, 128.59, 127.26, 52.72. HR-MS:  $m/z$  calcd for  $\text{C}_{10}\text{H}_8\text{BrN}_3\text{O}_2$ : 280.9800; found: 280.9800. IR: $_{\text{max}}$ (thin film) ( $\text{cm}^{-1}$ )=3130, 3121, 2360, 1851, 1733, 1599, 1550, 1460, 1379, 1301, 1250, 1070, 820, 759, 667.

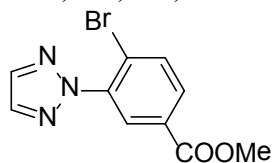

**Methyl 4-bromo-3-(2H-1,2,3-triazol-2-yl)benzoate (2e):** white solid, mp.  $98.5^\circ\text{C}$ .  $^1\text{H}$  NMR (400

MHz, CDCl<sub>3</sub>) δ 8.14 (d, *J* = 8.3 Hz, 2H), 7.94 (s, 2H), 7.86 (d, *J* = 8.3 Hz, 1H), 3.96 (s, 3H). <sup>13</sup>C NMR (100 MHz, CDCl<sub>3</sub>) δ 165.04, 136.19, 132.59, 131.57, 128.94, 128.59, 127.26, 52.72. HR-MS: *m/z* calcd for C<sub>10</sub>H<sub>8</sub>BrN<sub>3</sub>O<sub>2</sub>: 280.9800; found: 280.9800. IR: <sub>max</sub>(thin film) (cm<sup>-1</sup>)=3130, 3121, 2360, 1851, 1733, 1599, 1550, 1460, 1379, 1301, 1250, 1070, 820, 759, 667.

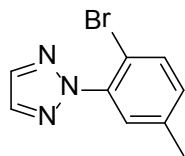

**2-(2-bromo-5-methylphenyl)-2H-1,2,3-triazole (2f):** colorless oil. <sup>1</sup>H NMR (400 MHz, CDCl<sub>3</sub>) δ 7.90 (s, 2H), 7.63 (d, *J* = 8.2 Hz, 1H), 7.38 (d, *J* = 12.2 Hz, 1H), 7.18 (dd, *J* = 8.2, 1.3 Hz, 1H), 2.39 (s, 3H). <sup>13</sup>C NMR (100 MHz, CDCl<sub>3</sub>) δ 139.41, 138.54, 135.46, 133.70, 131.47, 128.68, 115.25, 20.76.

HR-MS: *m/z* calcd for C<sub>9</sub>H<sub>8</sub>BrN<sub>3</sub>: 236.9902; found: 236.9904. IR: <sub>max</sub>(thin film) (cm<sup>-1</sup>)=3100, 2989, 1755, 1613, 1539, 1454, 1378, 1255, 1154, 1066, 817, 691.

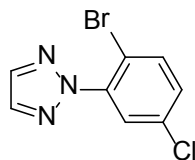

**2-(2-bromo-5-chlorophenyl)-2H-1,2,3-triazole (2g):** white solid, mp. 108 °C. <sup>1</sup>H NMR (400 MHz, CDCl<sub>3</sub>) δ 7.92 (s, 2H), 7.70 (d, *J* = 8.6 Hz, 1H), 7.62 (d, *J* = 2.3 Hz, 1H), 7.35 (dd, *J* = 8.6, 2.3 Hz, 1H). <sup>13</sup>C NMR (100 MHz, CDCl<sub>3</sub>) δ 140.30, 135.95, 135.03, 133.88, 130.53, 128.14, 116.40. HR-MS: *m/z* calcd for C<sub>8</sub>H<sub>5</sub>ClN<sub>3</sub>: 256.9355; found: 256.9354. IR: <sub>max</sub>(thin film) (cm<sup>-1</sup>)=3730, 3100, 2356, 1590, 1490, 1434, 1377, 1260, 1153, 1108, 1074, 869, 780, 660.

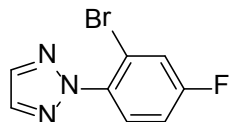

**2-(2-bromo-4-fluorophenyl)-2H-1,2,3-triazole (2h):** white solid, mp. 81 °C. <sup>1</sup>H NMR (400 MHz, CDCl<sub>3</sub>) δ 7.91 (s, 2H), 7.54 (m, 2H), 7.20 (m, 1H). <sup>13</sup>C NMR (100 MHz, CDCl<sub>3</sub>) δ 163.55, 161.02, 135.65, 129.31, 121.32, 121.06, 115.32, 115.09. HR-MS: *m/z* calcd for C<sub>8</sub>H<sub>5</sub>BrFN<sub>3</sub>: 240.9651; found: 240.9651. IR: <sub>max</sub>(thin film) (cm<sup>-1</sup>)=3490, 3100, 2356, 1590, 1488, 1440, 1376, 1260, 1153, 1105, 950, 826, 778.

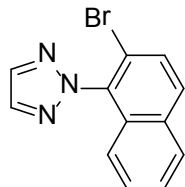

**1-(2-bromo-naphthanenyl)-2H-1,2,3-triazole (2i):** white solid, mp. 79 °C. <sup>1</sup>H NMR (400 MHz, CDCl<sub>3</sub>) δ 8.06 (s, 2H), 7.94 (dd, *J* = 8.5, 3.1 Hz, 2H), 7.78 (d, *J* = 8.8 Hz, 1H), 7.59 (t, *J* = 7.0 Hz, 1H), 7.51 (t, *J* = 7.2 Hz, 1H), 7.03 (d, *J* = 8.4 Hz, 1H). <sup>13</sup>C NMR (100 MHz, CDCl<sub>3</sub>) δ 140.65, 136.17, 135.93, 135.17, 131.00, 130.38, 127.55, 120.81, 119.29, 118.02, 116.97. HR-MS: *m/z* calcd for C<sub>12</sub>H<sub>8</sub>BrN<sub>3</sub>: 272.9902; found: 272.9903. IR: <sub>max</sub>(thin film) (cm<sup>-1</sup>)= 3420, 3229, 2366, 1610, 1490, 1445, 1380, 1260, 1150, 1105, 950, 826, 778, 615.

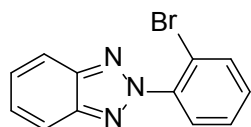

**2-(2-bromophenyl)-2H-benzo[d]-1,2,3-triazole (2j):** yellow solid, mp 74-75°C.  $^1\text{H}$  NMR (500 MHz,  $\text{CDCl}_3$ )  $\delta$  8.02 – 7.94 (m, 2H), 7.79 (dd,  $J$  = 8.0, 1.1 Hz, 1H), 7.68 (dd,  $J$  = 7.9, 1.5 Hz, 1H), 7.53 – 7.36 (m, 4H).  $^{13}\text{C}$  NMR (100 MHz,  $\text{CDCl}_3$ )  $\delta$  144.81, 140.38, 134.05, 131.07, 128.40, 128.00, 127.22, 118.80, 118.49. HR-MS:  $m/z$  calcd for  $\text{C}_{12}\text{H}_8\text{BrN}_3$ : 272.9902; found: 272.9903. IR: $_{\text{max}}$ (thin film) ( $\text{cm}^{-1}$ ) = 3408, 3233, 1615, 1488, 1440, 1376, 1260, 1153, 1105, 1074, 950, 869, 826, 778, 615.

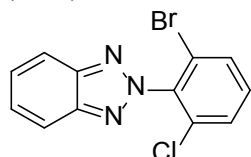

**2-(2-bromo-6-chlorophenyl)-2H-benzo[d]-1,2,3-triazole (2k):** white solid, mp 113-114°C.  $^1\text{H}$  NMR (400 MHz,  $\text{CDCl}_3$ )  $\delta$  8.11 – 7.90 (m, 3H), 7.77 (dd,  $J$  = 7.2, 6.2 Hz, 1H), 7.53 (dd,  $J$  = 6.6, 3.0 Hz, 2H), 7.18 (t,  $J$  = 8.0 Hz, 1H).  $^{13}\text{C}$  NMR (100 MHz,  $\text{CDCl}_3$ )  $\delta$  144.87, 143.27, 139.51, 138.65, 133.29, 132.78, 132.47, 127.51, 122.79, 121.79, 118.84, 96.35. HR-MS:  $m/z$  calcd for  $\text{C}_{12}\text{H}_7\text{BrClN}_3\text{O}$ : 306.9512; found: 306.9514. IR: $_{\text{max}}$ (thin film) ( $\text{cm}^{-1}$ ) = 3414, 3236, 1615, 1488, 1440, 1376, 1260, 1153, 1105, 1074, 950, 869, 826, 778, 618.

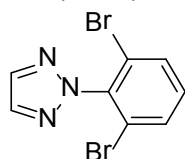

**2-(2-bromo-6-bromophenyl)-2H-benzo[d]-1,2,3-triazole (2l):** white solid, mp 100°C.  $^1\text{H}$  NMR (400 MHz,  $\text{CDCl}_3$ )  $\delta$  7.96 (s, 2H), 7.71 (d,  $J$  = 8.1 Hz, 2H), 7.32 – 7.28 (t,  $J$  = 8.1 Hz, 1H).  $^{13}\text{C}$  NMR (100 MHz,  $\text{CDCl}_3$ )  $\delta$  139.36, 135.75, 132.45, 132.29, 123.63. HR-MS:  $m/z$  calcd for  $\text{C}_8\text{H}_5\text{Br}_2\text{N}_3$ : 300.8850; found: 300.8853. IR: $_{\text{max}}$ (thin film) ( $\text{cm}^{-1}$ ) = 3414, 3236, 1615, 1488, 1440, 1376, 1260, 1153, 1105, 1074, 950, 869, 826, 778, 618.

### Spectral Data of Products (3a–i)

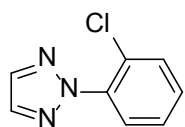

**2-(2-chlorophenyl)-2H-1,2,3-triazole (3a):** colourless oil.  $^1\text{H}$  NMR (400 MHz,  $\text{CDCl}_3$ )  $\delta$  7.90 (s, 2H), 7.63 – 7.54 (m, 2H), 7.45–7.37 (m, 2H).  $^{13}\text{C}$  NMR (100 MHz,  $\text{CDCl}_3$ )  $\delta$  135.64, 131.01, 130.24, 129.56, 127.75, 127.45. HR-MS:  $m/z$  calcd for  $\text{C}_8\text{H}_6\text{ClN}_3$ : 179.0250; found: 179.0251. IR: $_{\text{max}}$ (thin film) ( $\text{cm}^{-1}$ ) = 3144, 3037, 2360, 1751, 1601, 1551, 1402, 1308, 1070, 953, 820, 690, 522.

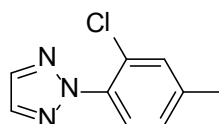

**2-(2-chloro-4-methylphenyl)-2H-1,2,3-triazole (3b):** colourless oil.  $^1\text{H}$  NMR (400 MHz,  $\text{CDCl}_3$ )  $\delta$  7.89 (s, 2H), 7.49 (d,  $J = 8.1$  Hz, 1H), 7.40 (s, 1H), 7.22 (d,  $J = 8.1$  Hz, 1H), 2.44 (s, 3H).  $^{13}\text{C}$  NMR (100 MHz,  $\text{CDCl}_3$ )  $\delta$  140.88, 135.44, 131.23, 129.16, 128.11, 127.40, 21.01. HR-MS:  $m/z$  calcd for  $\text{C}_9\text{H}_8\text{ClN}_3$ : 193.0407; found: 193.0408. IR:  $\text{max}$ (thin film) ( $\text{cm}^{-1}$ ) = 3230, 3003, 1751, 1600, 1540, 1454, 1386, 1300, 1154, 1066, 817, 688.

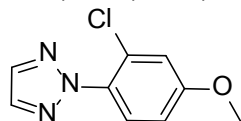

**2-(2-chloro-methoxyphenyl)-2H-1,2,3-triazole (3c):** colourless oil.  $^1\text{H}$  NMR (400 MHz,  $\text{CDCl}_3$ )  $\delta$  8.16 (d,  $J = 2.5$  Hz, 1H), 7.96 (dd,  $J = 8.9, 2.6$  Hz, 1H), 7.81 (s, 2H), 7.04 (d,  $J = 9.0$  Hz, 1H), 3.98 (s, 3H).  $^{13}\text{C}$  NMR (100 MHz,  $\text{CDCl}_3$ )  $\delta$  154.46, 135.68, 135.43, 121.30, 118.20, 112.11, 56.47. HR-MS:  $m/z$  calcd for  $\text{C}_9\text{H}_8\text{ClN}_3\text{O}$ : 209.0356; found: 209.0357. IR:  $\text{max}$ (thin film) ( $\text{cm}^{-1}$ ) = 3440, 3016, 2344, 1540, 1460, 1432, 1323, 1170, 1086, 955, 825, 550.

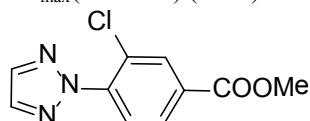

**Methyl 3-chloro-4-(2H-1,2,3-triazol-2-yl)benzoate (3d):** white solid, mp.  $97^\circ\text{C}$ .  $^1\text{H}$  NMR (400 MHz,  $\text{CDCl}_3$ )  $\delta$  8.26 (d,  $J = 1.6$  Hz, 1H), 8.07 (dd,  $J = 8.3, 1.7$  Hz, 1H), 7.93 (s, 2H), 7.75 (d,  $J = 8.3$  Hz, 1H), 3.97 (s, 3H).  $^{13}\text{C}$  NMR (100 MHz,  $\text{CDCl}_3$ )  $\delta$  165.04, 136.19, 132.59, 131.57, 128.94, 128.59, 127.26, 52.72. HR-MS:  $m/z$  calcd for  $\text{C}_{10}\text{H}_8\text{BrN}_3\text{O}_2$ : 280.9800; found: 280.9801. IR:  $\text{max}$ (thin film) ( $\text{cm}^{-1}$ ) = 3133, 2356, 1850, 1732, 1599, 1550, 1460, 1379, 1301, 1250, 1070, 820, 759, 668.

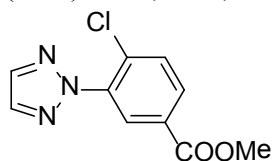

**Methyl 4-chloro-3-(2H-1,2,3-triazol-2-yl)benzoate (3e):** white solid, mp.  $84^\circ\text{C}$ .  $^1\text{H}$  NMR (400 MHz,  $\text{CDCl}_3$ )  $\delta$  8.31 (d,  $J = 1.8$  Hz, 1H), 8.10 (dd,  $J = 8.4, 1.8$  Hz, 1H), 7.94 (s, 2H), 7.68 (d,  $J = 8.4$  Hz, 1H), 3.96 (s, 3H).  $^{13}\text{C}$  NMR (100 MHz,  $\text{CDCl}_3$ )  $\delta$  165.04, 136.19, 132.59, 131.57, 128.94, 128.59, 127.26, 52.72. HR-MS:  $m/z$  calcd for  $\text{C}_{10}\text{H}_8\text{BrN}_3\text{O}_2$ : 280.9800; found: 280.9801. IR:  $\text{max}$ (thin film) ( $\text{cm}^{-1}$ ) = 3135, 2381, 1851, 1733, 1599, 1460, 1379, 1301, 1250, 1070, 820, 760.

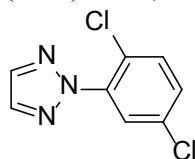

**2-(2,5-dichlorophenyl)-2H-1,2,3-triazole (3f):** white solid, mp.  $71^\circ\text{C}$ .  $^1\text{H}$  NMR (400 MHz,  $\text{CDCl}_3$ )  $\delta$  7.92 (s, 2H), 7.68 (d,  $J = 2.2$  Hz, 1H), 7.53 (d,  $J = 8.6$  Hz, 1H), 7.41 (dd,  $J = 8.6, 2.3$  Hz, 1H).  $^{13}\text{C}$  NMR (100 MHz,  $\text{CDCl}_3$ )  $\delta$  138.55, 136.05, 133.12, 131.97, 130.12, 127.60. HR-MS:  $m/z$  calcd for  $\text{C}_8\text{H}_5\text{Cl}_2\text{N}_3$ : 212.9861; found: 212.9862. IR:  $\text{max}$ (thin film) ( $\text{cm}^{-1}$ ) = 3650, 3210, 2210, 1590, 1490, 1434, 1377, 1260, 1153, 1108, 1074, 869, 7790, 664.

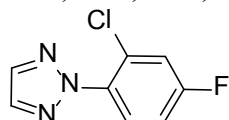

**2-(2-chloro-4-fluorophenyl)-2H-1,2,3-triazole (3g):** white solid, mp.  $73^\circ\text{C}$ .  $^1\text{H}$  NMR (400 MHz,  $\text{CDCl}_3$ )  $\delta$  7.91 (s, 2H), 7.60 (dd,  $J = 8.9, 5.4$  Hz, 1H), 7.34 (dd,  $J = 8.1, 2.7$  Hz, 1H), 7.21 – 7.09 (m,



1H).  $^{13}\text{C}$  NMR (100 MHz,  $\text{CDCl}_3$ )  $\delta$  140.88, 135.44, 131.23, 129.16, 128.11, 127.40. HR-MS:  $m/z$  calcd for  $\text{C}_8\text{H}_5\text{ClFN}_3$ : 197.0156; found: 197.0157. IR:  $\text{max}$ (thin film) ( $\text{cm}^{-1}$ )=3450, 3130, 2278, 1590, 1490, 1440, 1376, 1260, 1153, 1105, 950, 828, 787.

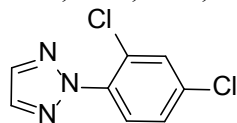

**2-(2,4-dichlorophenyl)-2H-1,2,3-triazole (3h):** white solid, mp. 61 °C.  $^1\text{H}$  NMR (400 MHz,  $\text{CDCl}_3$ )  $\delta$  7.92 (s, 2H), 7.60 (dd,  $J$  = 12.3, 5.3 Hz, 2H), 7.42 (dd,  $J$  = 8.6, 2.2 Hz, 1H).  $^{13}\text{C}$  NMR (100 MHz,  $\text{CDCl}_3$ )  $\delta$  135.90, 135.52, 130.85, 130.24, 128.36, 127.76. HR-MS:  $m/z$  calcd for  $\text{C}_8\text{H}_5\text{Cl}_2\text{N}_3$ : 212.9861; found: 212.9862. IR:  $\text{max}$ (thin film) ( $\text{cm}^{-1}$ )=3350, 3120, 2278, 1590, 1490, 1440, 1376, 1260, 1153, 1105, 949, 829, 779.

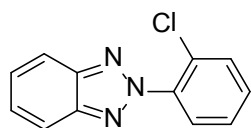

**2-(2-chlorophenyl)-2H-benzo[d]-1,2,3-triazole (3i):** yellow solid, mp 51-52 °C.  $^1\text{H}$  NMR (500 MHz,  $\text{CDCl}_3$ )  $\delta$  7.99 (dd,  $J$  = 6.6, 3.1 Hz, 2H), 7.76 – 7.69 (m, 1H), 7.65 – 7.60 (m, 1H), 7.47 (qd,  $J$  = 7.3, 3.0 Hz, 4H).  $^{13}\text{C}$  NMR (100 MHz,  $\text{CDCl}_3$ )  $\delta$  144.92, 138.76, 131.02, 130.81, 129.75, 128.22, 127.43, 127.35, 118.52. HR-MS:  $m/z$  calcd for  $\text{C}_{12}\text{H}_8\text{ClN}_3$ : 229.0407; found: 229.0408. IR:  $\text{max}$ (thin film) ( $\text{cm}^{-1}$ )= 3421, 3233, 1615, 1488, 1376, 1260, 115, 1074, 950, 869, 778, 615.

### Spectral Data of Products (4a–i)

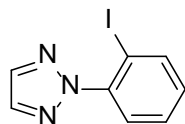

**2-(2-iodophenyl)-2H-1,2,3-triazole (4a):** Brown solid, mp. 63 °C.  $^1\text{H}$  NMR (400 MHz,  $\text{CDCl}_3$ )  $\delta$  7.89 (s, 2H), 7.85 (s, 1H), 7.38 (d,  $J$  = 8.0 Hz, 1H), 7.30 (s, 1H), 2.42 (s, 3H).  $^{13}\text{C}$  NMR (100 MHz,  $\text{CDCl}_3$ ) 141.3, 141.0, 139.8, 135.4, 129.5, 127.1, 93.8. HR-MS:  $m/z$  calcd for  $\text{C}_8\text{H}_6\text{IN}_3$ : 270.9606; found: 270.9606. IR:  $\text{max}$ (thin film) ( $\text{cm}^{-1}$ )=3044, 3037, 2360, 1751, 1601, 1551, 1402, 1308, 1070, 953, 820, 690, 522.

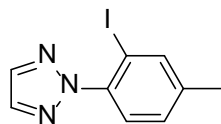

**2-(2-iodo-4-methylphenyl)-2H-1,2,3-triazole (4b):** Yellow solid, mp. 124 °C.  $^1\text{H}$  NMR (400 MHz,  $\text{CDCl}_3$ )  $\delta$  7.89 (s, 2H), 7.85 (s, 1H), 7.38 (d,  $J$  = 8.0 Hz, 1H), 7.30 (s, 1H), 2.42 (s, 3H).  $^{13}\text{C}$  NMR (100 MHz,  $\text{CDCl}_3$ ) 141.5, 141.0, 140.8, 135.5, 129.7, 127.4, 92.8, 20.8. HR-MS:  $m/z$  calcd for  $\text{C}_9\text{H}_8\text{IN}_3$ : 284.9763; found: 284.9764. IR:  $\text{max}$ (thin film) ( $\text{cm}^{-1}$ ) = 3139, 2956, 2922, 1600, 1514, 1498, 1411, 1251, 1150, 1024, 962, 951, 819, 757, 510.

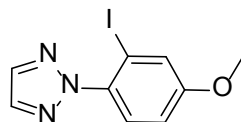

**2-(4-Methoxy-2-iodophenyl)-2H-1,2,3-triazole (4c):** Orange solid, mp. 92°C. <sup>1</sup>H NMR (400 MHz, CDCl<sub>3</sub>) δ 7.87 (s, 2H), 7.49 (d, *J* = 2.7 Hz, 1H), 7.38 (d, *J* = 8.8 Hz, 1H), 7.00 (dd, *J* = 8.8, 2.7 Hz, 1H), 3.87 (s, 3H). <sup>13</sup>C NMR (100 MHz, CDCl<sub>3</sub>) δ 160.33, 135.28, 128.25, 124.96, 114.46, 93.72, 55.87.

HR-MS: *m/z* calcd for C<sub>9</sub>H<sub>8</sub>IN<sub>3</sub>O: 300.9712; found: 300.9713. IR: <sub>max</sub>(thin film) (cm<sup>-1</sup>)=3445, 3023, 2345, 1599, 1540, 1460, 1432, 1323, 1170, 1086, 955, 838, 556.

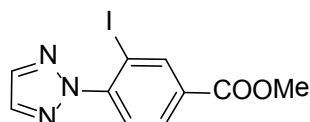

**Methyl 3-iodo-4-(2H-1,2,3-triazol-2-yl)benzoate (4d):** Yellow solid, mp. 89°C. <sup>1</sup>H NMR (400 MHz, CDCl<sub>3</sub>) δ 8.25 (d, *J* = 1.9 Hz, 1H), 8.02 (dd, *J* = 8.4, 1.9 Hz, 1H), 7.94 (s, 2H), 7.87 (d, *J* = 8.4 Hz, 1H), 3.96 (s, 3H). <sup>13</sup>C NMR (100 MHz, CDCl<sub>3</sub>) δ 164.72, 146.10, 142.06, 140.54, 136.03, 131.88, 130.06, 127.19, 90.94, 52.69. HR-MS: *m/z* calcd for C<sub>10</sub>H<sub>8</sub>IN<sub>3</sub>O<sub>2</sub>: 328.9661; found: 328.9662.

IR: <sub>max</sub>(thin film) (cm<sup>-1</sup>)=3100, 2361, 1850, 1732, 1599, 1550, 1460, 1379, 1301, 1250, 1070, 820, 759, 668, 550.

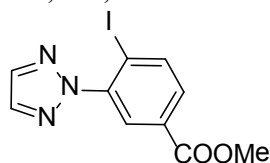

**Methyl 4-iodo-3-(2H-1,2,3-triazol-2-yl)benzoate (4e):** Yellow solid, mp. 81°C. <sup>1</sup>H NMR (400 MHz, CDCl<sub>3</sub>) δ 8.25 (d, *J* = 1.9 Hz, 1H), 8.02 (dd, *J* = 8.4, 1.9 Hz, 1H), 7.94 (s, 2H), 7.87 (d, *J* = 8.4 Hz, 1H), 3.96 (s, 3H). <sup>13</sup>C NMR (100 MHz, CDCl<sub>3</sub>) δ 165.21, 135.91, 134.44, 131.10, 130.45, 129.05, 124.04, 52.61. HR-MS: *m/z* calcd for C<sub>10</sub>H<sub>8</sub>IN<sub>3</sub>O<sub>2</sub>: 328.9661; found: 328.9662. IR: <sub>max</sub>(thin film) (cm<sup>-1</sup>)=3100, 2326, 1850, 1732, 1599, 1550, 1460, 1379, 1301, 1250, 1070, 820, 759, 668, 551.

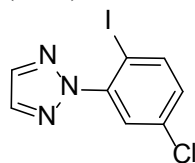

**2-(5-chloro-2-iodophenyl)-2H-1,2,3-triazole (4f):** Yellow solid, mp. 74°C. <sup>1</sup>H NMR (400 MHz, CDCl<sub>3</sub>) δ 7.97 – 7.85 (m, 3H), 7.54 (d, *J* = 2.4 Hz, 1H), 7.20 (dd, *J* = 8.5, 2.4 Hz, 1H). <sup>13</sup>C NMR (100 MHz, CDCl<sub>3</sub>) δ 162.33, 161.80, 139.76, 135.64, 134.68, 127.79, 127.46, 127.22, 116.18, 114.87, 93.19.

HR-MS: *m/z* calcd for C<sub>8</sub>H<sub>5</sub>ClIN<sub>3</sub>: 304.9217; found: 304.9218. IR: <sub>max</sub>(thin film) (cm<sup>-1</sup>)=3559, 3210, 2210, 1590, 1490, 1434, 1377, 1260, 1153, 1108, 1074, 869, 7790, 664.

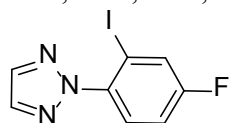

**2-(2-iodo-4-fluorophenyl)-2H-1,2,3-triazole (4g):** Yellow solid, mp. 65°C. <sup>1</sup>H NMR (400 MHz, CDCl<sub>3</sub>) δ 7.91 (s, 2H), 7.74 (dd, *J* = 7.7, 2.7 Hz, 1H), 7.48 (dd, *J* = 8.8, 5.2 Hz, 1H), 7.26 – 7.16 (m, 1H). <sup>13</sup>C NMR (100 MHz, CDCl<sub>3</sub>) δ 163.33, 160.80, 139.86, 135.94, 135.68, 128.79, 127.36, 127.12.

116.10, 115.87, 93.09. HR-MS:  $m/z$  calcd for  $C_8H_5FIN_3$ : 288.9512; found: 288.9513. IR: $_{max}$ (thin film) ( $cm^{-1}$ )=3350, 3110, 2283, 1590, 1490, 1376, 1260, 1153, 1105, 950, 828, 787.

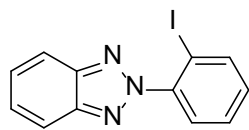

**2-(2-iodophenyl)-2H-benzo[d][1,2,3]triazole (4h):** Yellow solid, mp. 110°C.  $^1H$  NMR (500 MHz,  $CDCl_3$ )  $\delta$  8.06 (d,  $J$  = 8.0 Hz, 1H), 8.00 (dt,  $J$  = 5.6, 1.5 Hz, 2H), 7.62 (dd,  $J$  = 7.9, 1.2 Hz, 1H), 7.54 (t,  $J$  = 7.7 Hz, 1H), 7.48 (dt,  $J$  = 5.6, 1.5 Hz, 2H), 7.27 (ddd,  $J$  = 8.3, 6.5, 1.0 Hz, 1H).  $^{13}C$  NMR (100 MHz,  $CDCl_3$ )  $\delta$  144.90, 140.49, 131.25, 128.86, 128.00, 127.27, 118.59, 92.51. HR-MS:  $m/z$  calcd for  $C_{12}H_8IN_3$ : 320.9763; found: 320.9765. IR: $_{max}$ (thin film) ( $cm^{-1}$ )= 3402, 3236, 1615, 1488, 1376, 1260, 1105, 1074, 950, 869, 778, 615.

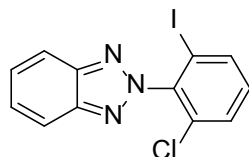

**2-(2-chloro-6-iodophenyl)-2H-benzo[d][1,2,3]triazole (4i):** Yellow solid, mp. 120°C.  $^1H$  NMR (400 MHz,  $CDCl_3$ )  $\delta$  8.11 – 7.86 (m, 3H), 7.65 – 7.44 (m, 3H), 7.32 – 7.17 (m, 1H).  $^{13}C$  NMR (100 MHz,  $CDCl_3$ )  $\delta$  144.92, 138.01, 132.53, 130.19, 127.52, 118.82, 96.5. HR-MS:  $m/z$  calcd for  $C_{12}H_7ClIN_3$ : 354.9373; found: 354.9375. IR: $_{max}$ (thin film) ( $cm^{-1}$ )= 3410, 3223, 1610, 1488, 1376, 1260, 1105, 1074, 950, 869, 778, 615.

### General Procedure for Palladium-catalyzed Halogenation 2-substituted-1,2,3-triazole *N*-Oxides

A mixture of  $N^2$ -Substituted-1,2,3-Triazole *N*-oxides (**1**) (0.5 mmol), NXS (0.55mmol),  $Pd(AcO)_2$  (0.025 mmol) and PivOH (0.25 mmol) in toluene (2 ml) was stirred at 120 °C for 18 h in sealed tube. The mixture was diluted with EtOAc (10 ml) and washed with 15% aqueous NaOH solution (10 ml\*3). The organic phase was dried over anhydrous  $Na_2SO_4$ , filtered and concentrated under reduced pressure. The resulting residue was purified on silica gel chromatography (EtOAc/hexane=1/10) to give the products (**6**).

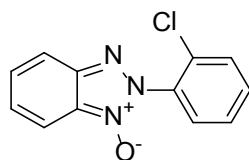

**2-(2-chlorophenyl)-2H-benzo[d][1,2,3]triazole 1-oxide (6a):** Brown solid, mp. 93°C.  $^1H$  NMR (400 MHz,  $CDCl_3$ )  $\delta$  7.84 (dd,  $J$  = 15.8, 8.8 Hz, 2H), 7.72 – 7.58 (m, 3H), 7.58 – 7.47 (m, 2H), 7.41 (dd,  $J$  = 7.9, 6.9 Hz, 1H).  $^{13}C$  NMR (100 MHz,  $CDCl_3$ )  $\delta$  142.14, 133.14, 132.82, 132.43, 130.81, 129.91, 129.36, 127.79, 126.56, 125.22, 119.44, 114.21. HR-MS:  $m/z$  calcd for  $C_{12}H_8ClN_3O$ : 245.0356; found: 245.0357. IR: $_{max}$ (thin film) ( $cm^{-1}$ )= 3410, 3240, 3064, 1634, 1615, 1507, 1479, 1460, 1394, 1318, 1163, 1105, 1074, 918, 869, 743, 615.

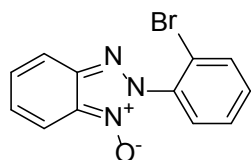

**2-(2-bromophenyl)-2H-benzo[d][1,2,3]triazole 1-oxide (6b):** Brown solid, mp. 91 °C. <sup>1</sup>H NMR (400 MHz, CDCl<sub>3</sub>) δ 7.84 (m, 3H), 7.57 (m, 4H), 7.46 – 7.36 (m, 1H). <sup>13</sup>C NMR (100 MHz, CDCl<sub>3</sub>) δ 142.03, 134.20, 133.90, 132.94, 130.12, 129.33, 128.40, 126.51, 125.21, 122.39, 119.45, 114.22. HR-MS: m/z calcd for C<sub>12</sub>H<sub>8</sub>BrN<sub>3</sub>O: 288.9851; found: 288.9852. IR: <sub>max</sub>(thin film) (cm<sup>-1</sup>)= 3408, 3233, 2916, 1640, 1615, 1507, 1479, 1460, 1394, 1318, 1163, 1105, 1074, 913, 743.

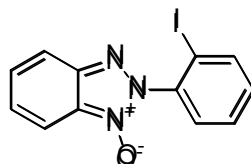

**2-(2-iodophenyl)-2H-benzo[d][1,2,3]triazole 1-oxide (6c):** Red brown solid, mp. 121 °C. <sup>1</sup>H NMR (400 MHz, CDCl<sub>3</sub>) δ 8.09 (d, *J* = 8.0 Hz, 1H), 7.85 (dd, *J* = 15.2, 8.8 Hz, 2H), 7.67 – 7.47 (m, 3H), 7.47 – 7.33 (m, 2H). <sup>13</sup>C NMR (100 MHz, CDCl<sub>3</sub>) δ 144.90, 143.94, 140.50, 131.31, 130.02, 128.91, 128.49, 127.87, 127.37, 126.79, 118.61, 118.41. HR-MS: m/z calcd for C<sub>12</sub>H<sub>8</sub>IN<sub>3</sub>O: 336.9712; found: 336.9713. IR: <sub>max</sub>(thin film) (cm<sup>-1</sup>)= 3410, 3233, 3016, 1640, 1560, 1507, 1479, 1460, 1394, 1318, 1163, 1105, 1074, 963, 778.

### General Procedure for deoxygenation of 1,2,3-triazole *N*-oxides :

2-substituted-1,2,3-triazole *N*-oxides (**6**) (0.3 mmol) was dissolved in dry CH<sub>2</sub>Cl<sub>2</sub> (10 ml) in and PBr<sub>3</sub> (50 mg, 0.36 mmol, 1.2 equiv.) added. The reaction mixture was heated at 60 °C for 1h. Under cooling in an ice bath the reaction mixture was basified with Na<sub>2</sub>CO<sub>3</sub>(aq) and the pH adjusted to 10-12 with 2M NaOH(aq). The mixture was extracted with CH<sub>2</sub>Cl<sub>2</sub> until the extract showed no product as judged by TLC. The combined organic layers were dried over Na<sub>2</sub>SO<sub>4</sub>, filtered and concentrated to give **3i**, **2j** and **4h** in high yield.

### General Procedure for the synthesis of compound **7** :

The mixture of **2b** (0.22 mmol) and CuCN (0.44 mmol) in DMF (2 ml) was heated at 120 °C for 12 h. The reaction was cooled to room temperature, water (10 ml) was added, the solution was extracted with CH<sub>2</sub>Cl<sub>2</sub> (5 ml\*3). The combined organic phases were washed with brine, dried over anhydrous Na<sub>2</sub>SO<sub>4</sub> and concentrated. The residue was used in next step without purification.

The product was heated in aq. NaOH solution (6 M, 3 ml) and EtOH (3 ml) for 6 h. The reaction mixture was cooled to room temperature, and acidified to PH 4-5 with diluted hydrochloride acid (6M aq.). The mixture was extracted with CH<sub>2</sub>Cl<sub>2</sub> (5 ml\*3). The combined organic phases were washed with brine, dried over anhydrous Na<sub>2</sub>SO<sub>4</sub> and concentrated. The residue was purified on silica gel (CH<sub>2</sub>Cl<sub>2</sub>/MeOH=20/1) to give a white solid (yield: 80% ).

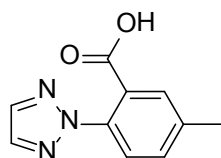

**5-methyl-2-(2H-1,2,3-triazol-2-yl)benzoic acid (7):** White solid, mp. 121 °C.  $^1\text{H}$  NMR (400 MHz,  $\text{CDCl}_3$ )  $\delta$  7.84 (s, 2H), 7.76 (s, 1H), 7.66 (d,  $J = 8.1$  Hz, 1H), 7.48 (d,  $J = 8.1$  Hz, 1H), 2.48 (s, 3H).

$^{13}\text{C}$  NMR (101 MHz,  $\text{CDCl}_3$ )  $\delta$  170.61, 139.19, 136.59, 135.59, 133.24, 131.30, 125.94, 125.24, 21.02.

HR-MS:  $m/z$  calcd for  $\text{C}_{10}\text{H}_9\text{N}_3\text{O}_2$ : 203.0695; found: 203.0696.

## SPECTRA

$1e^{-1}\text{H}$

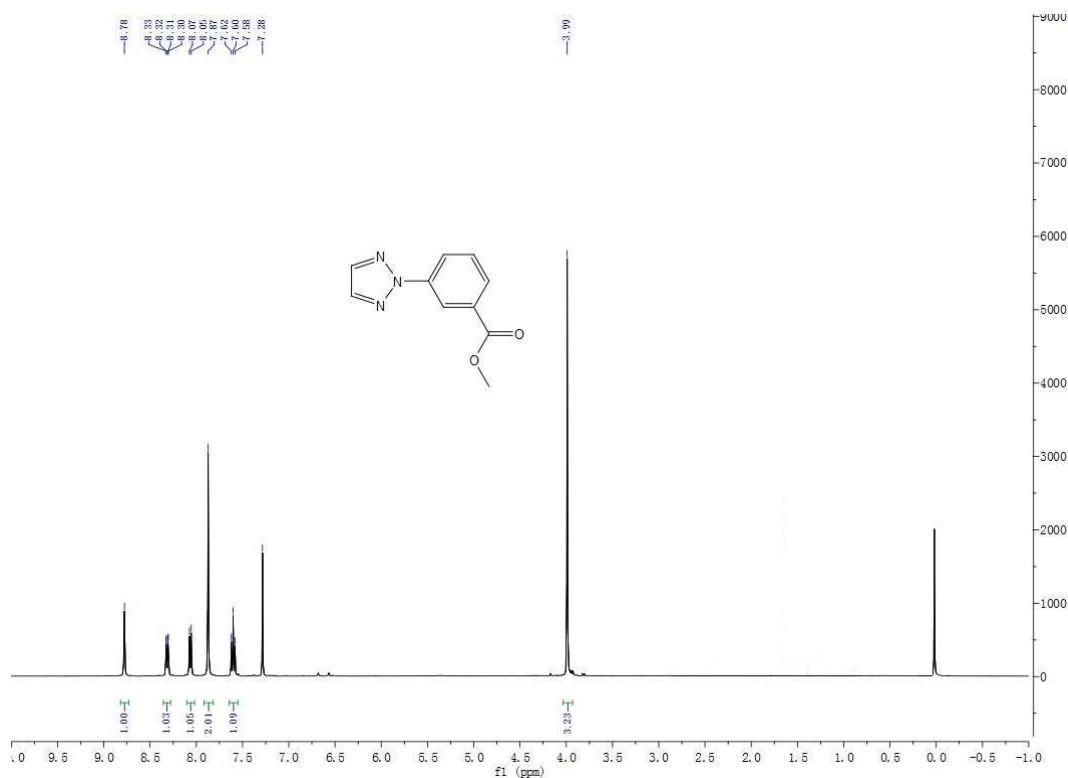

$1e^{-13}\text{C}$

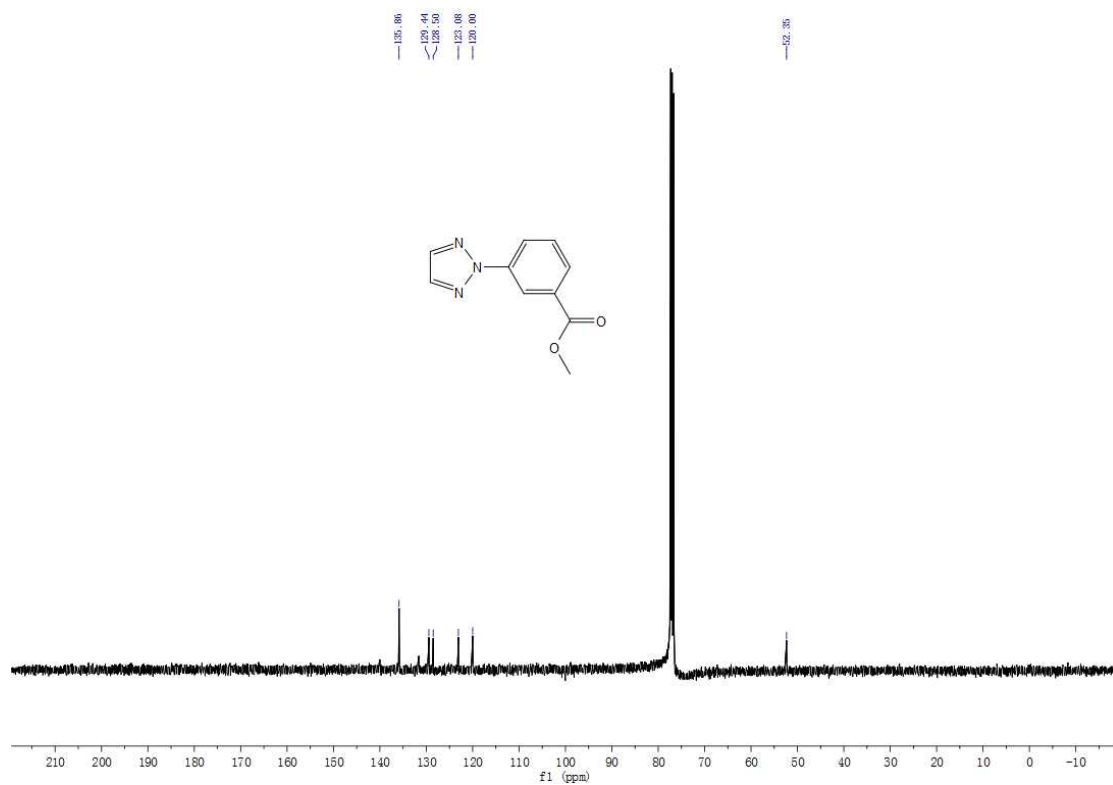

$^1\text{H}$

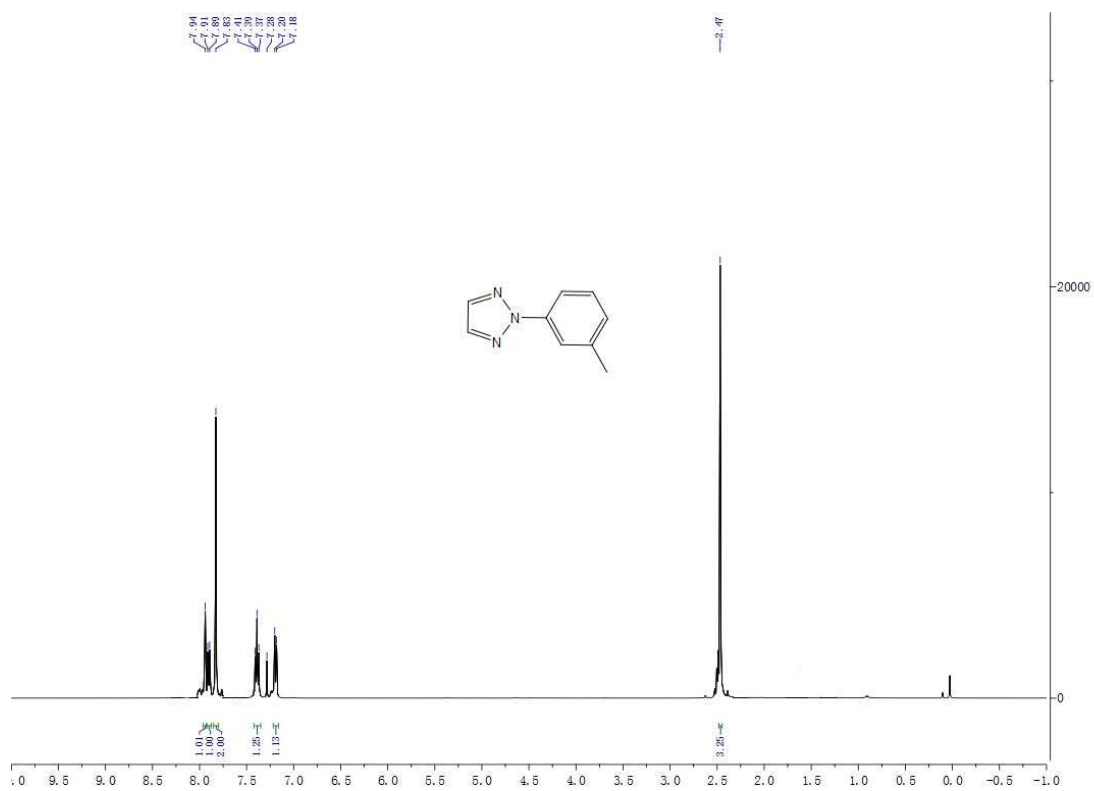

$^{13}\text{C}$

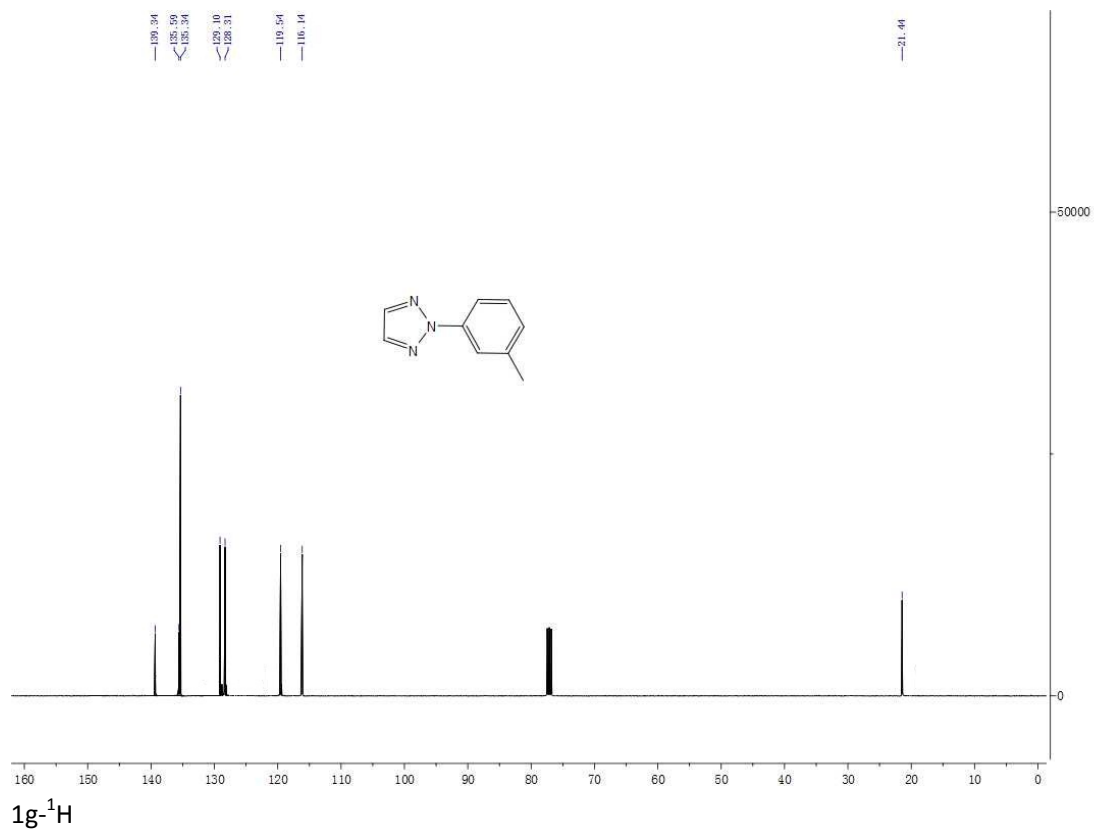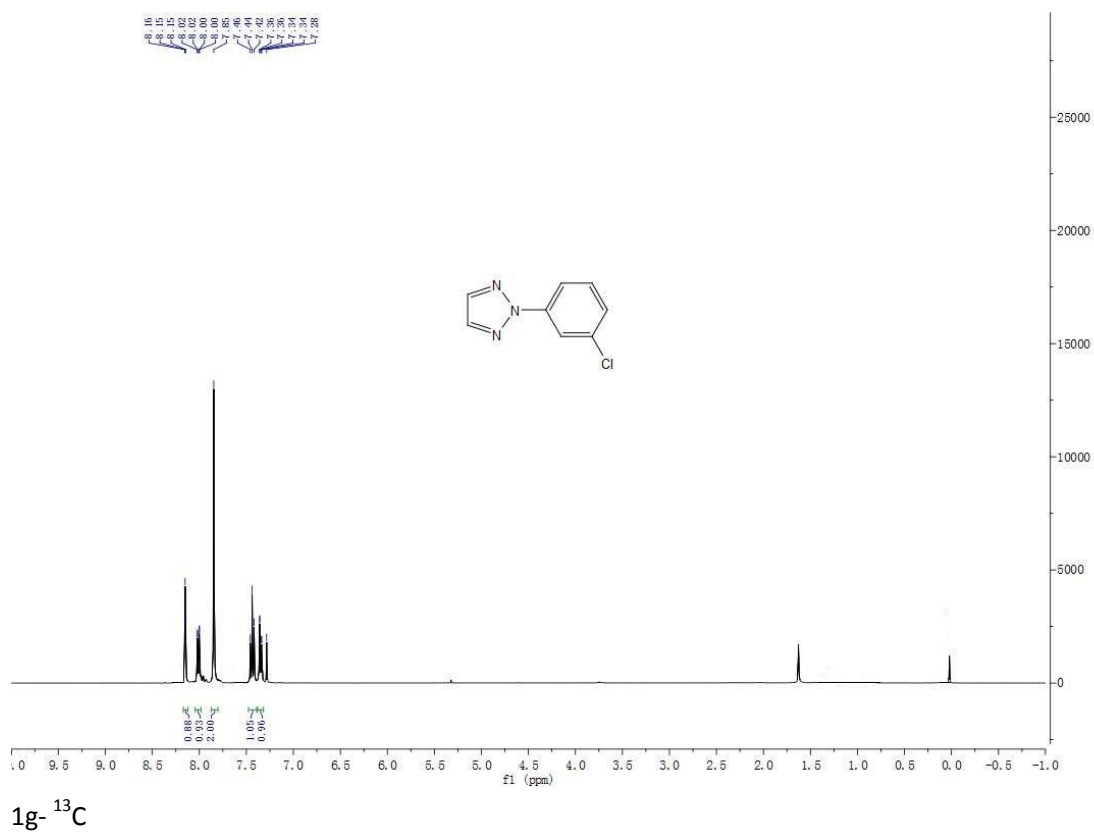

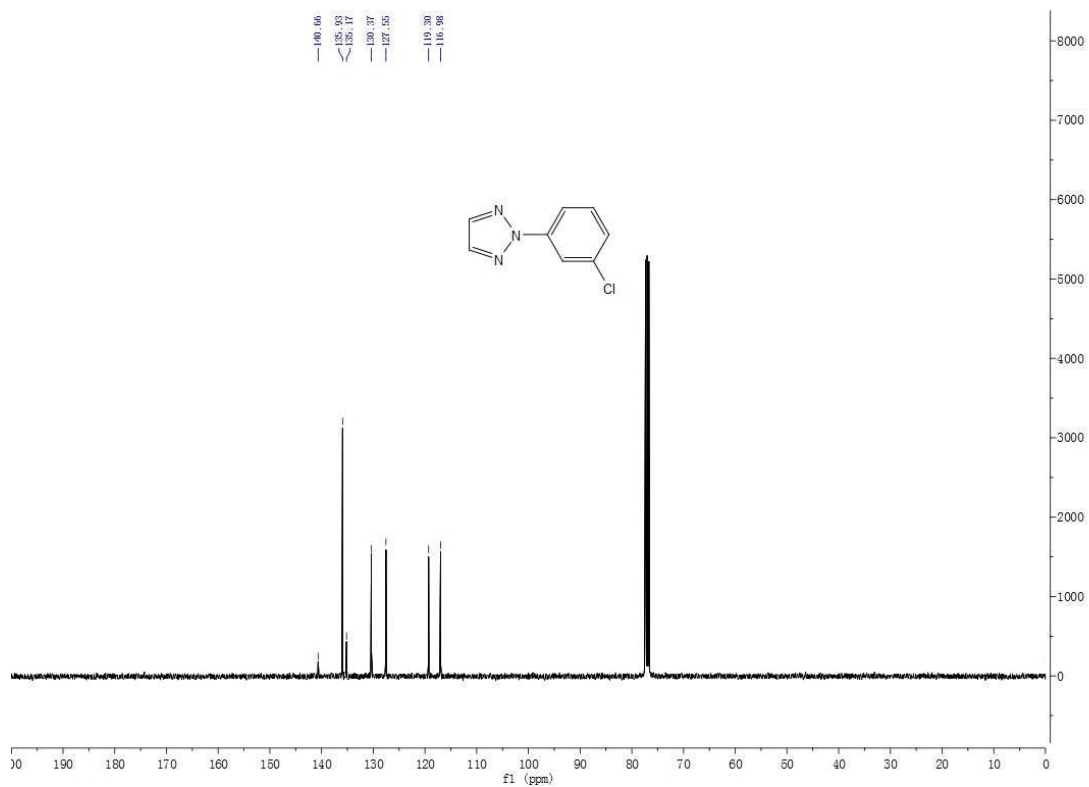

**$^1\text{H}$  NMR**

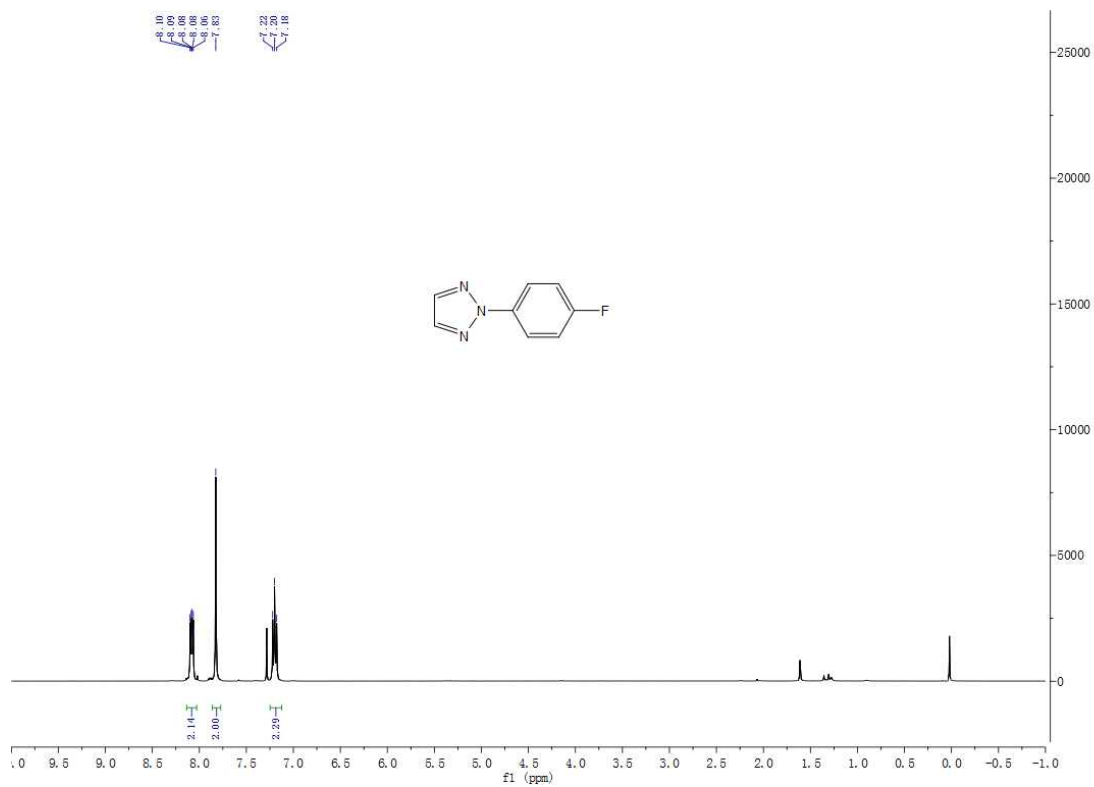

**$^{13}\text{C}$  NMR**



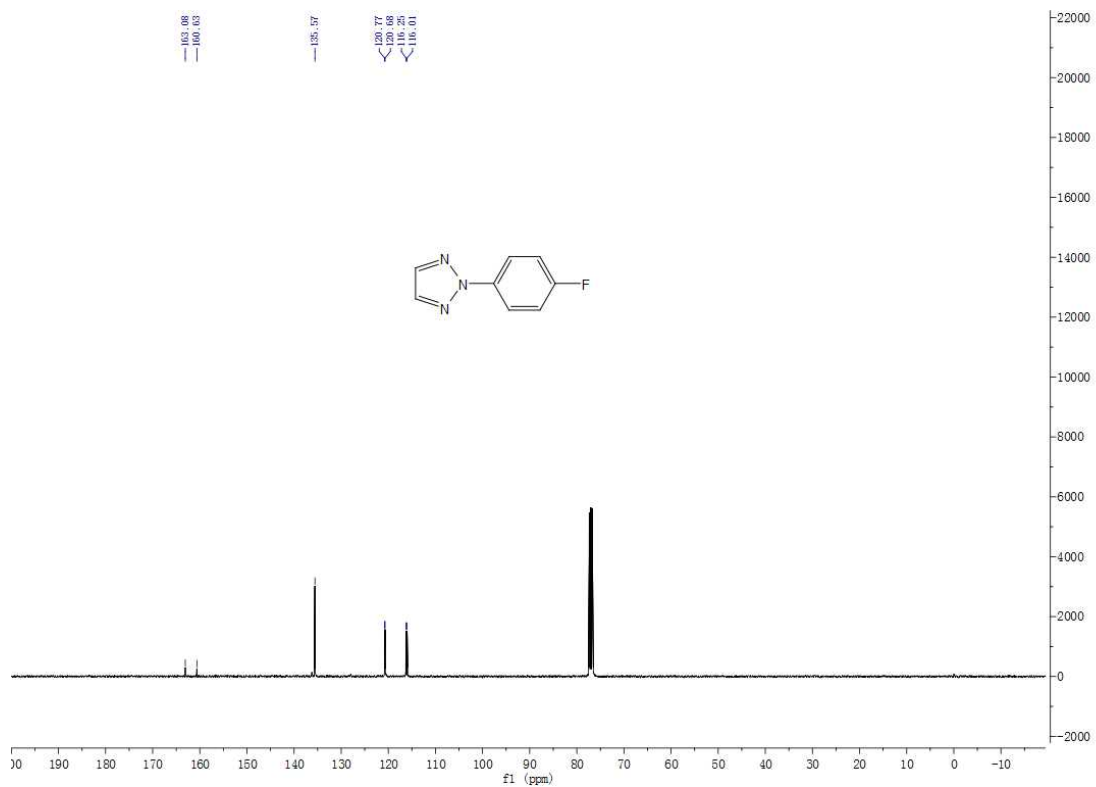

1i- $^1\text{H}$

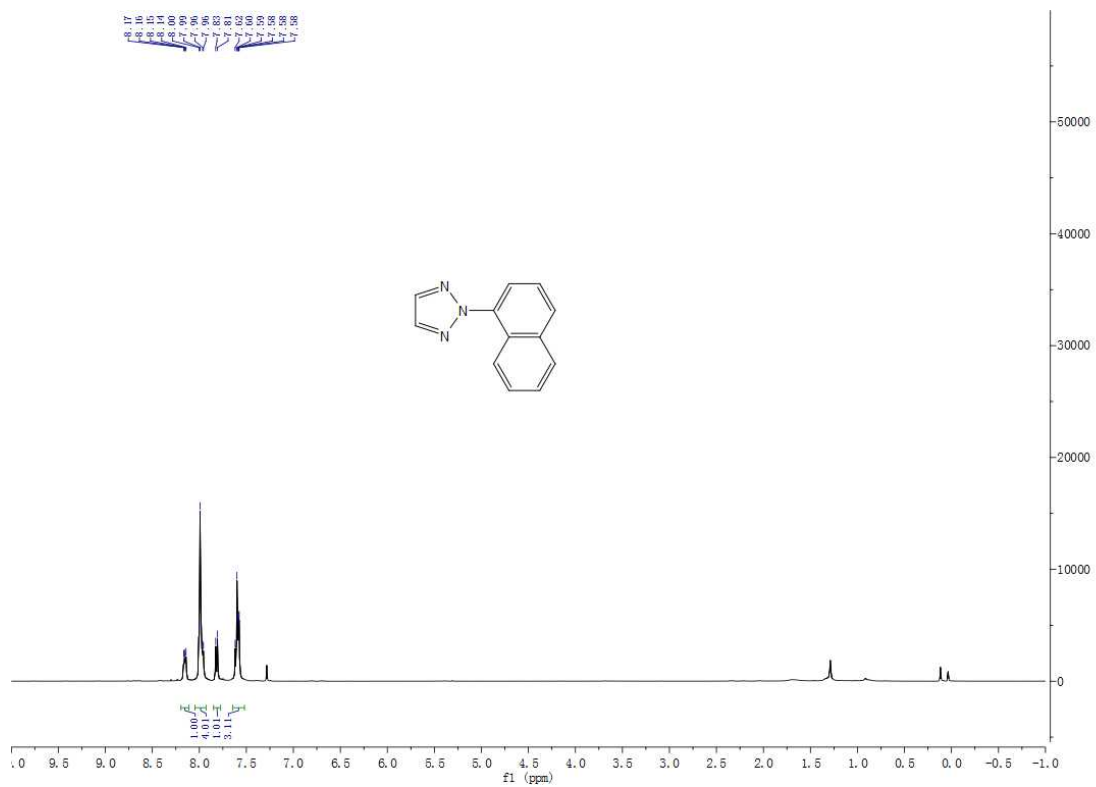

1i- $^{13}\text{C}$

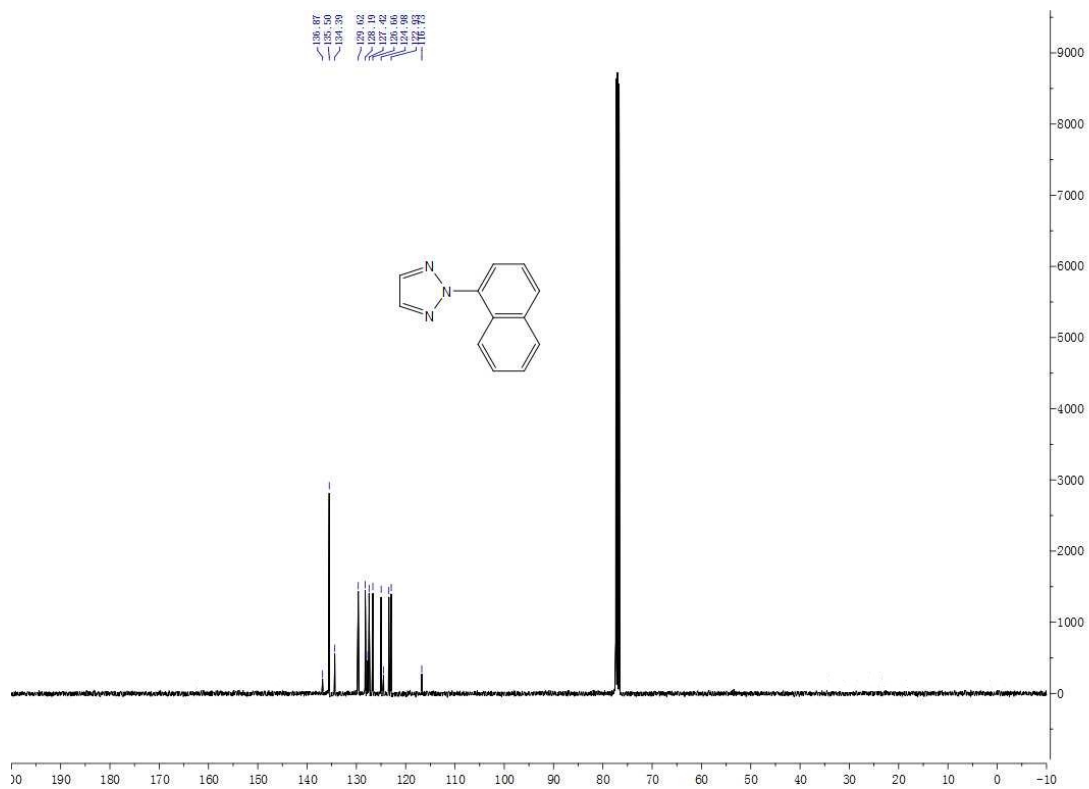



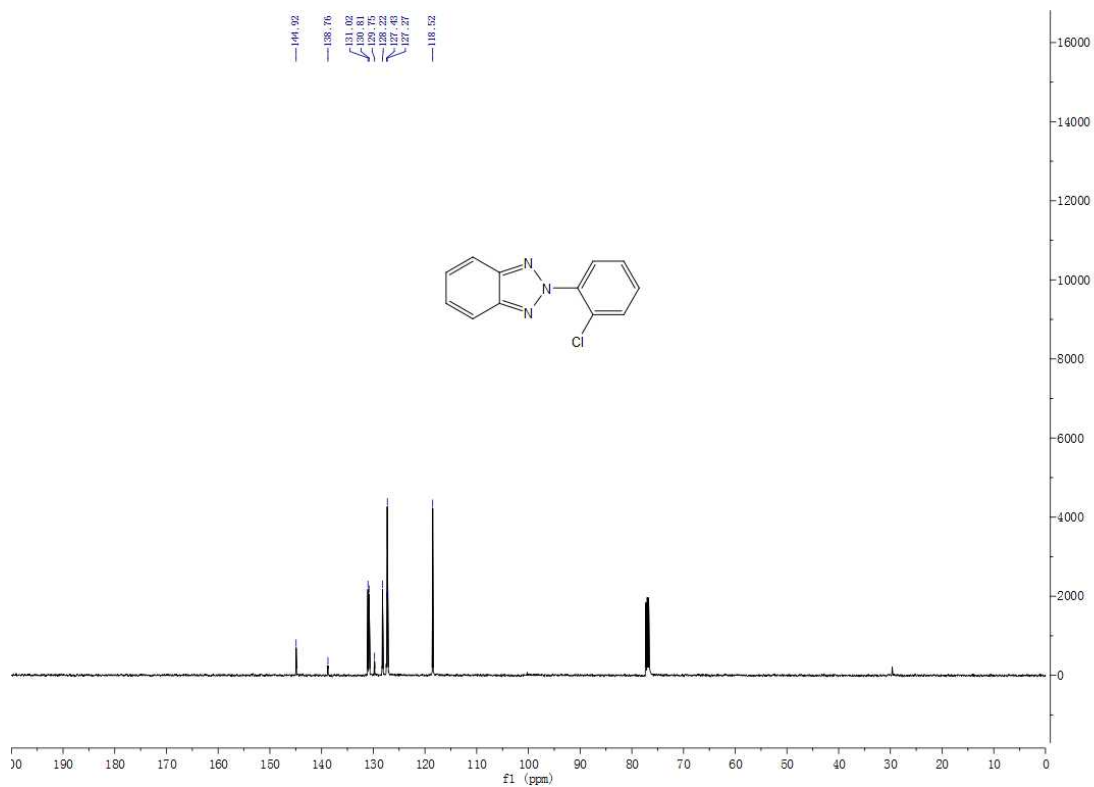

### Compounds spectra(2, 3, 4, 6, 8)

2a-<sup>1</sup>H

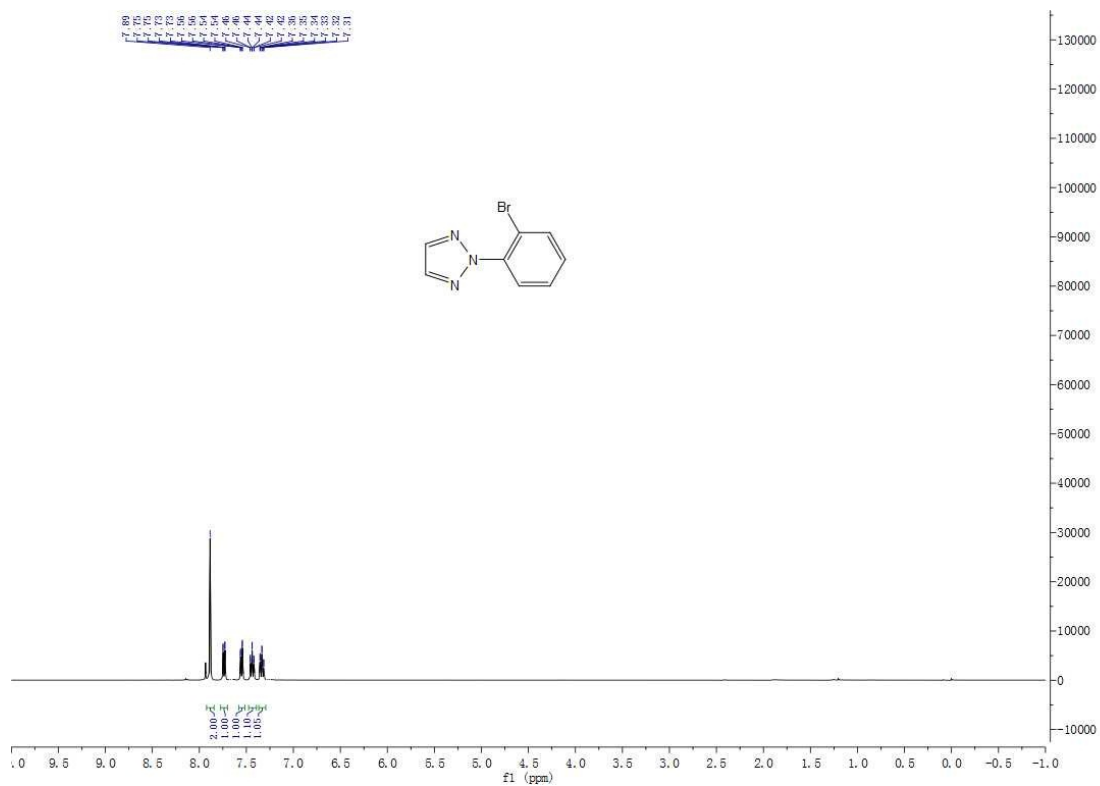

2a-<sup>13</sup>C

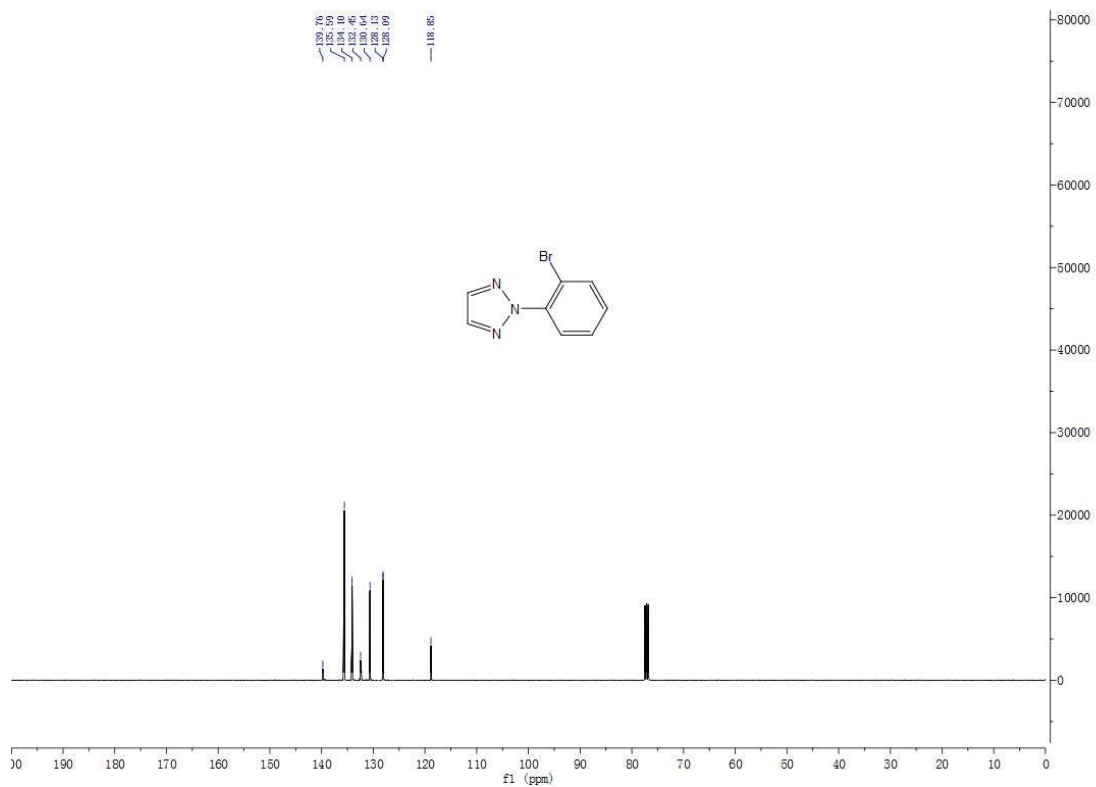

2b-<sup>1</sup>H

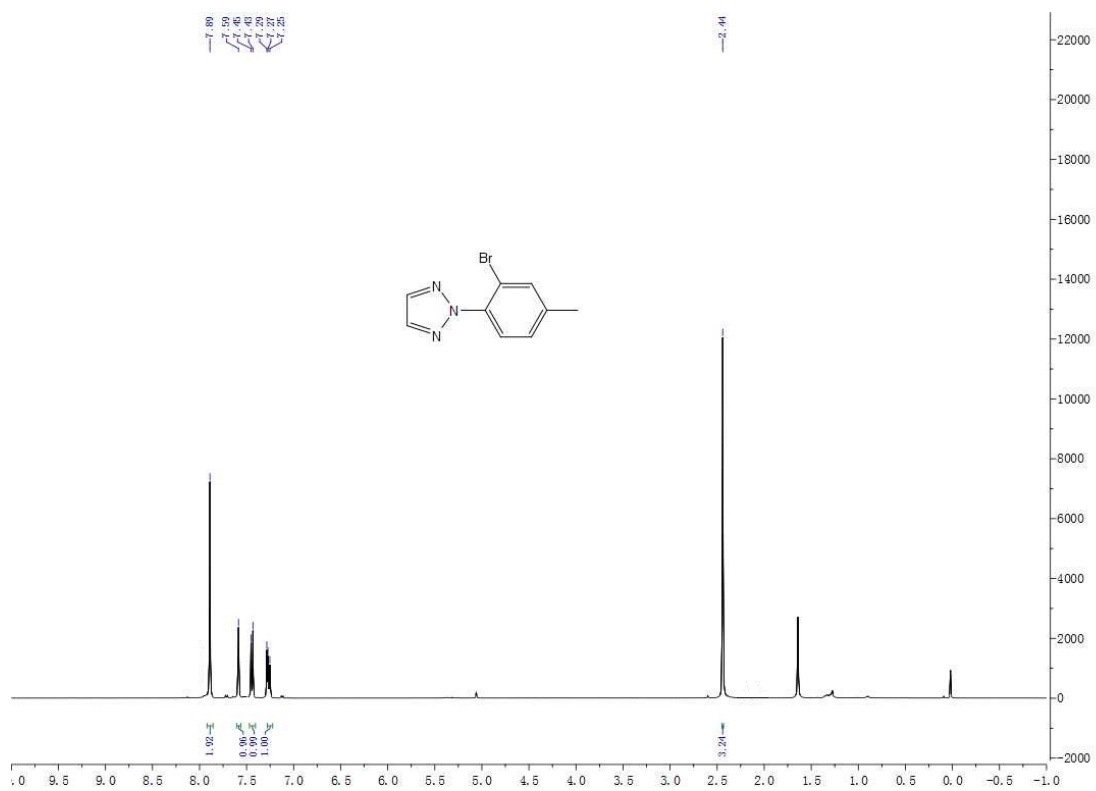

2b-<sup>13</sup>C

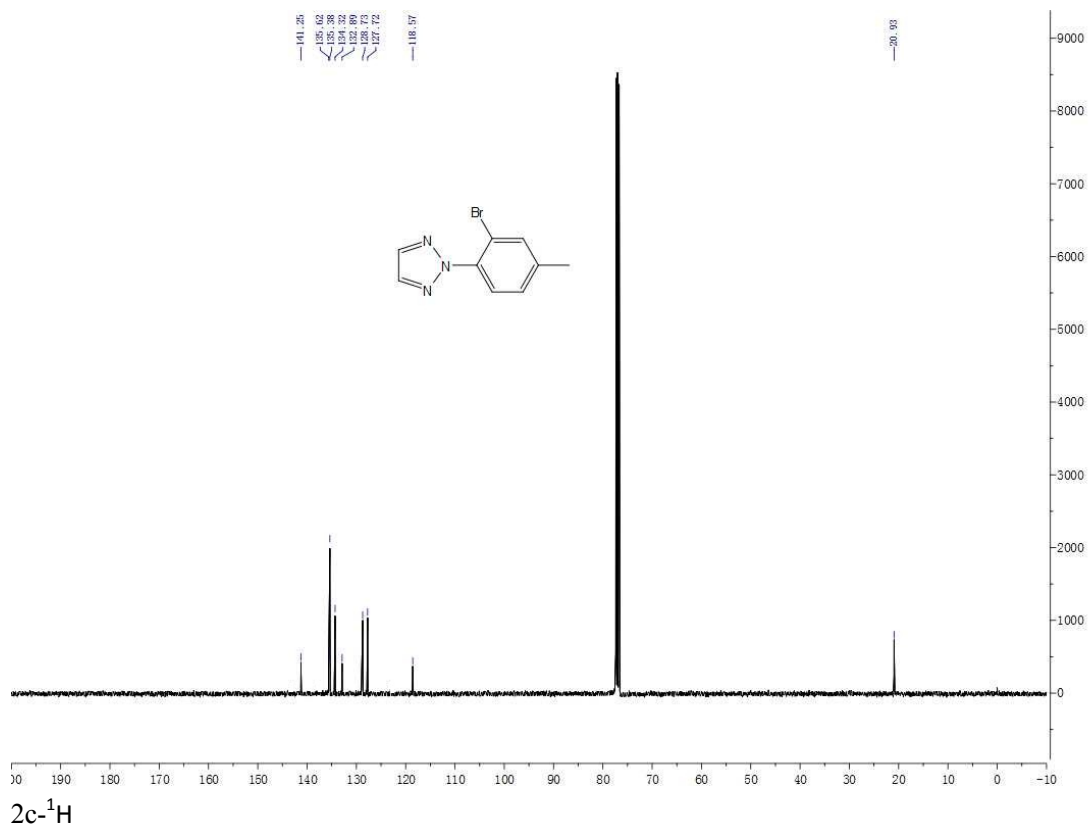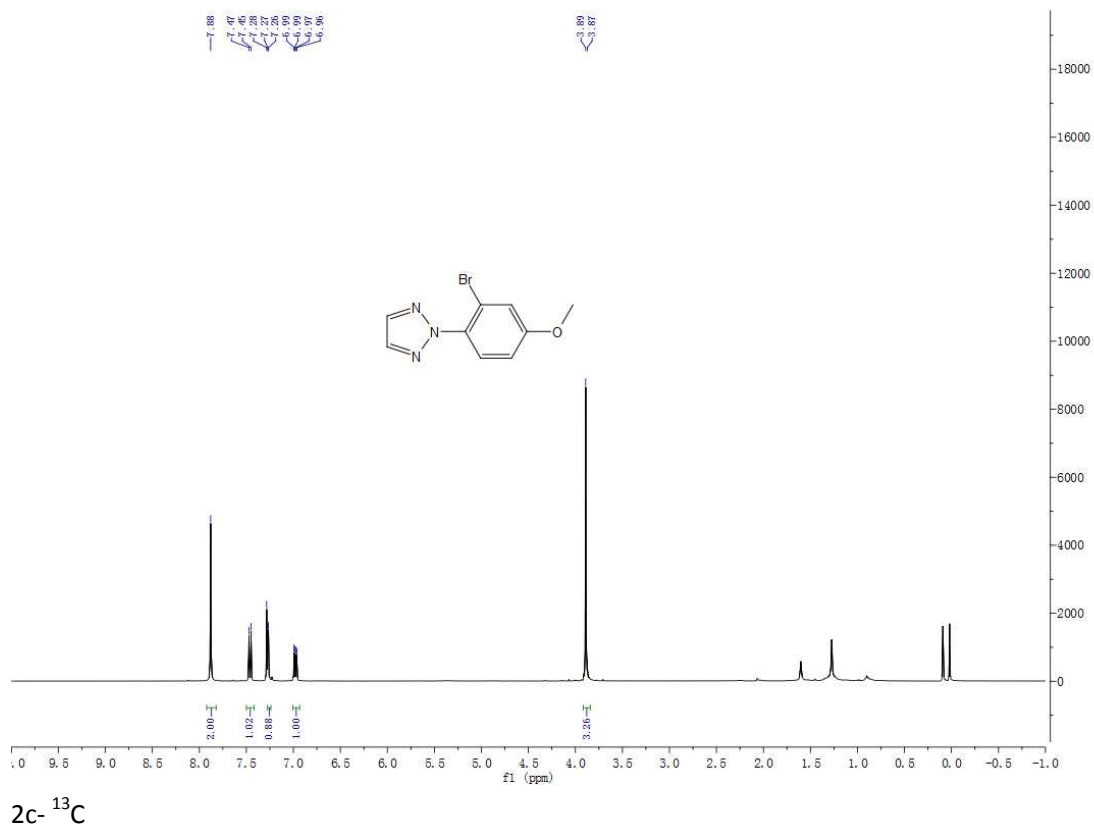

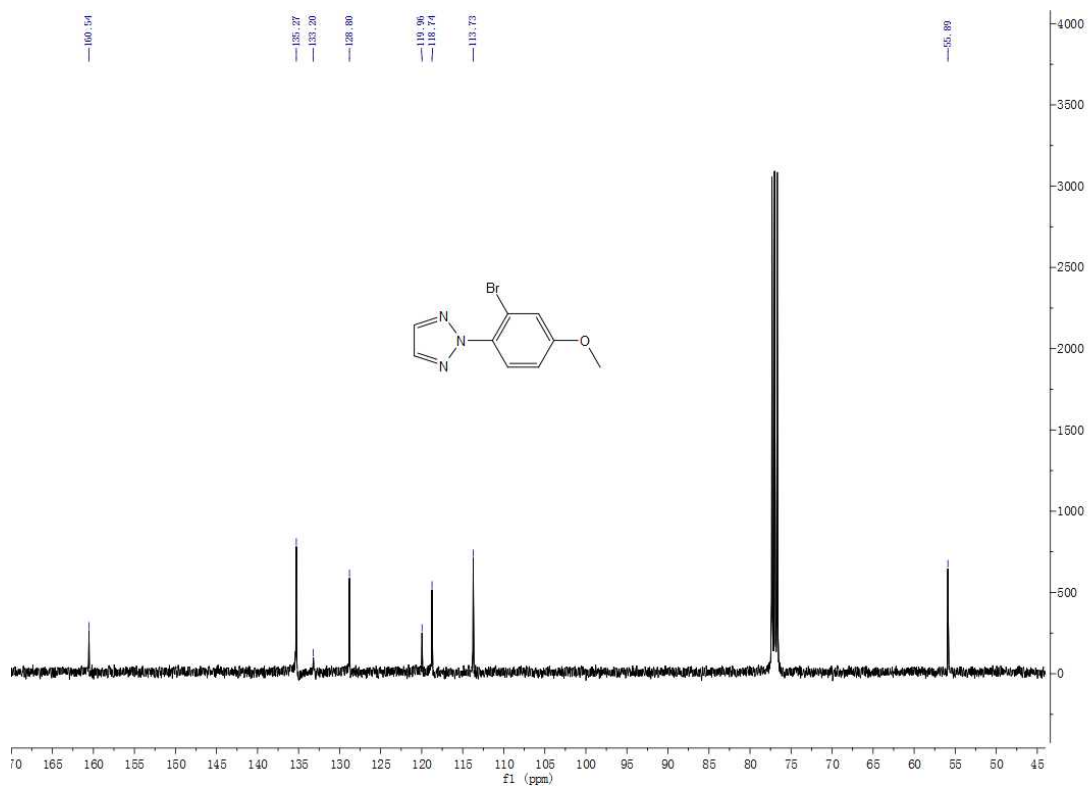

**$^1\text{H}$  NMR**

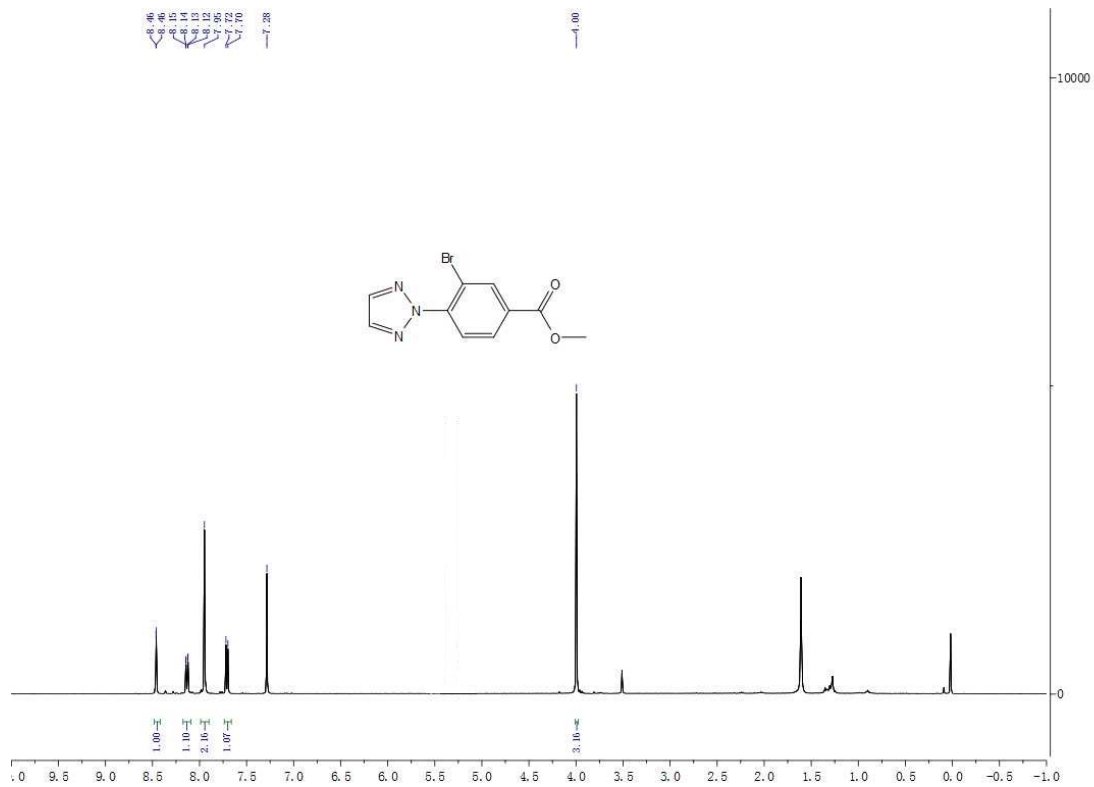

**$^{13}\text{C}$  NMR**

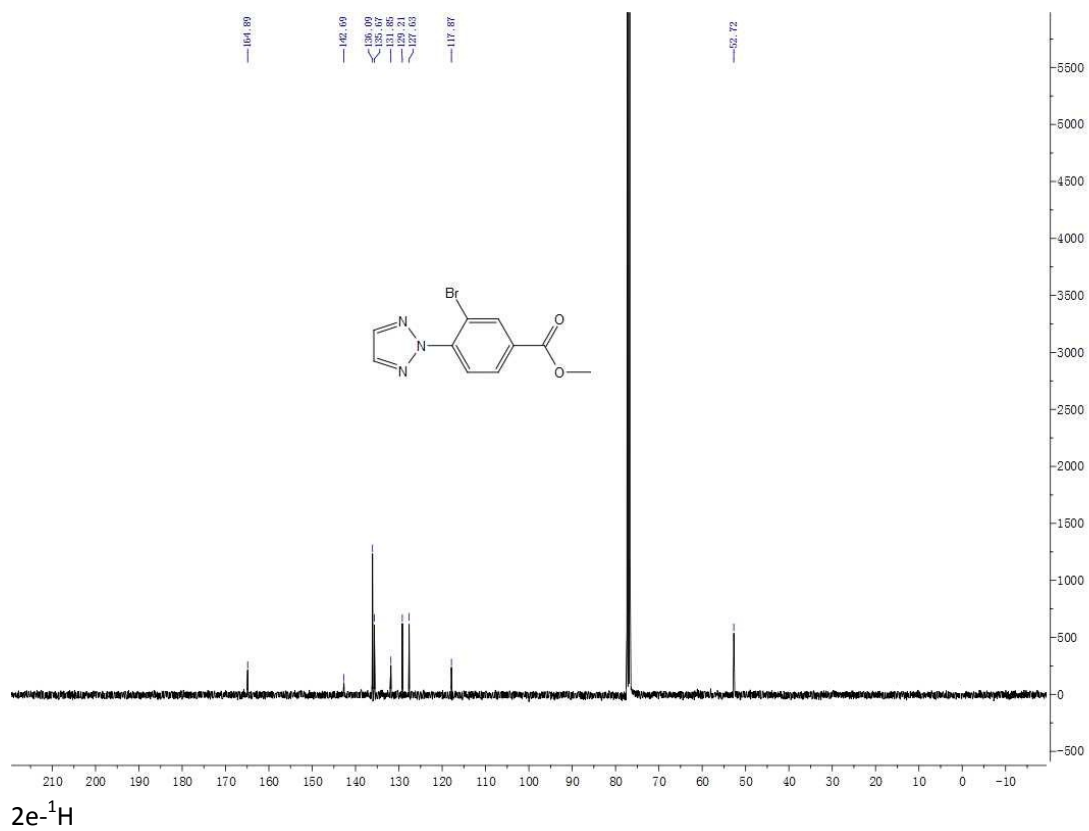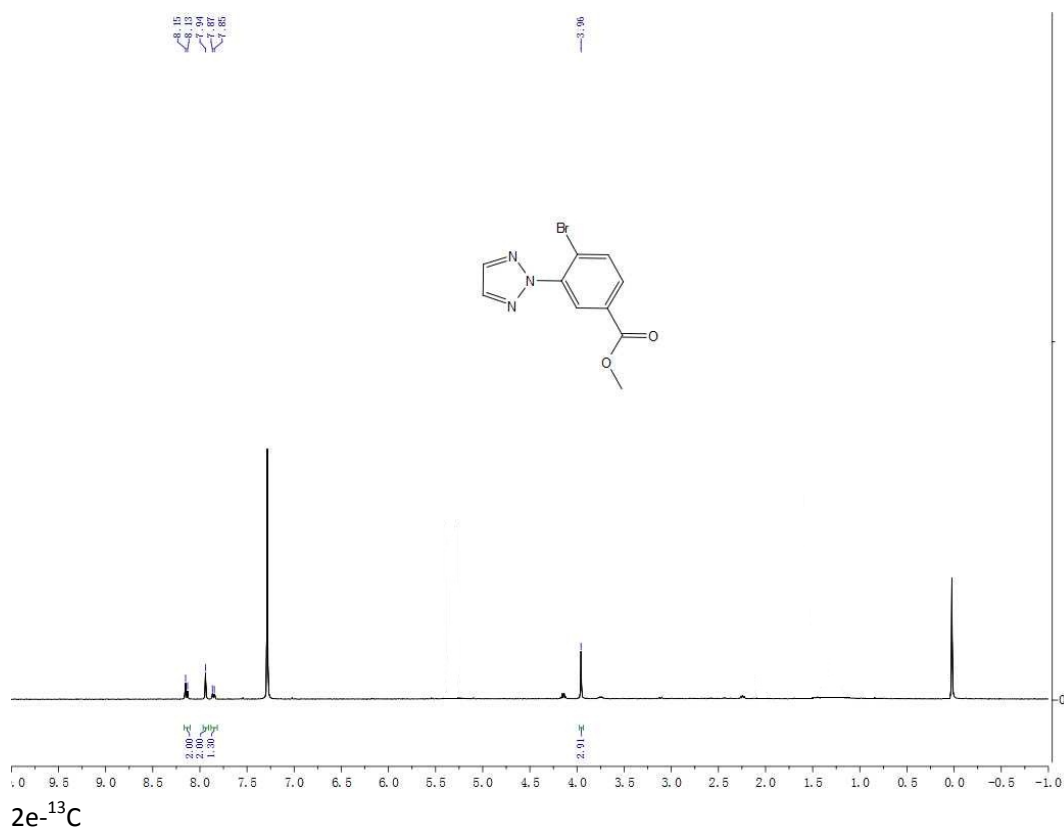



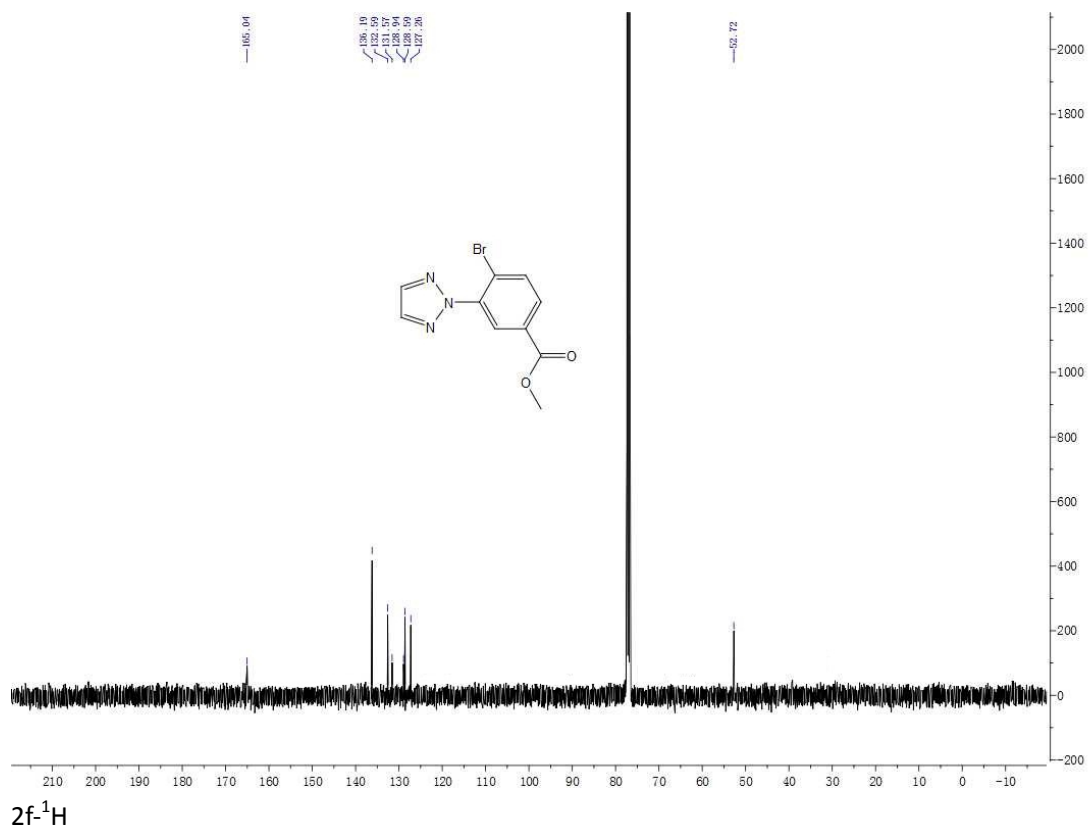

$2f\text{-}^1\text{H}$

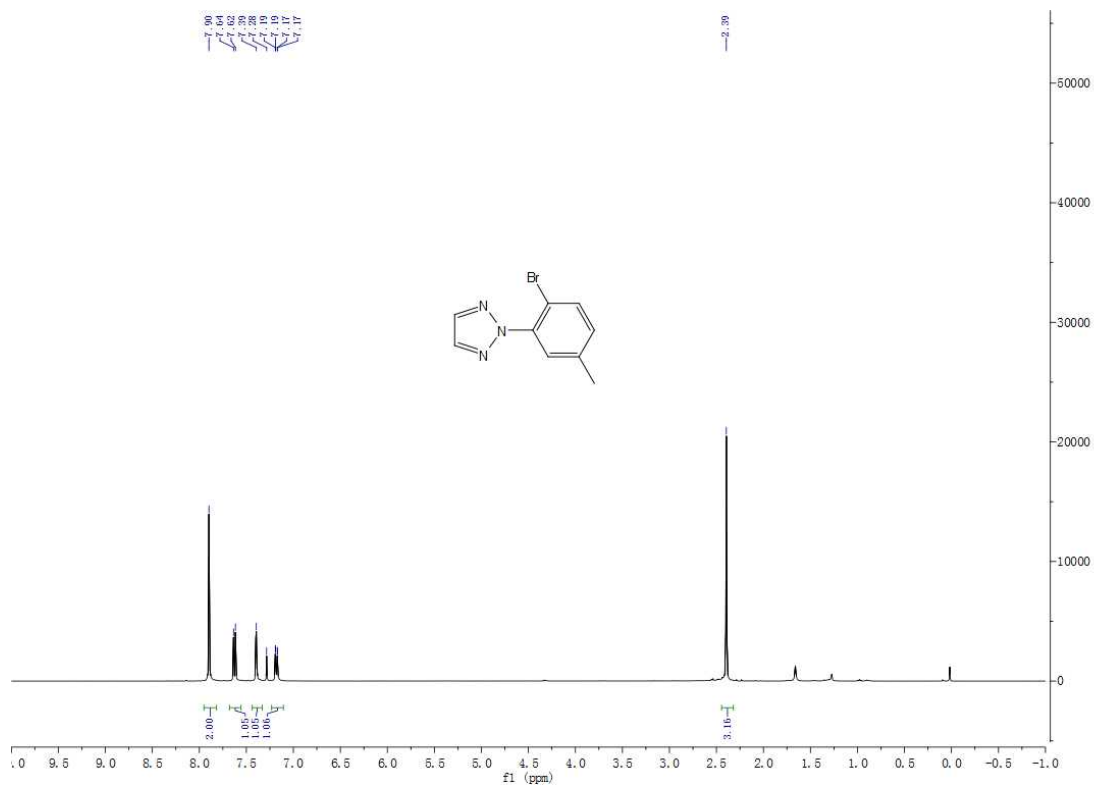

$2f\text{-}^{13}\text{C}$

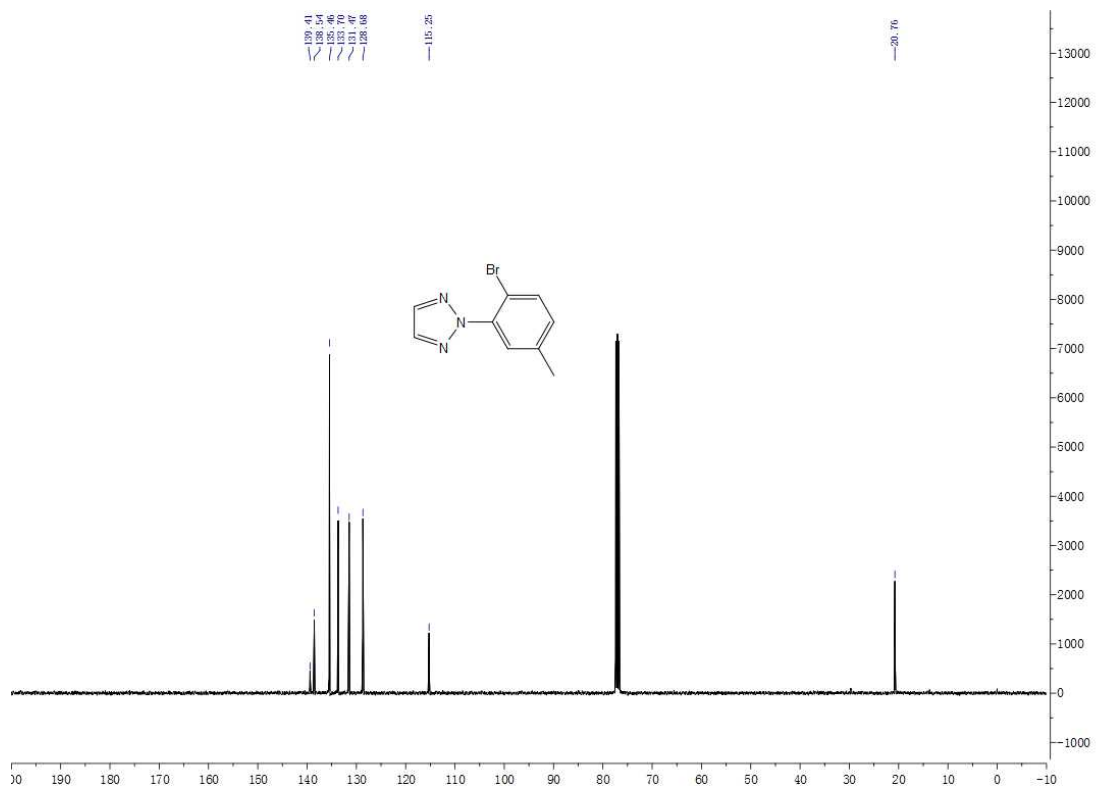

2g- $^1\text{H}$

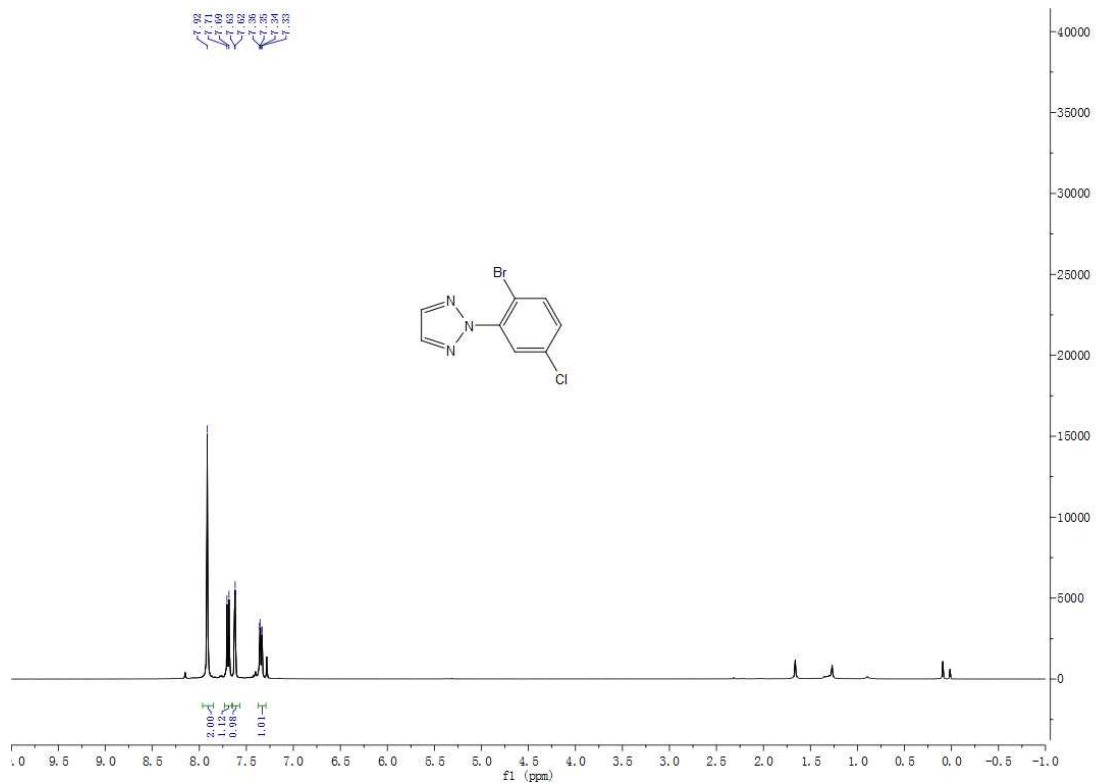

2g- $^{13}\text{C}$

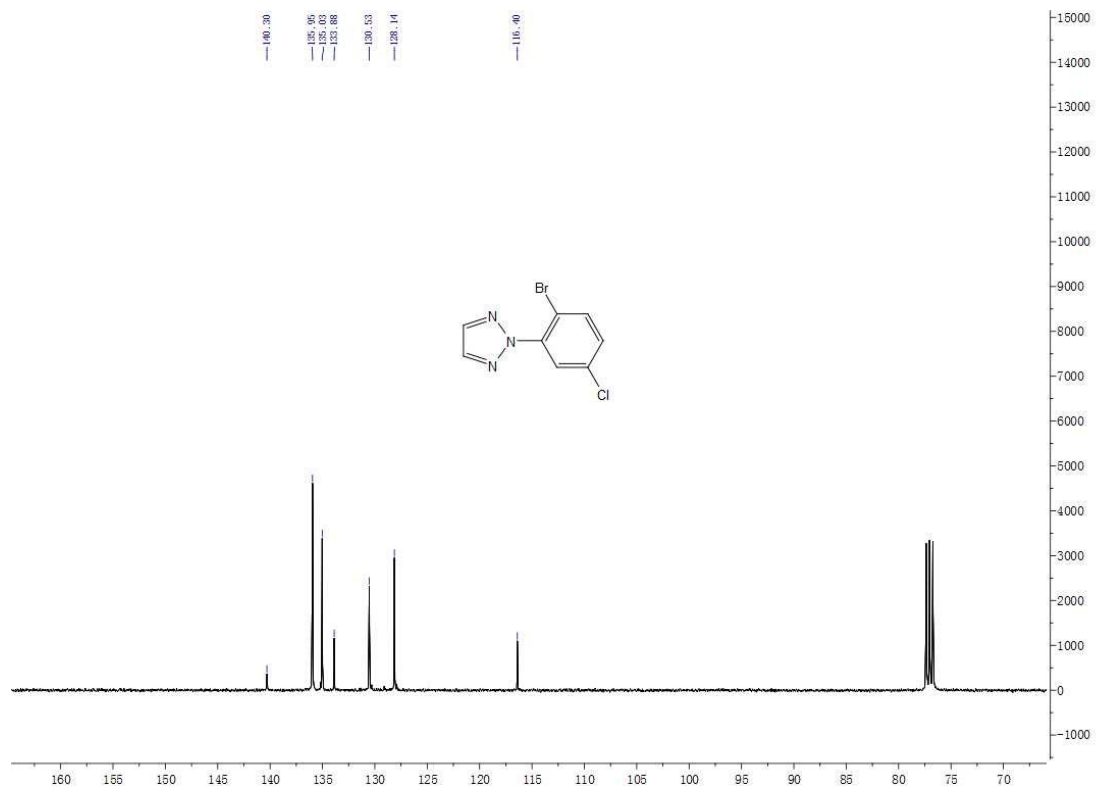

<sup>2</sup>H-<sup>1</sup>H

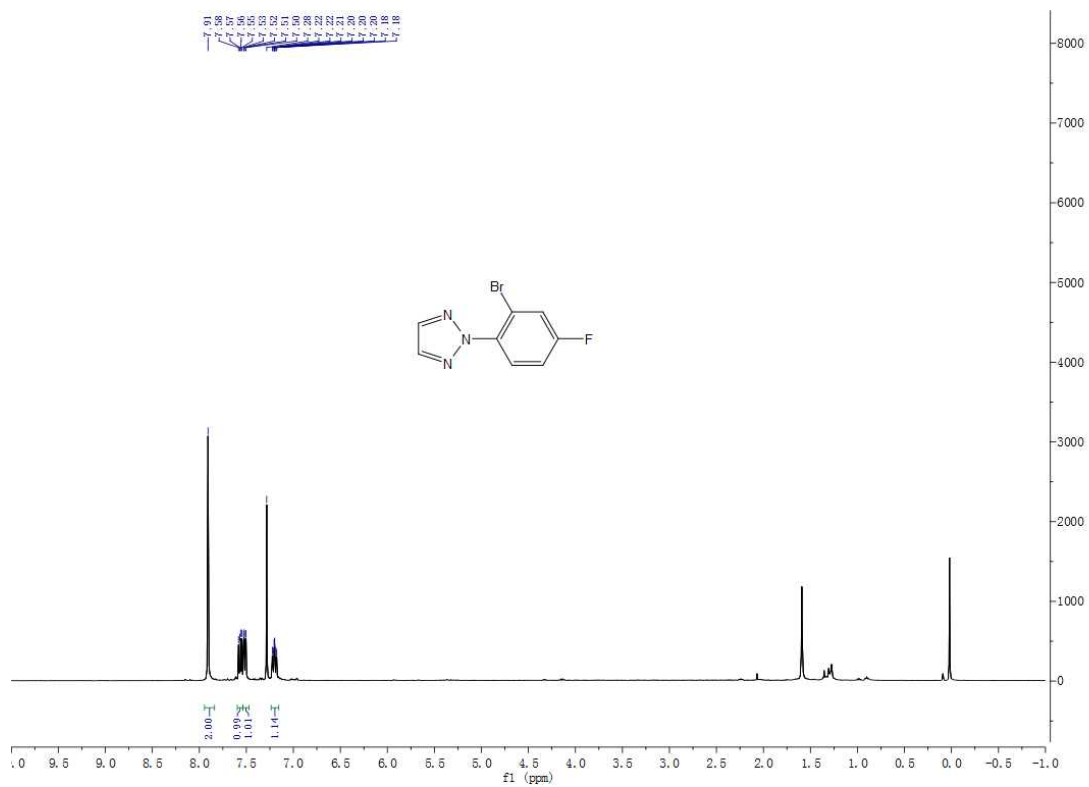

<sup>2</sup>H-<sup>13</sup>C

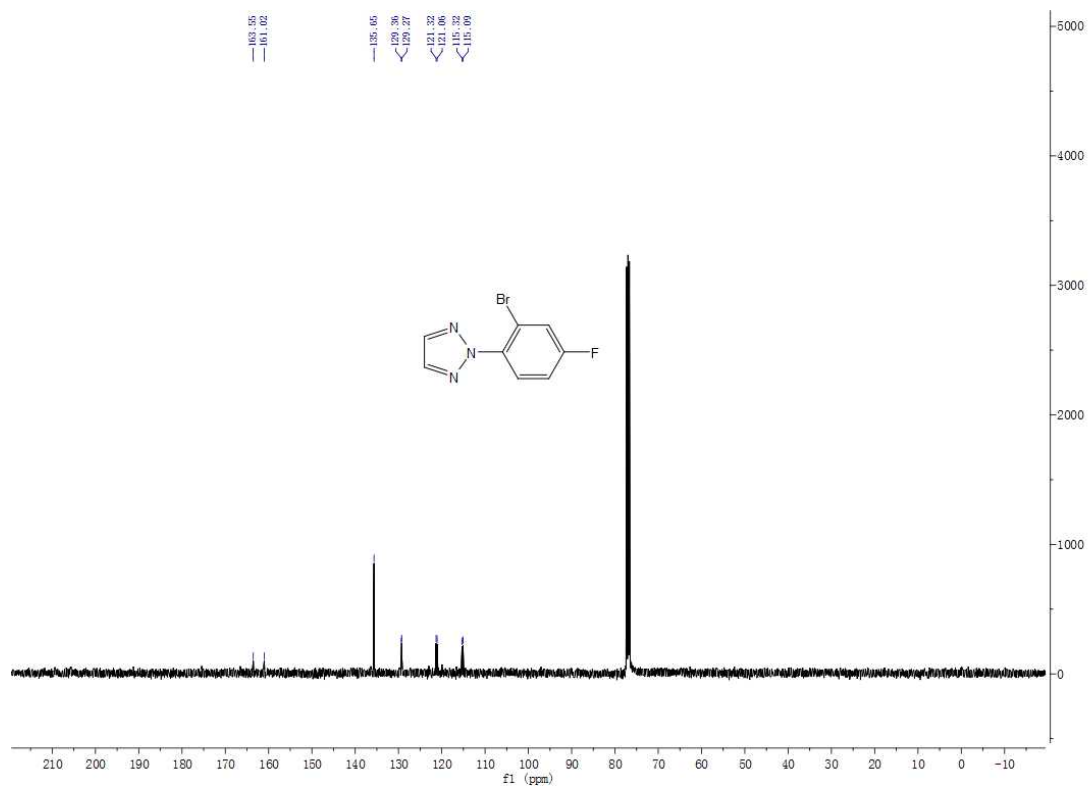

$2i\text{-}^1\text{H}$

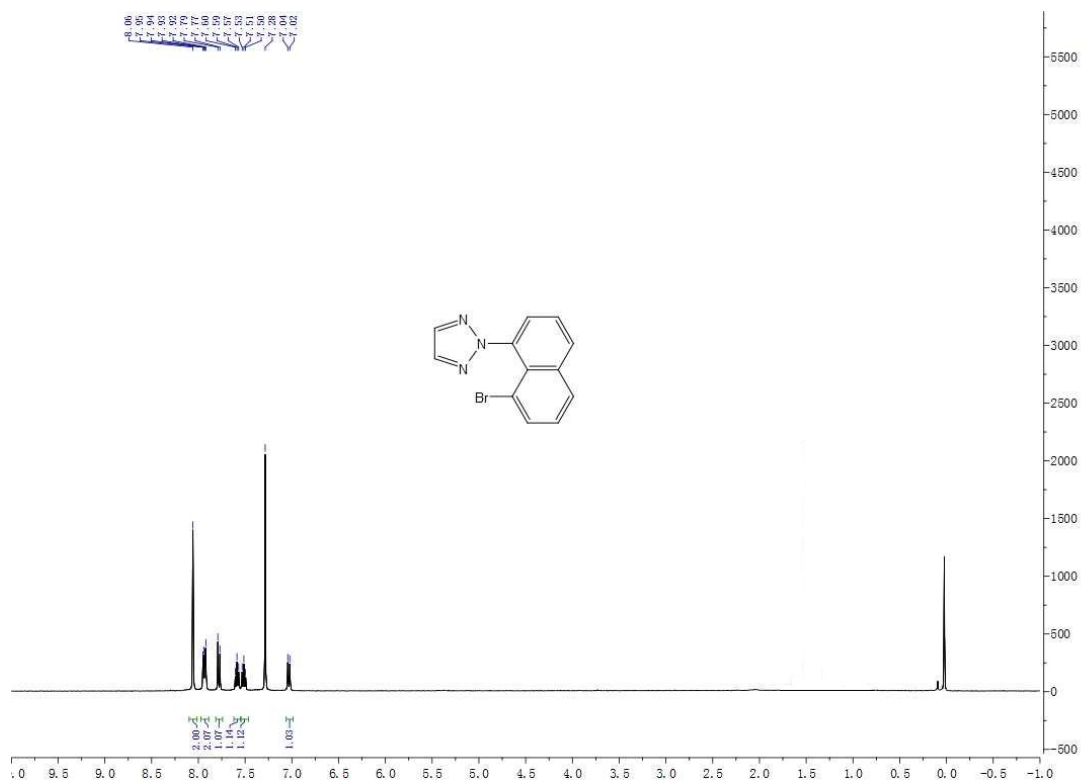

$2i\text{-}^{13}\text{C}$

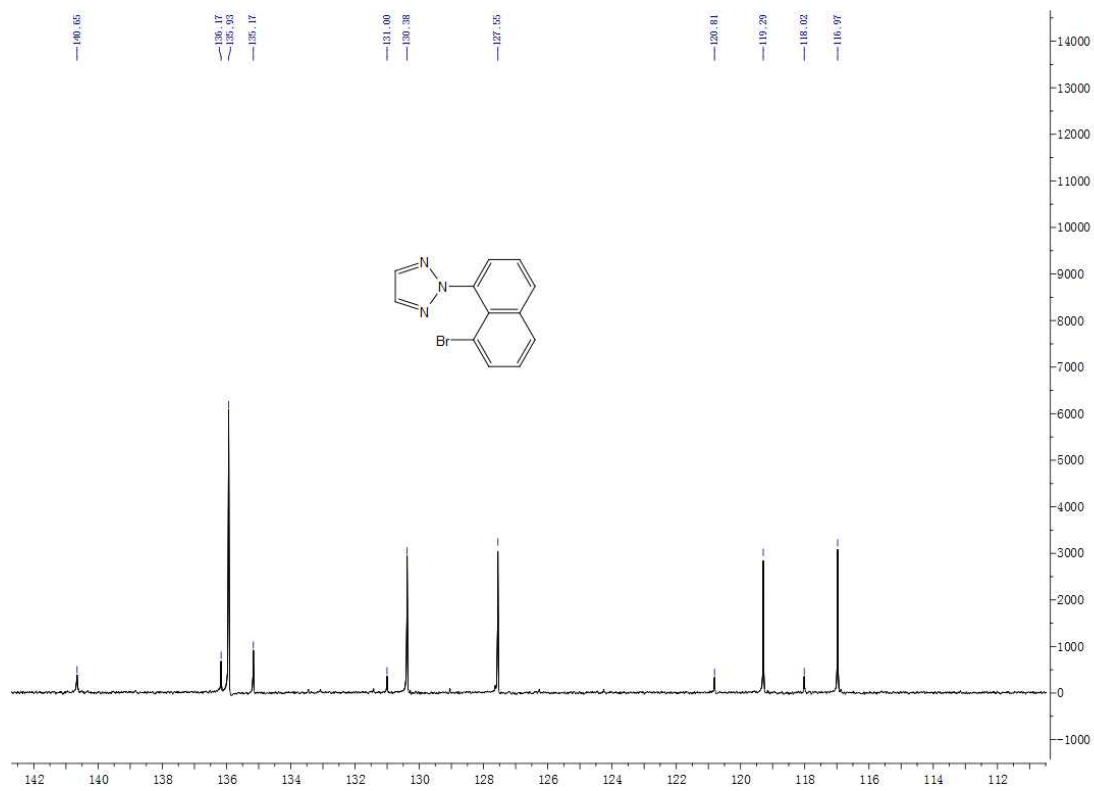

2j- $^1\text{H}$

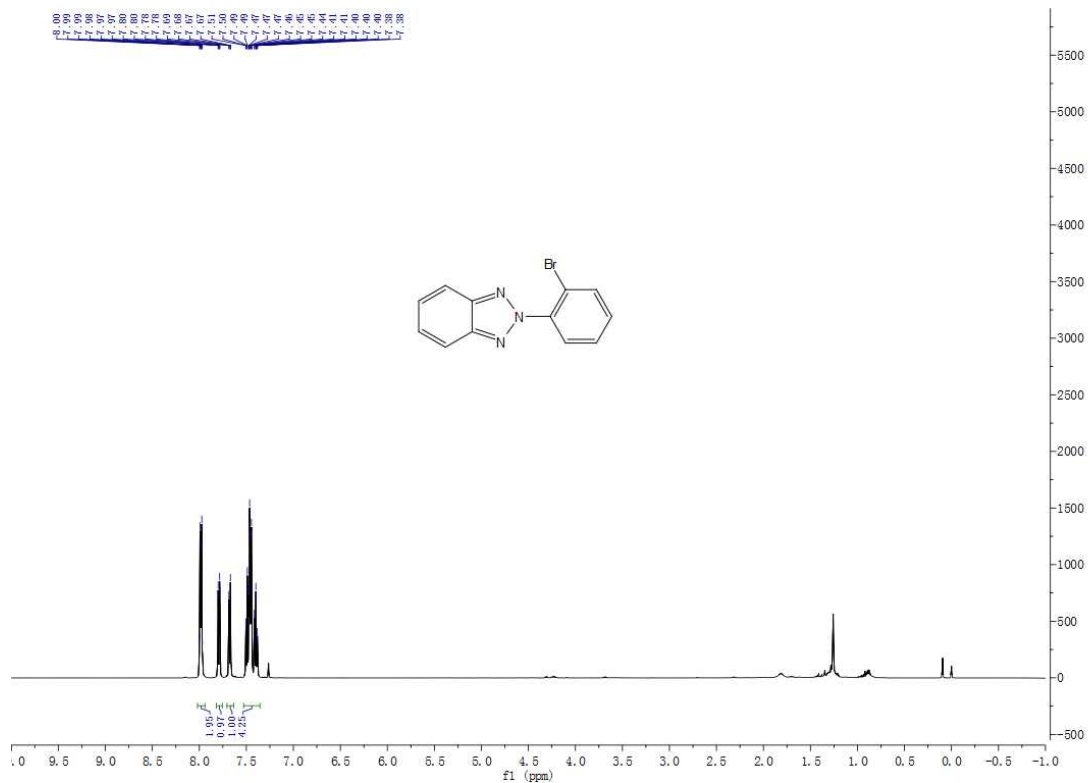

2j- $^{13}\text{C}$

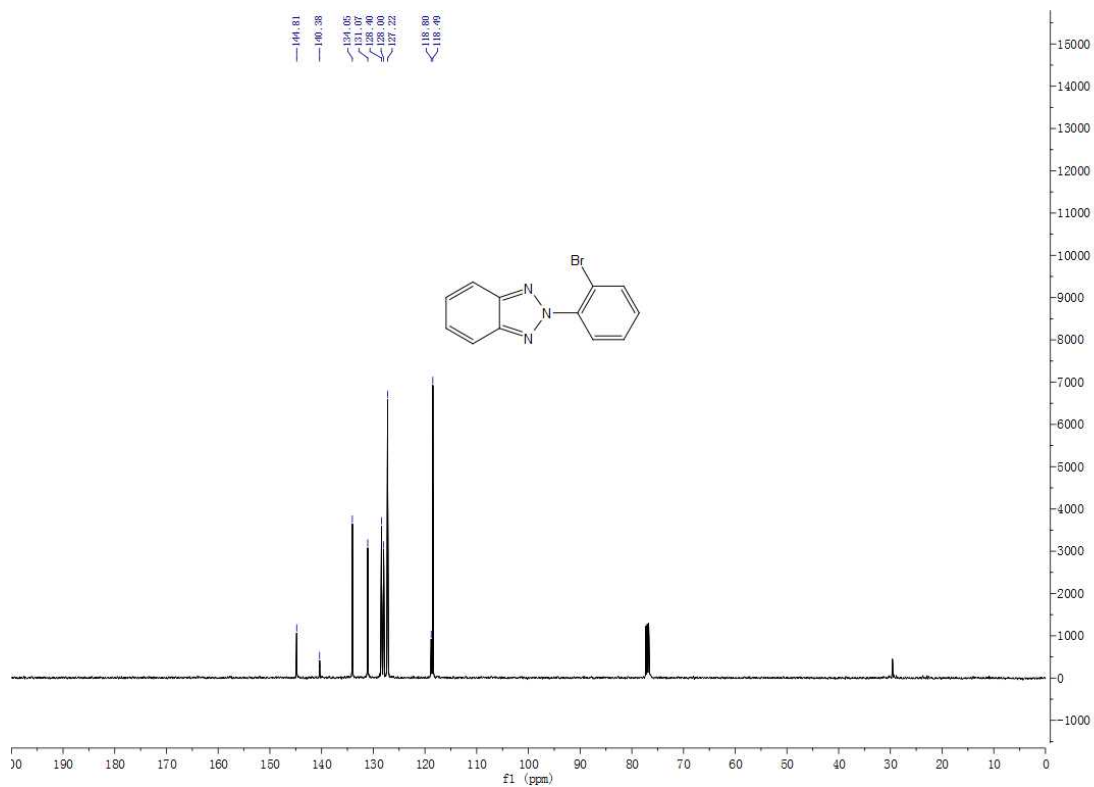

**$^1\text{H}$**

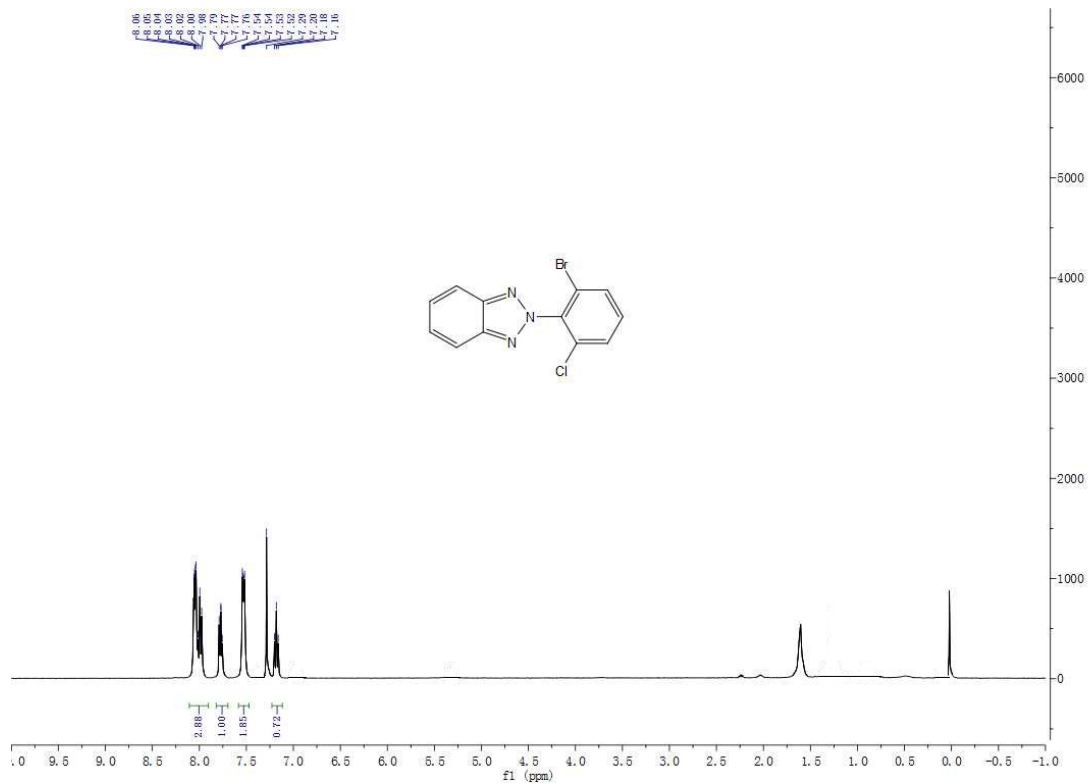

**$^{13}\text{C}$**

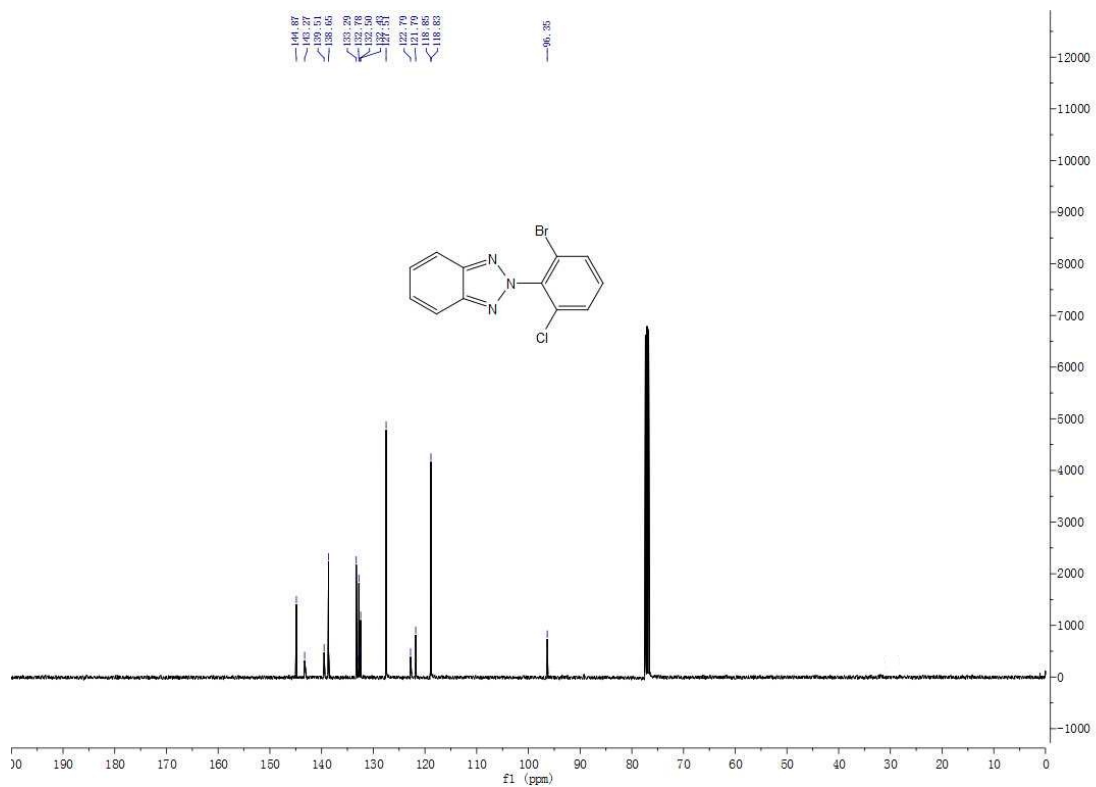

$2\text{I-}^1\text{H}$

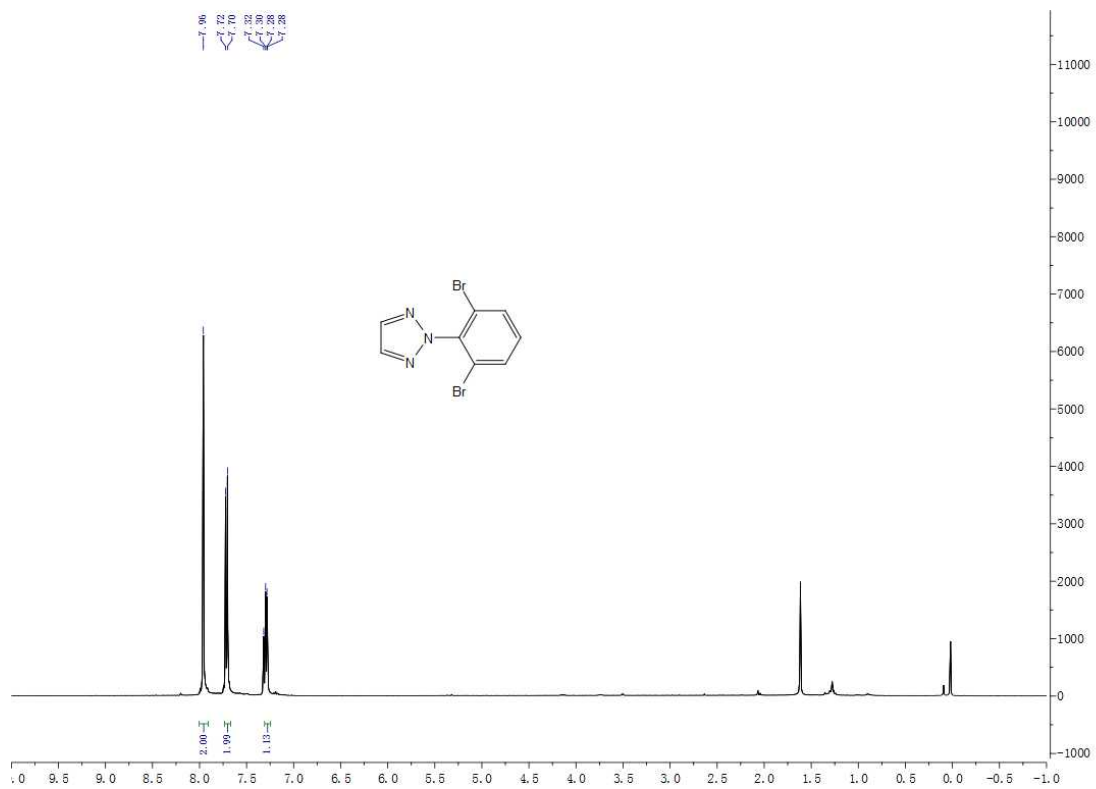

$2\text{I-}^{13}\text{C}$

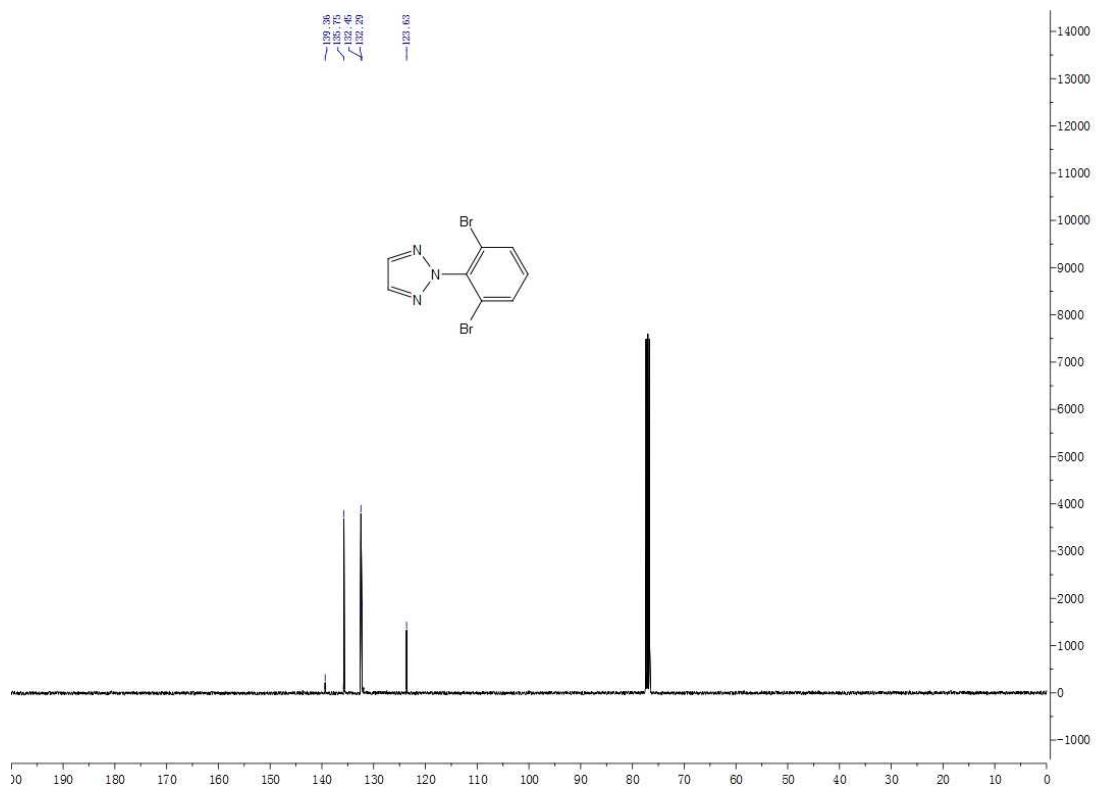

3a-<sup>1</sup>H

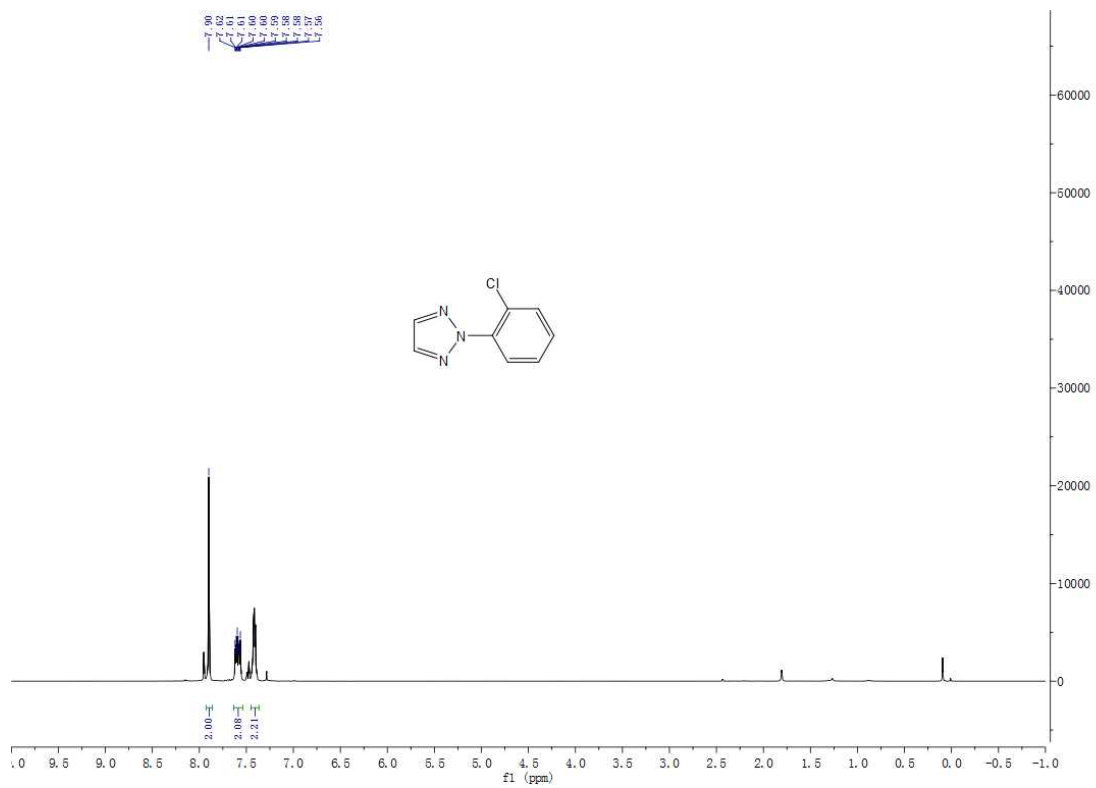

3a-<sup>13</sup>C



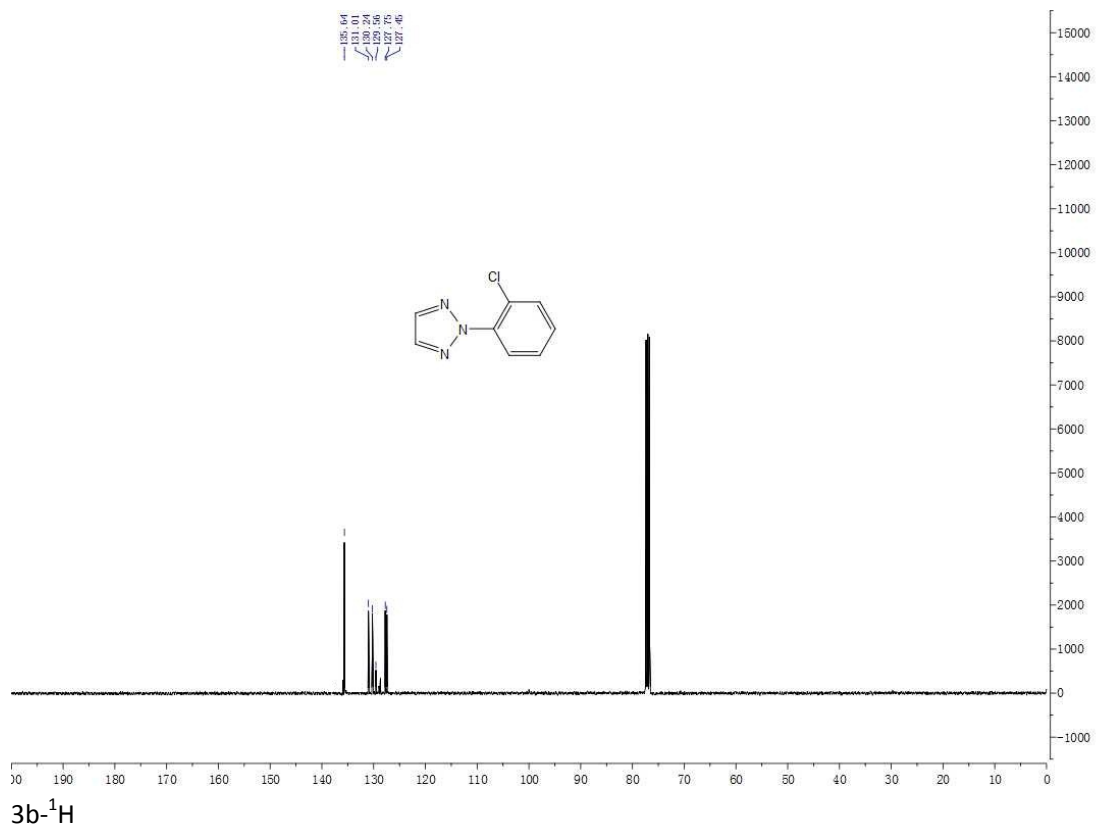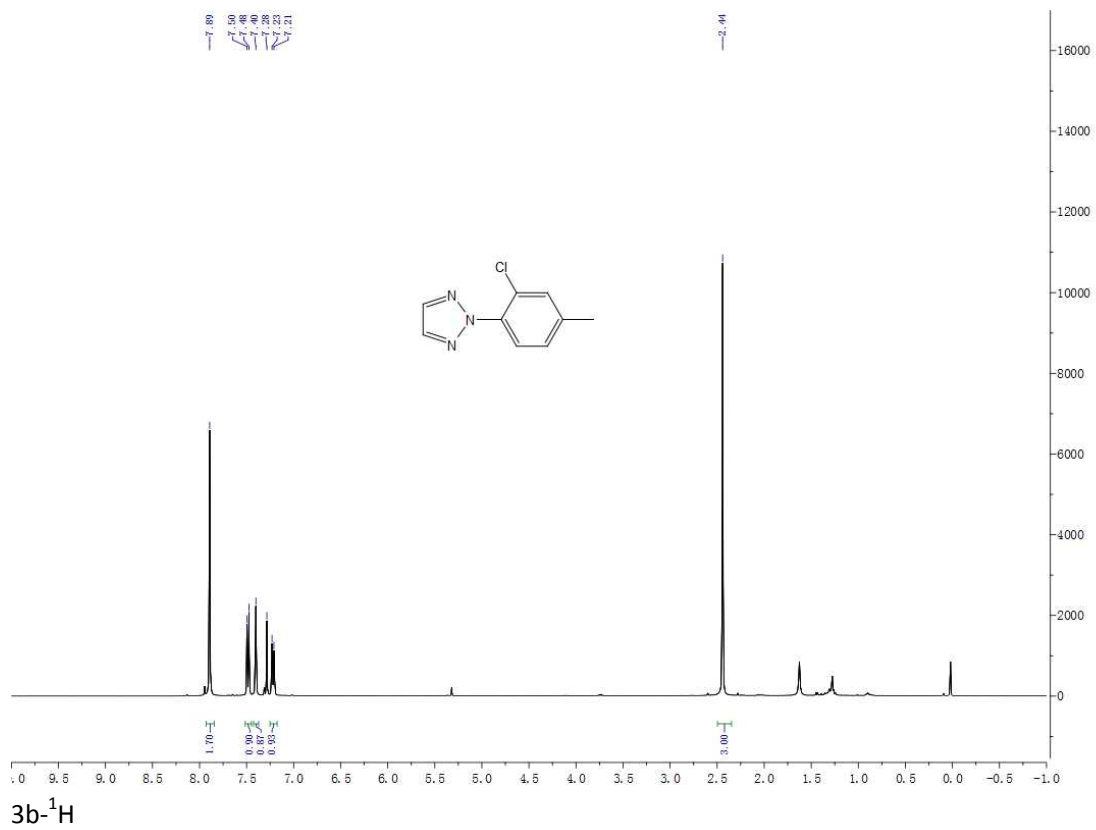

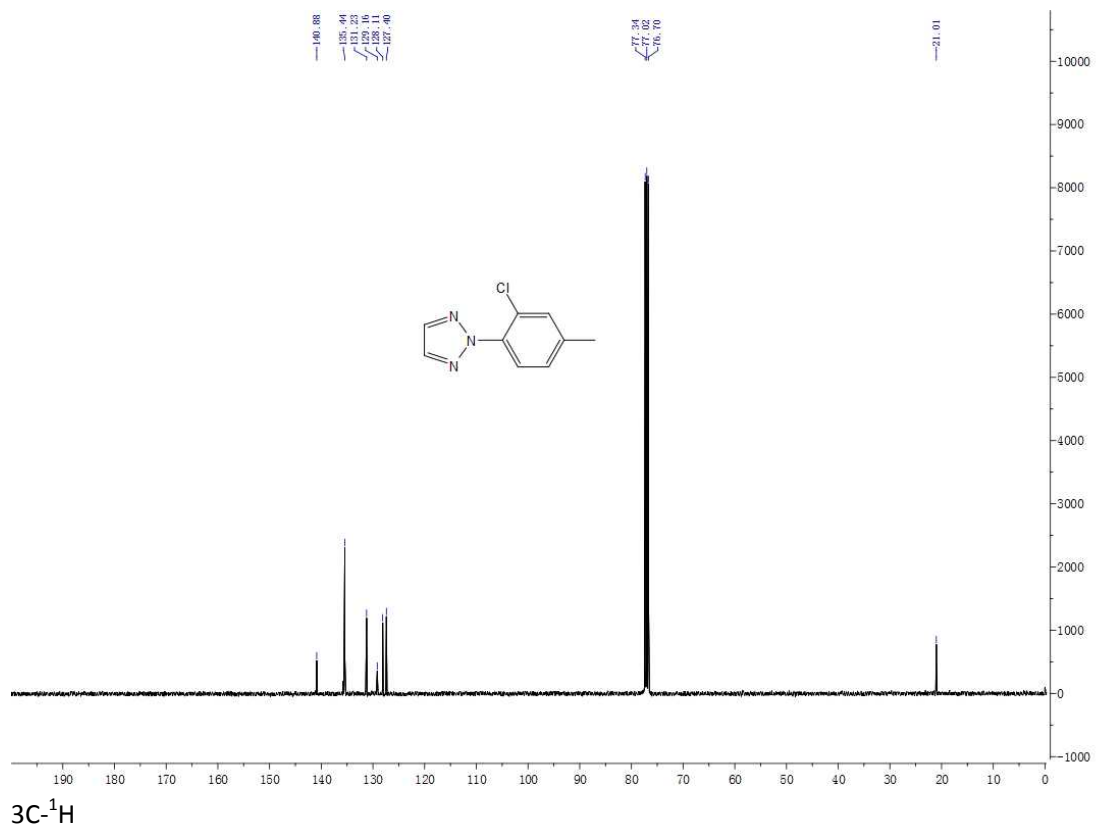

$^{13}\text{C}$

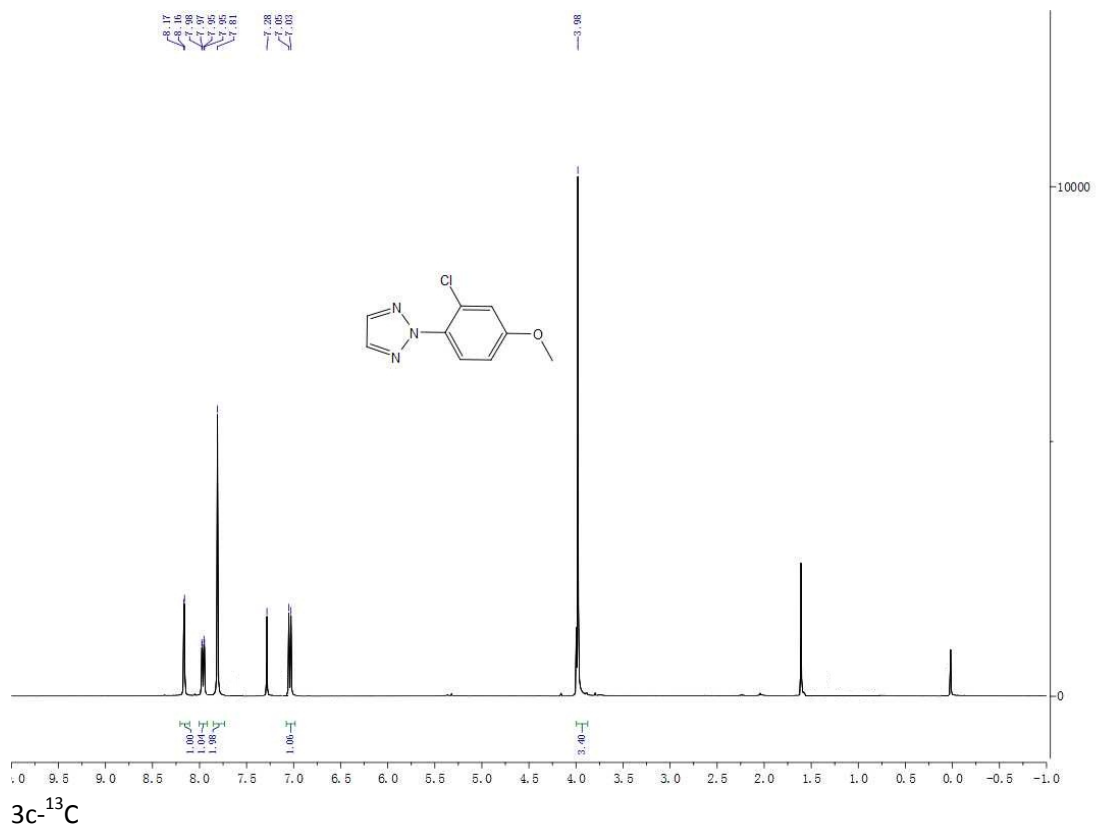

$^1\text{H}$

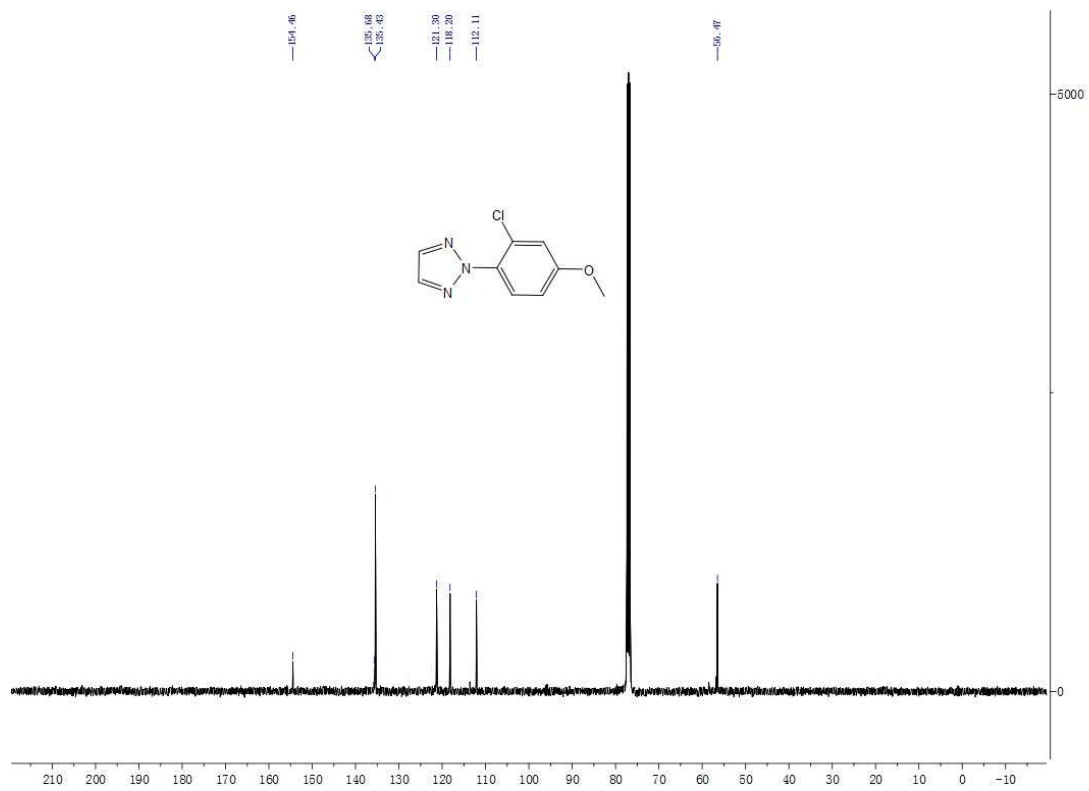

3d- $^1\text{H}$

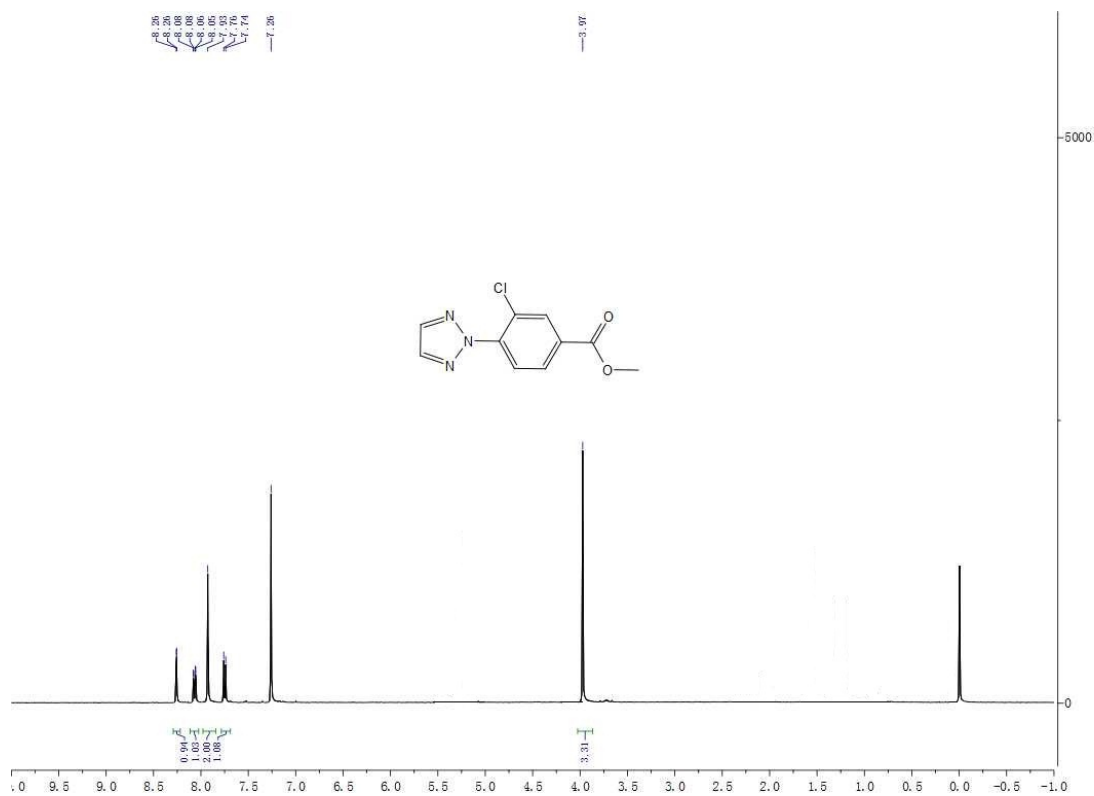

3d- $^{13}\text{C}$

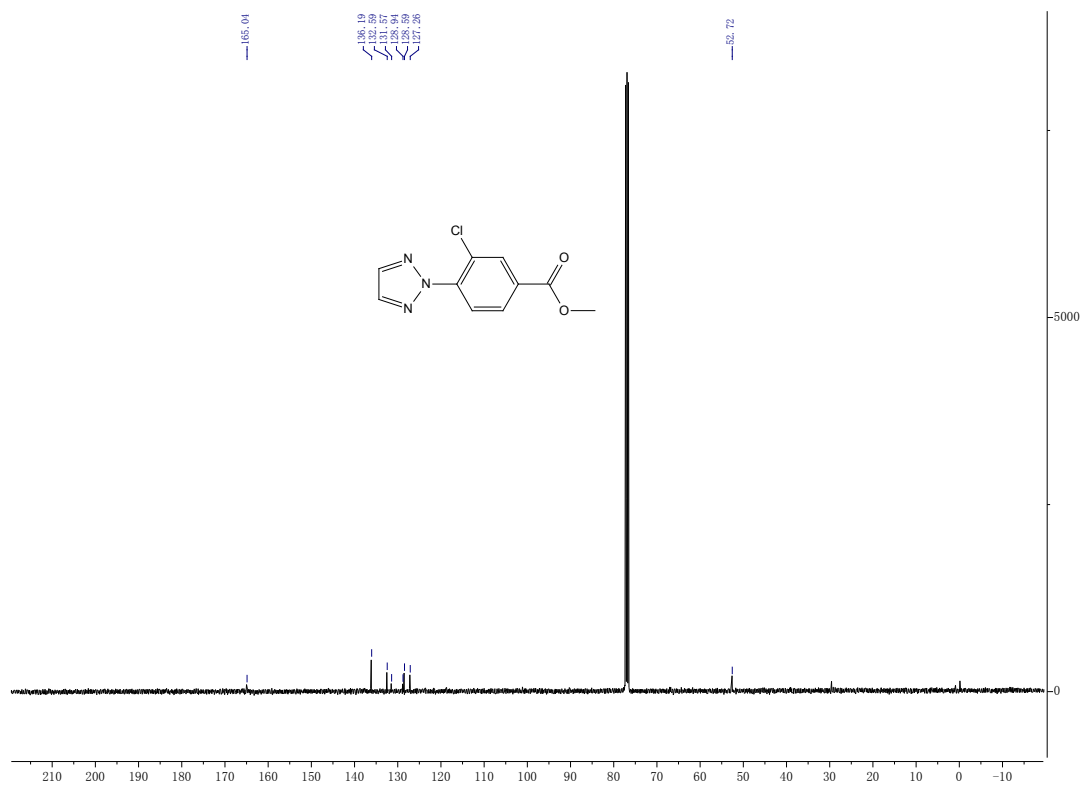

$3e^{-1}\text{H}$

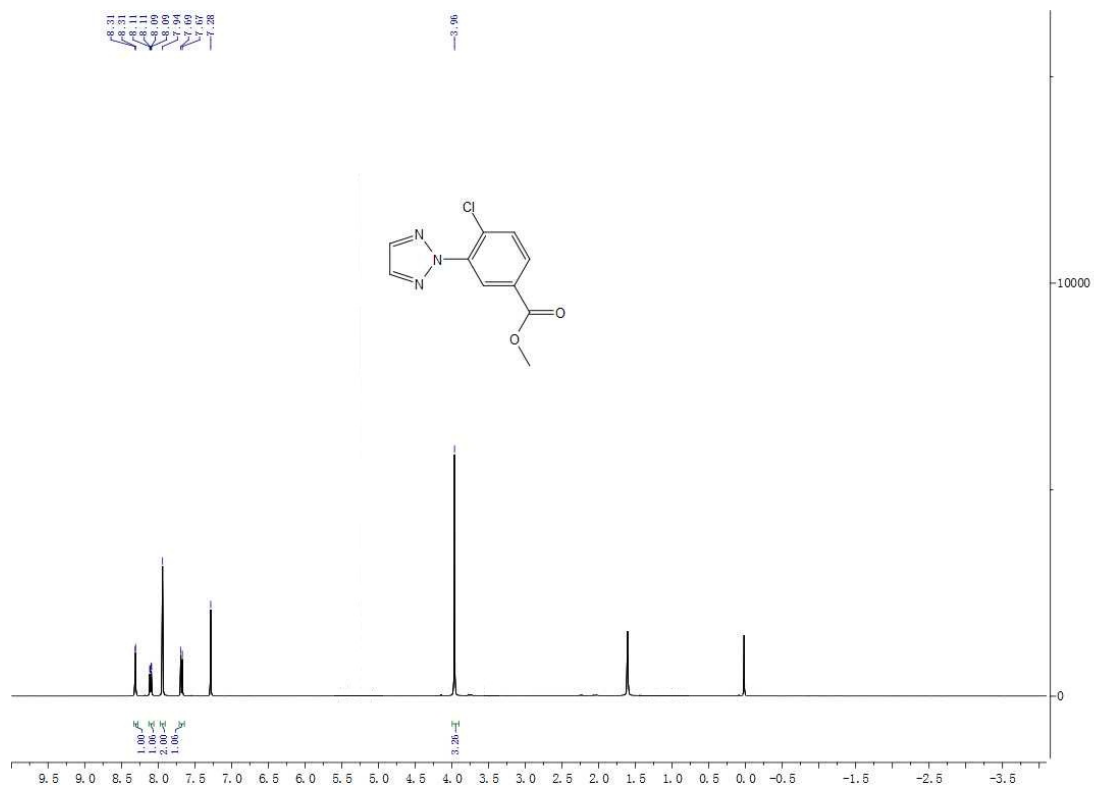

$3e^{-13}\text{C}$

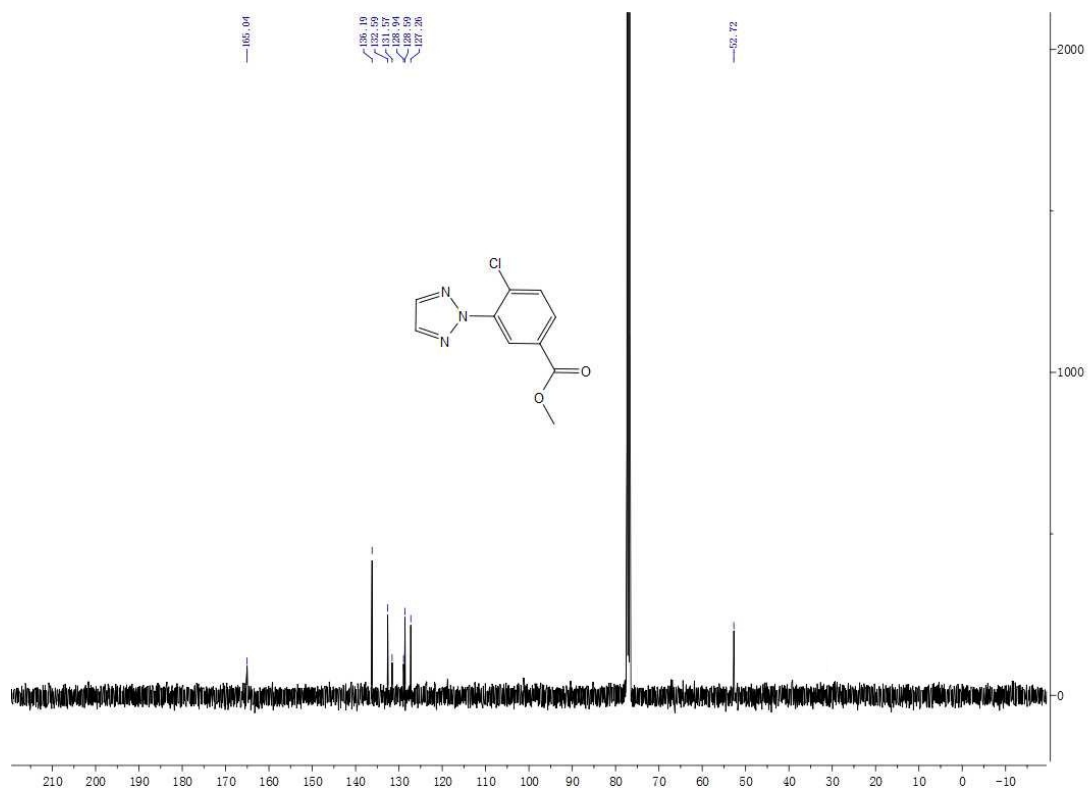

$3f$ - $^{13}\text{C}$

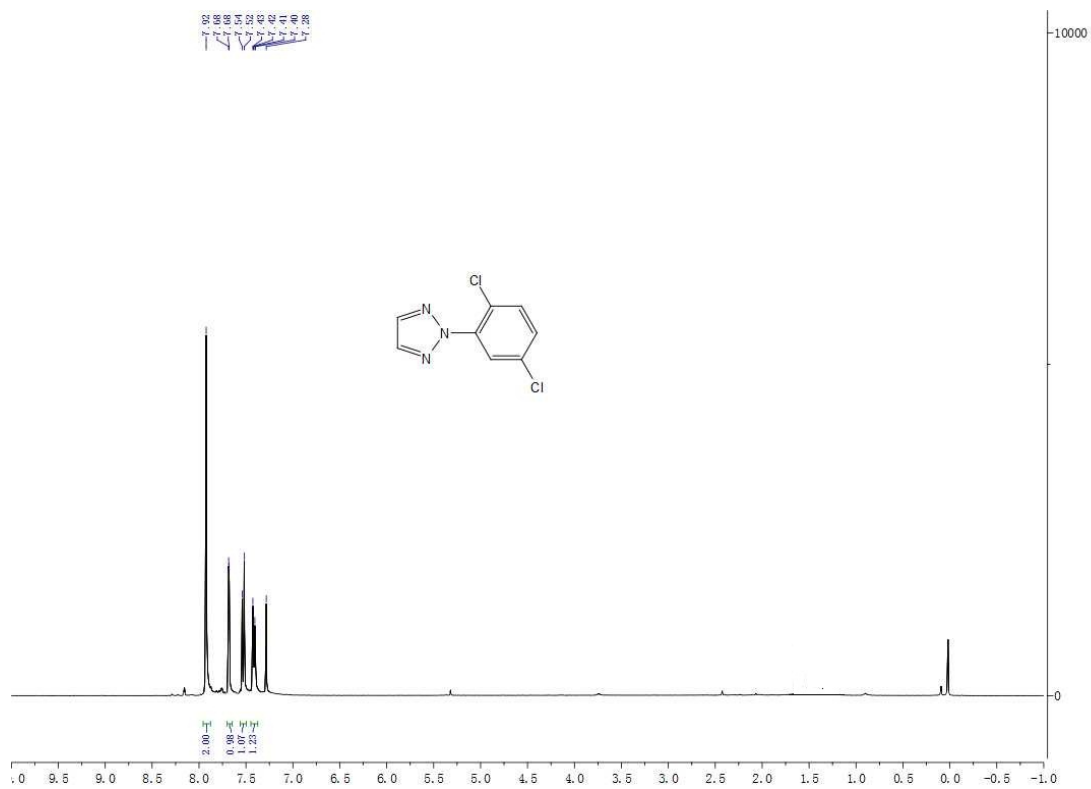

$3f$ - $^1\text{H}$

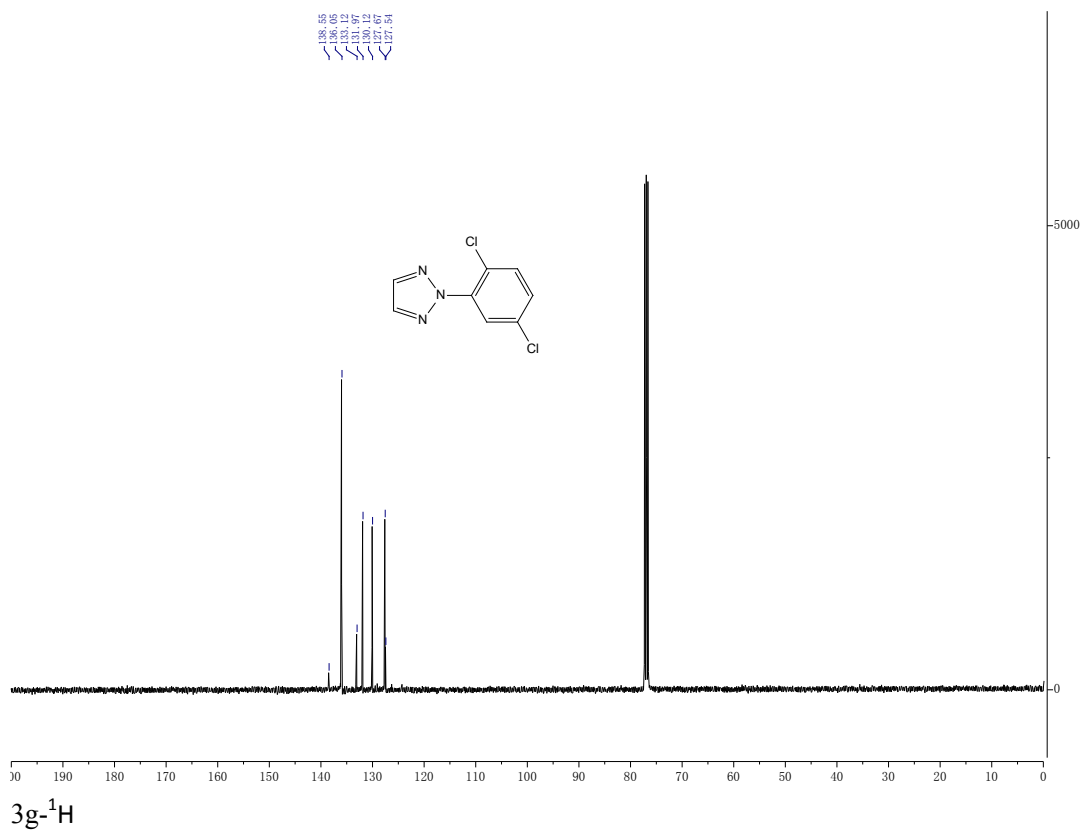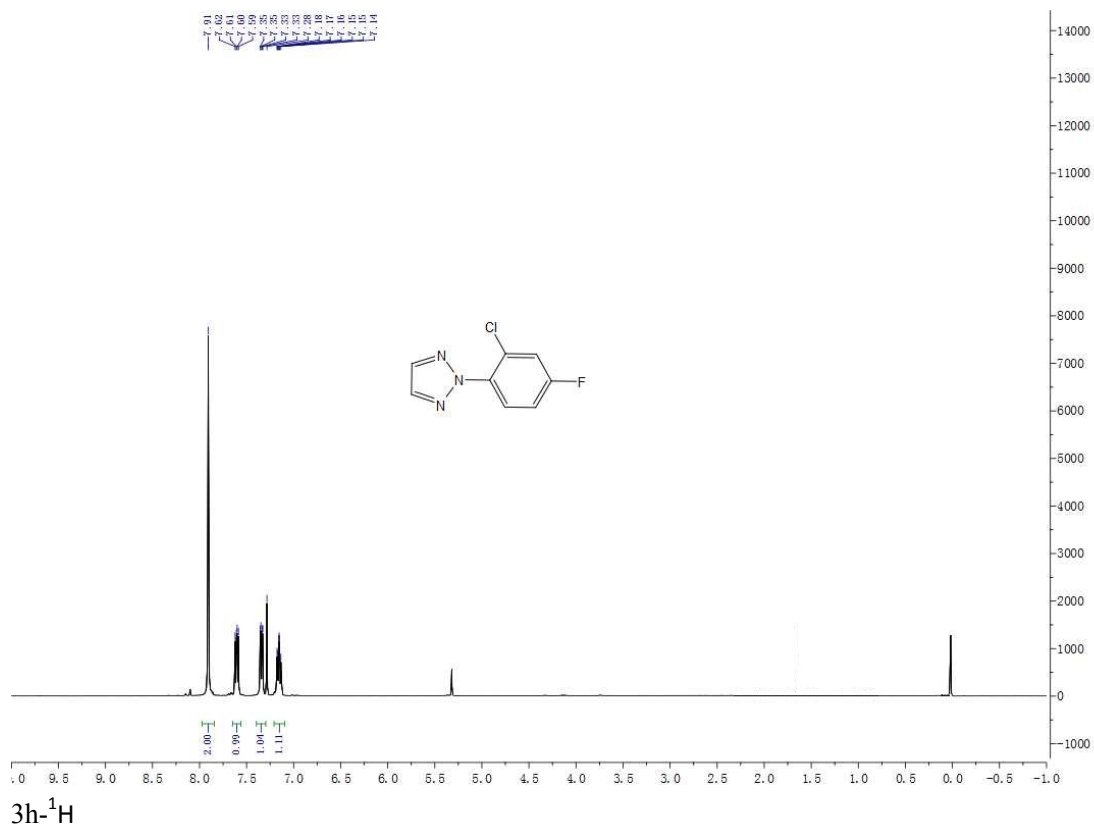

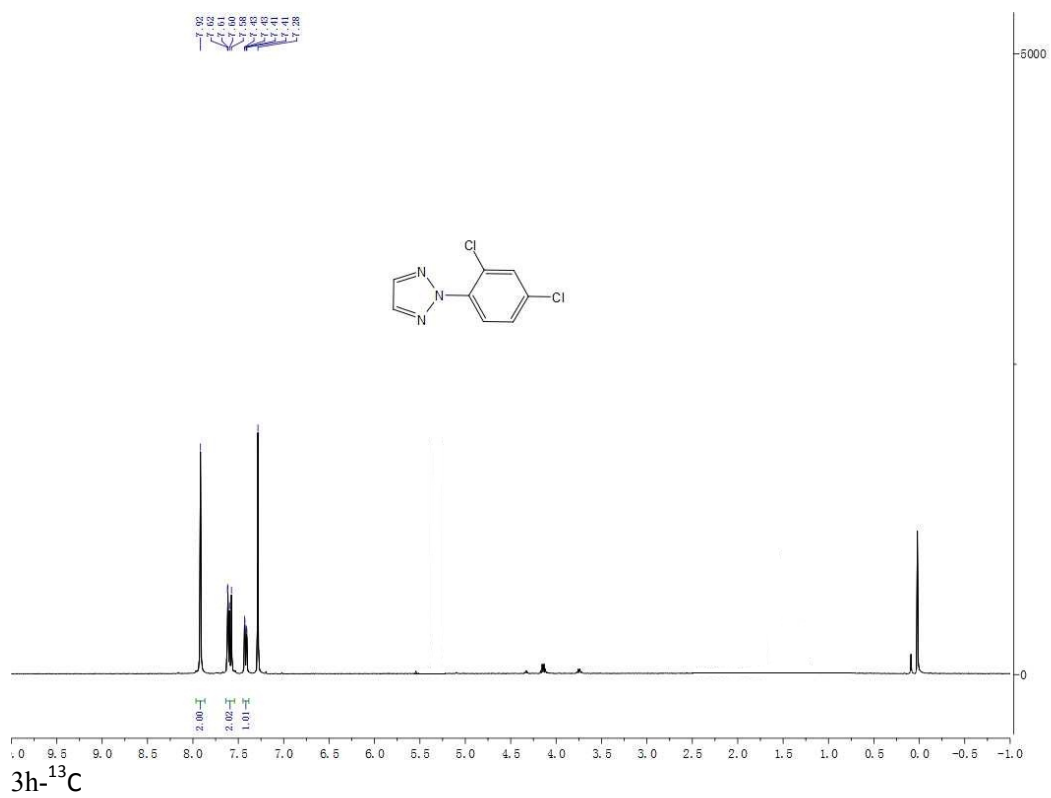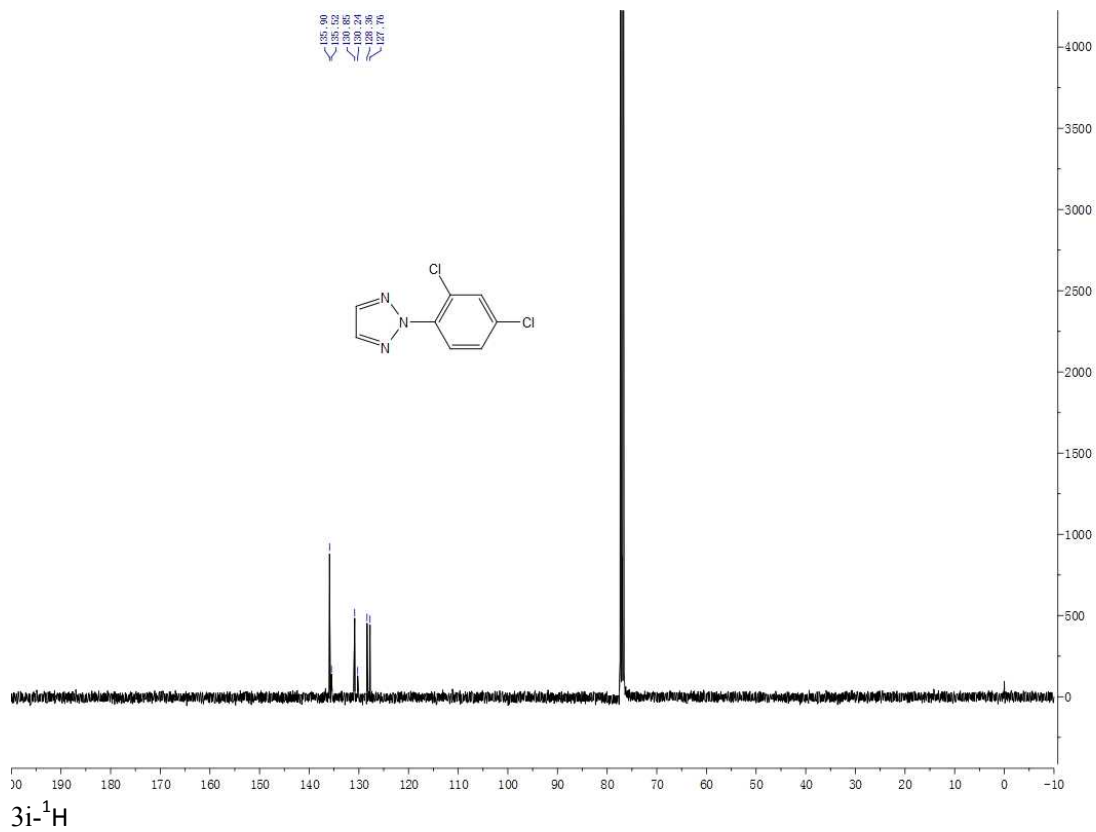

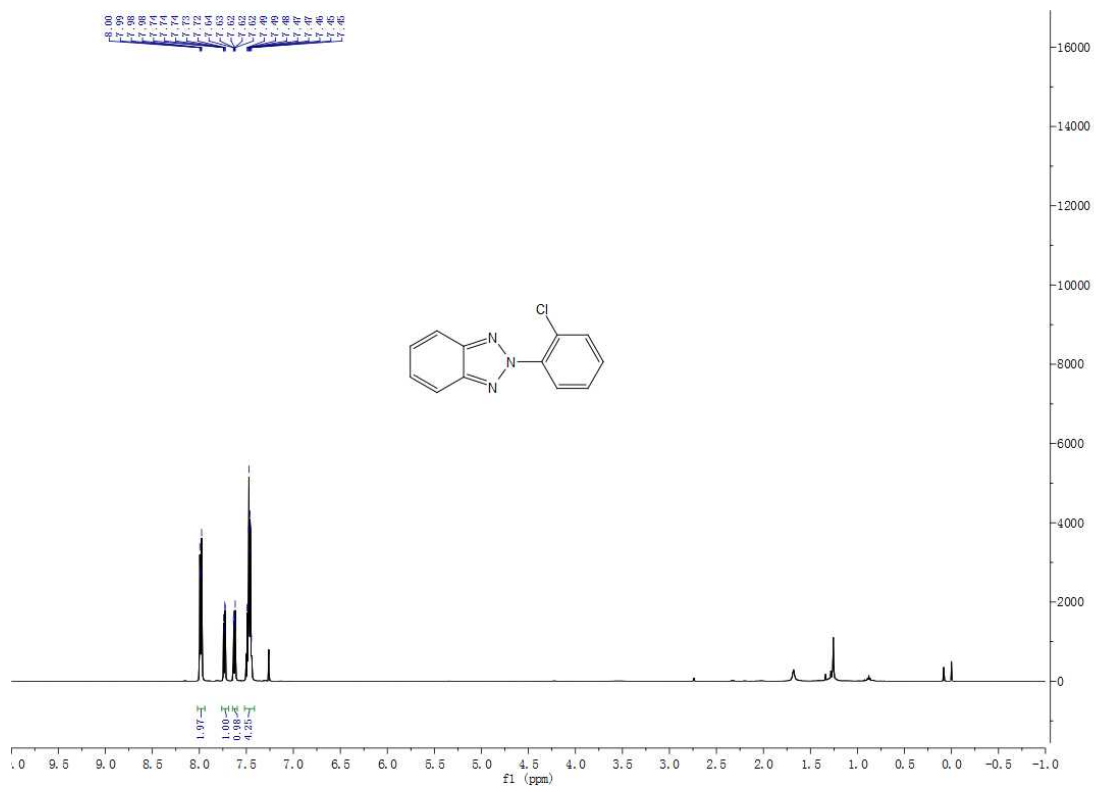

3i-<sup>13</sup>C

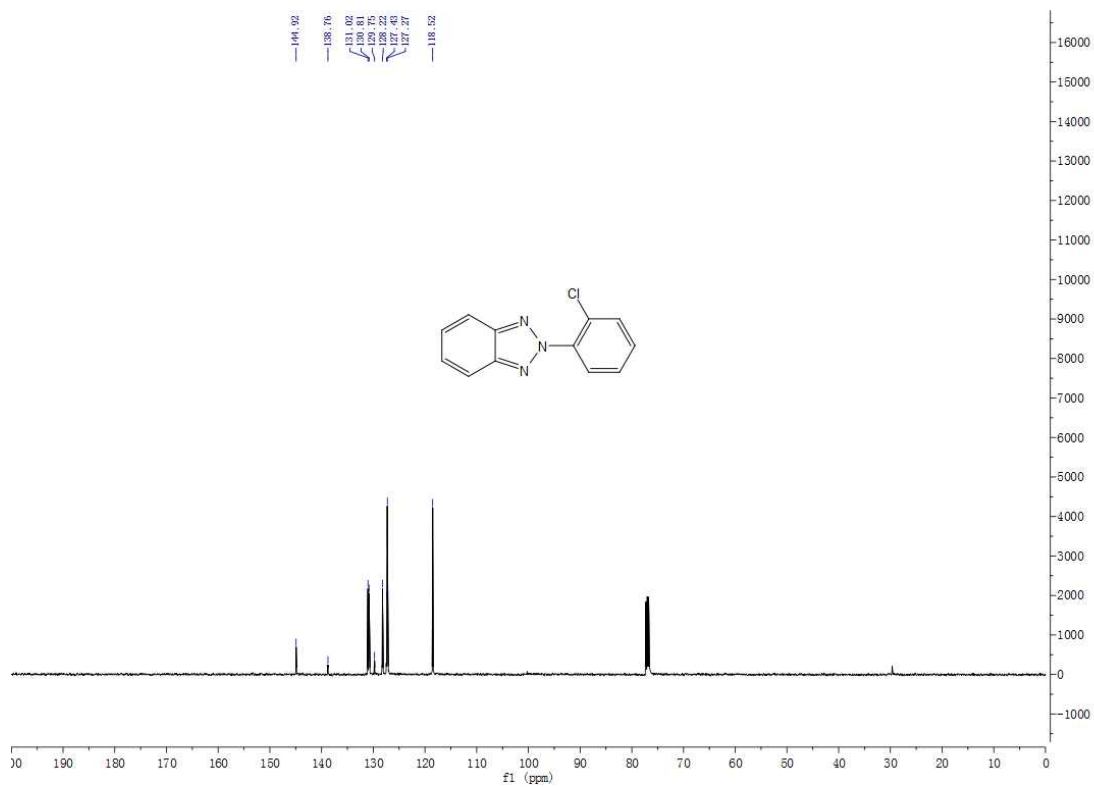

4a-<sup>1</sup>H



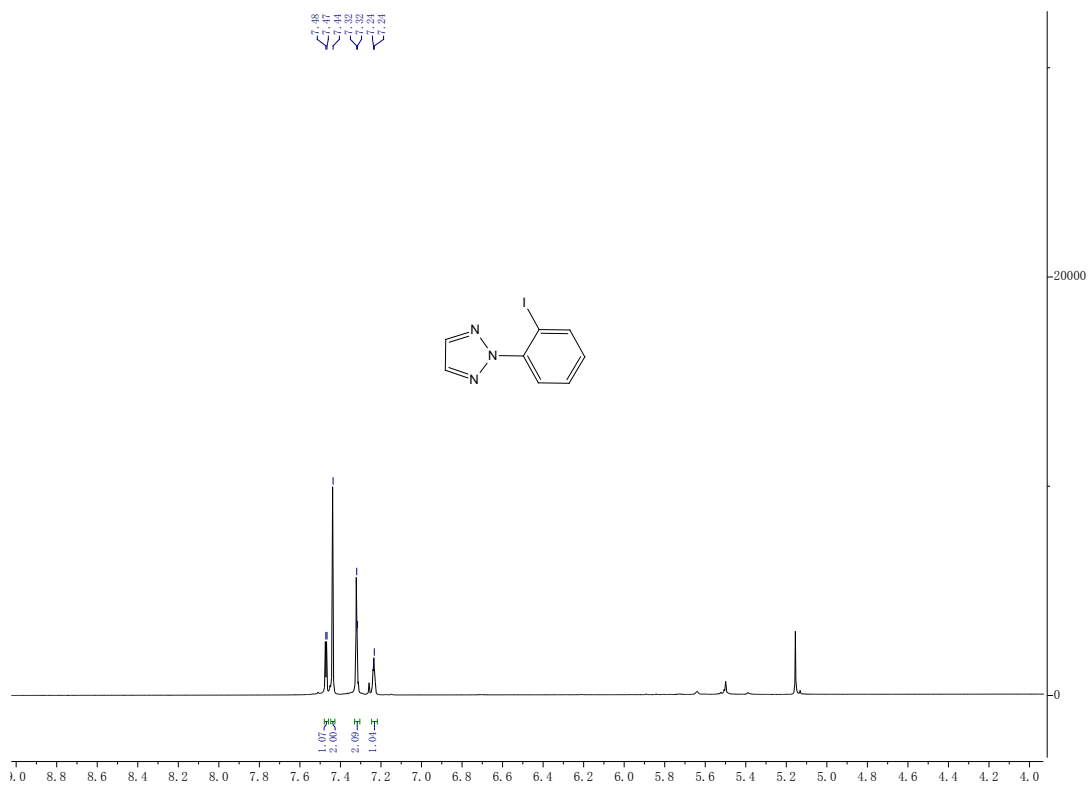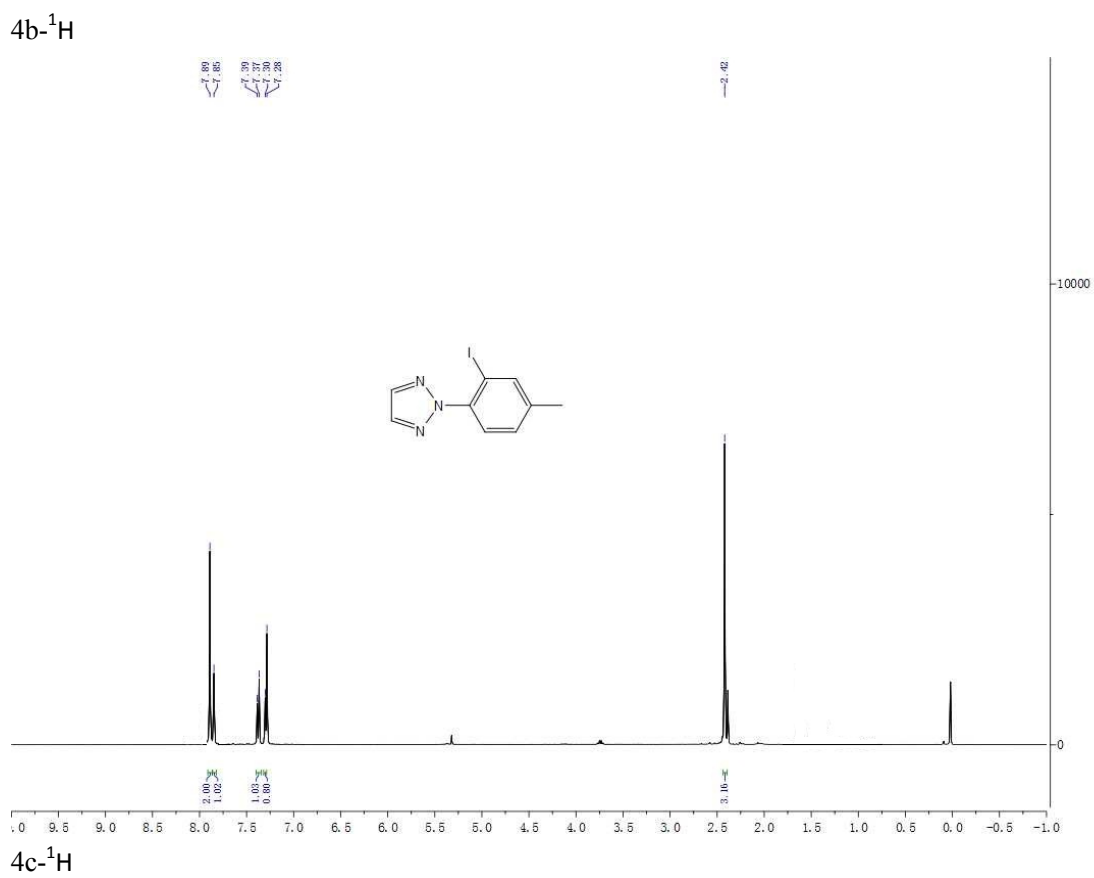

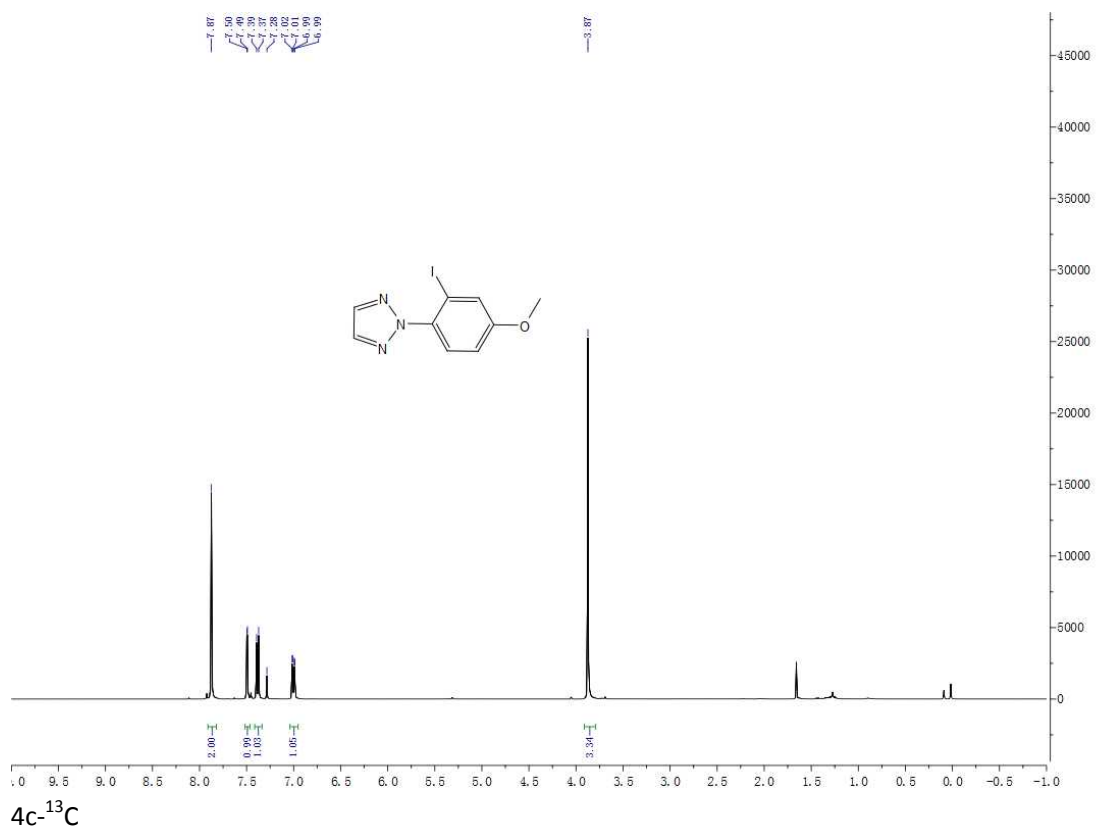

4c- $^{13}\text{C}$

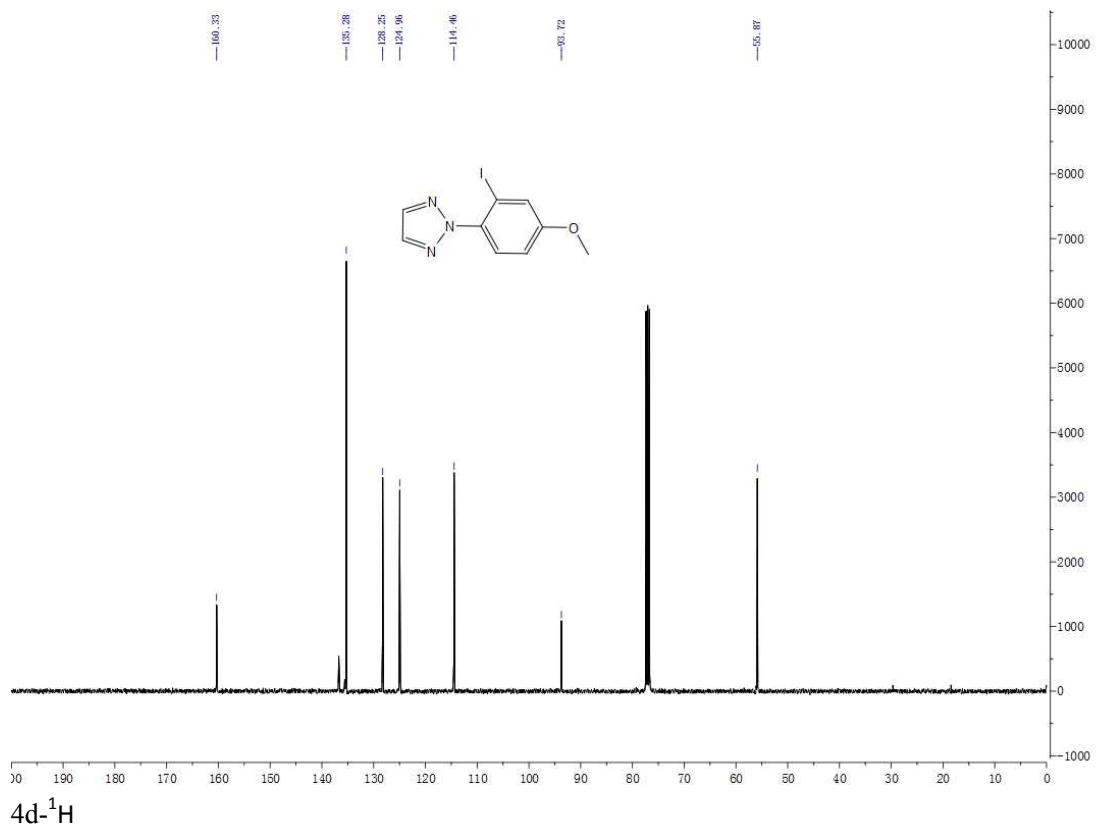

4d- $^1\text{H}$

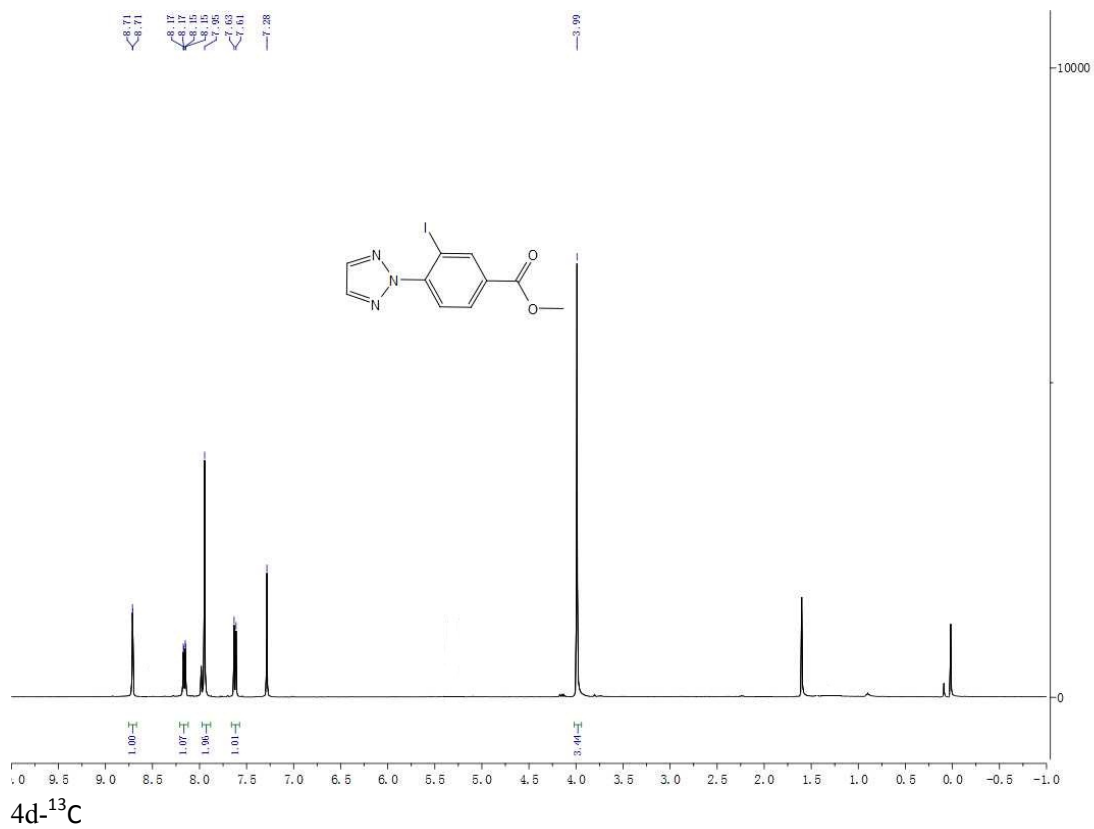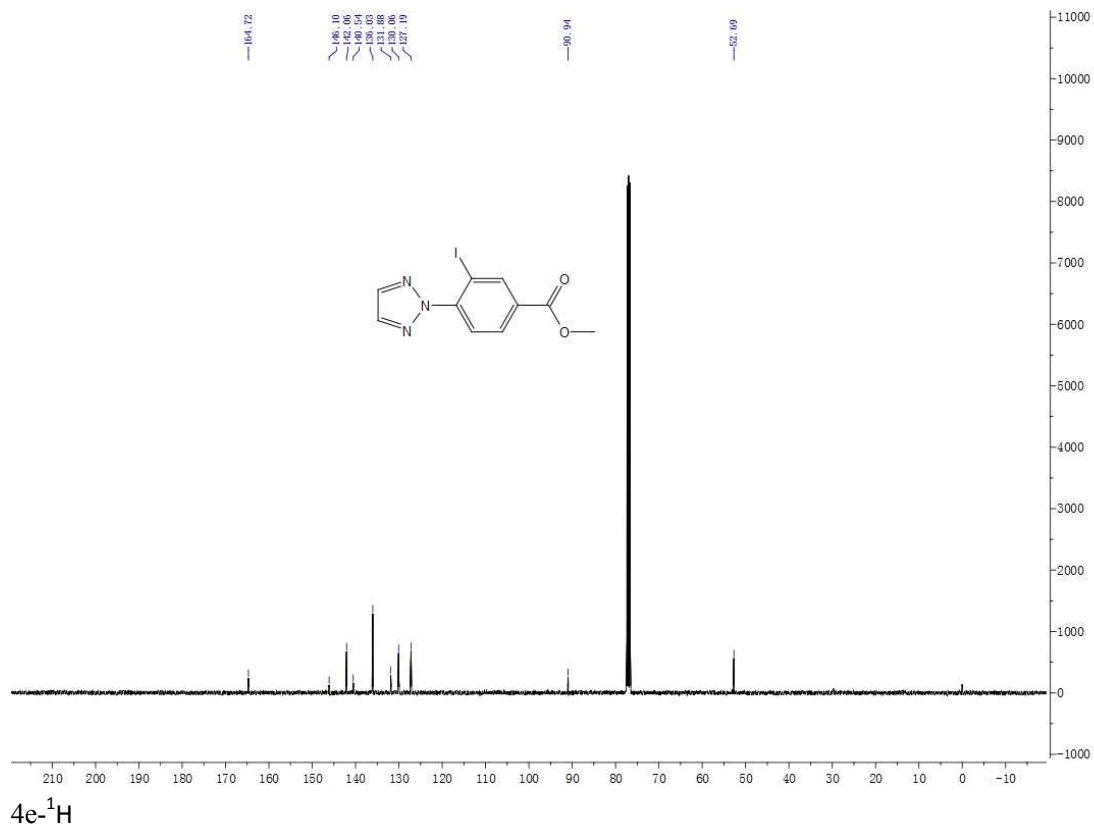

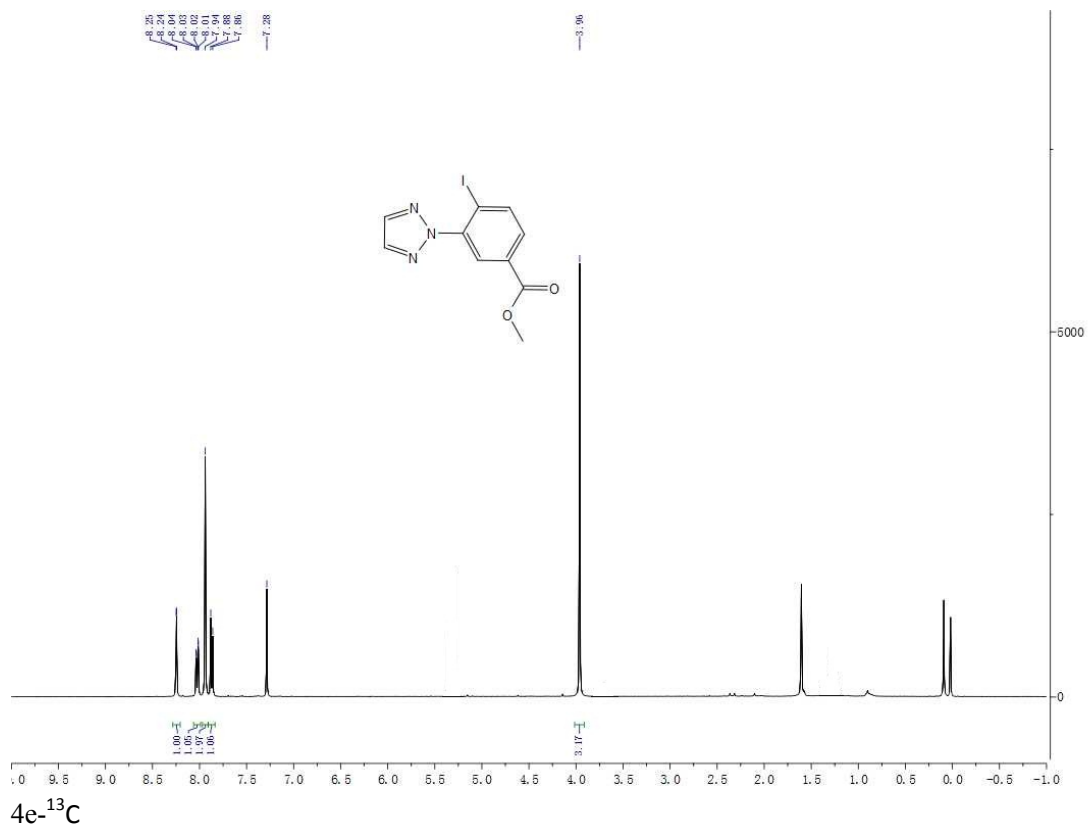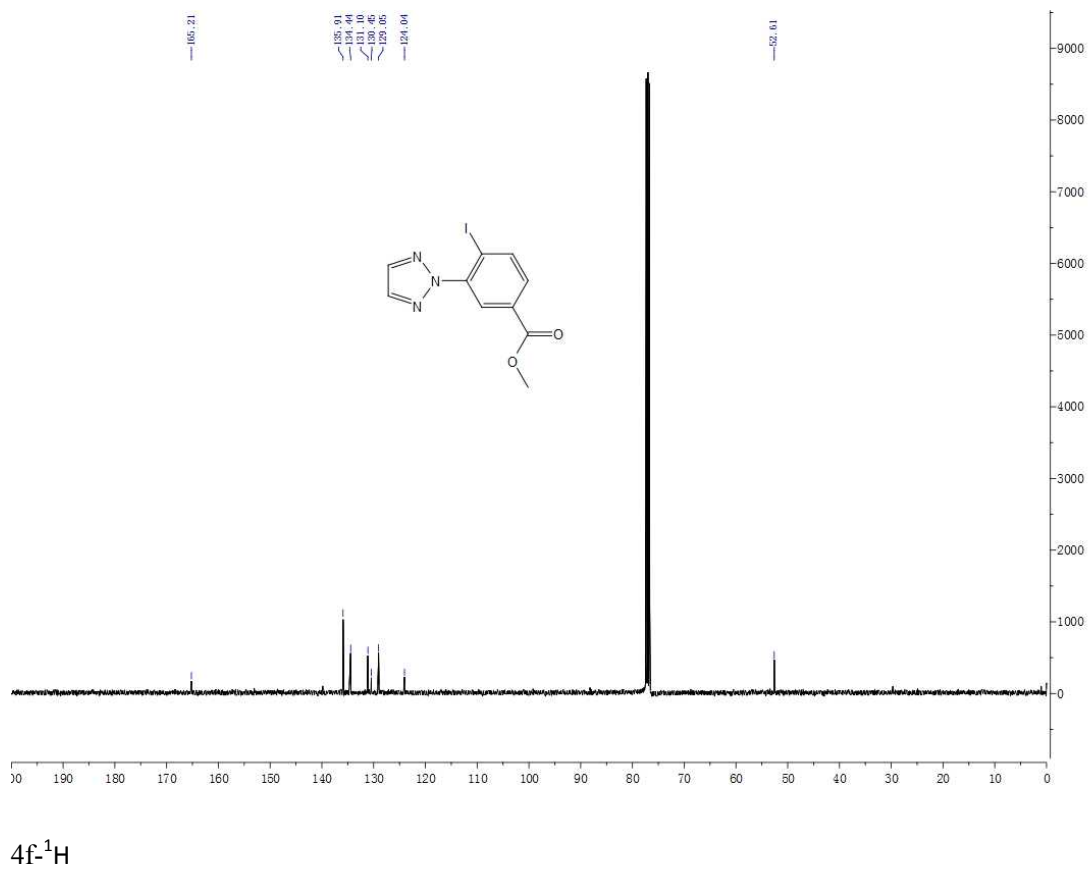

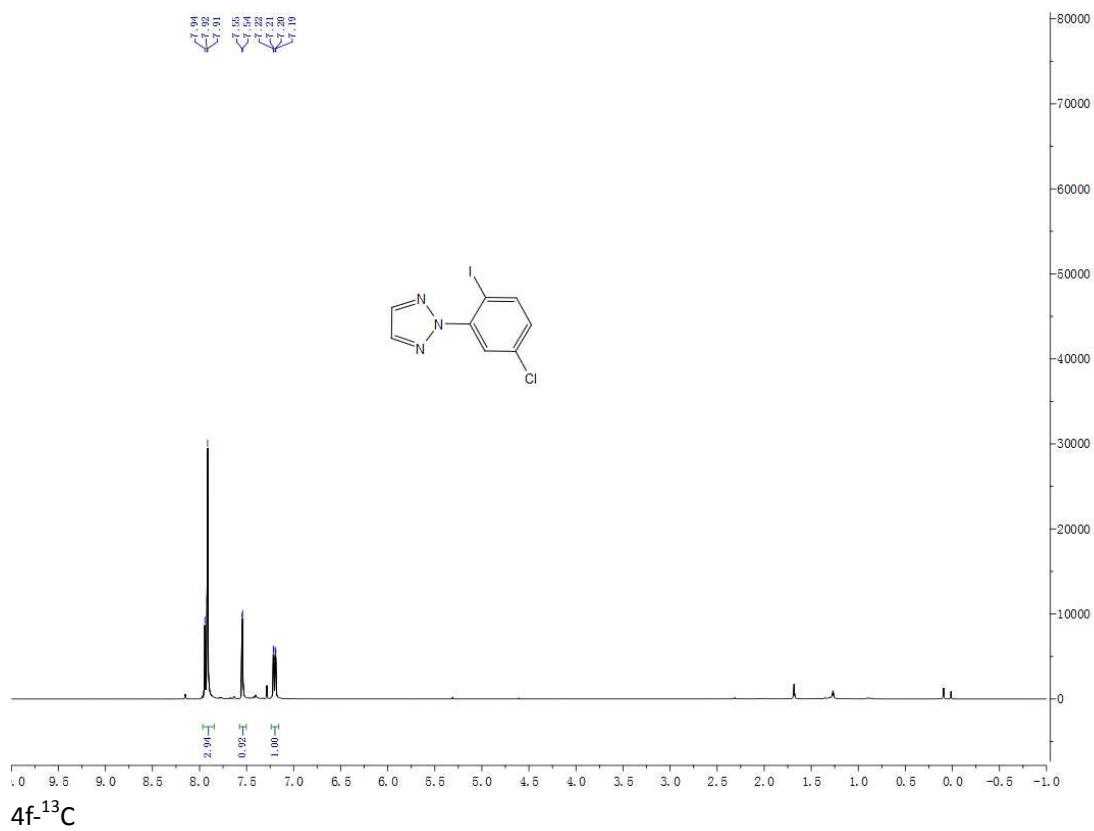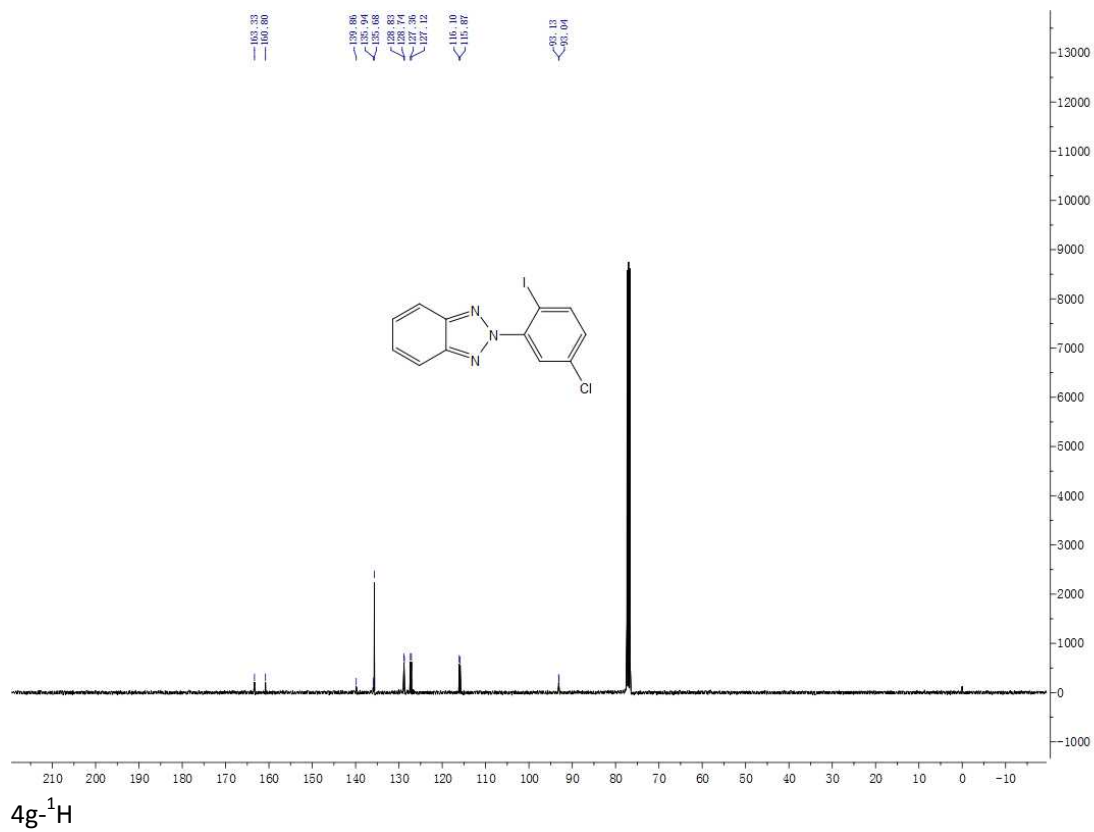

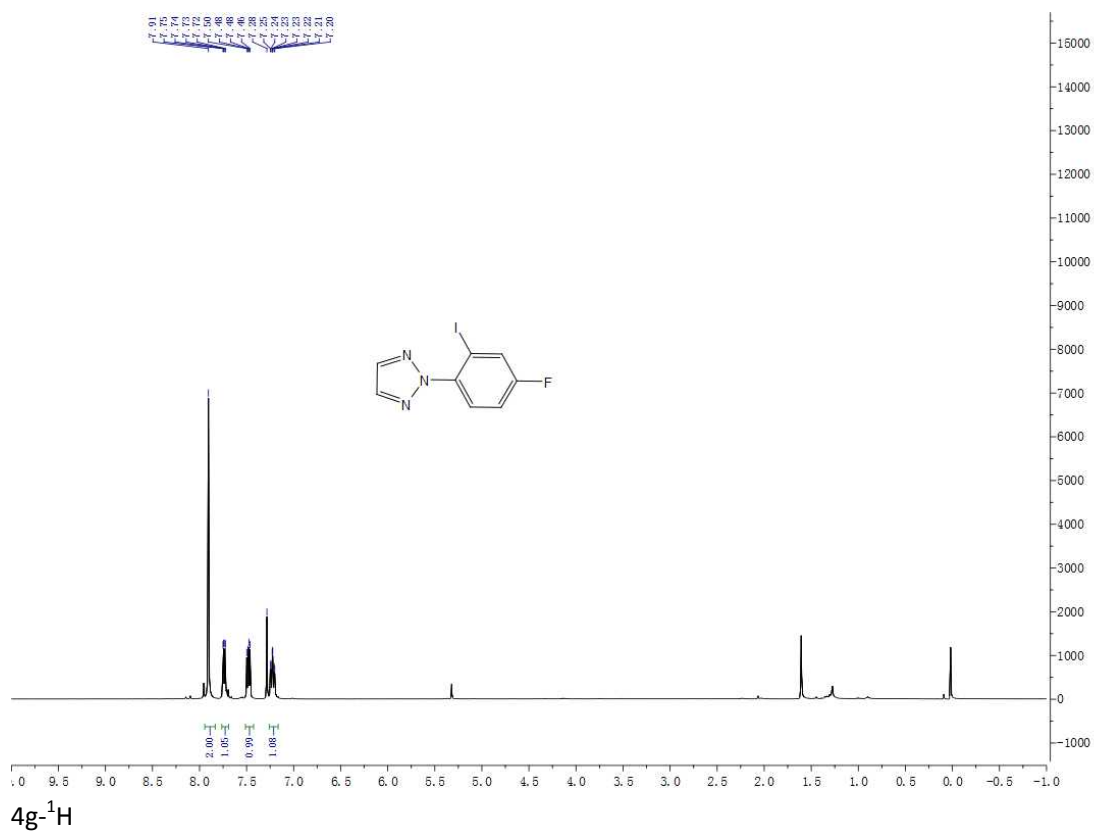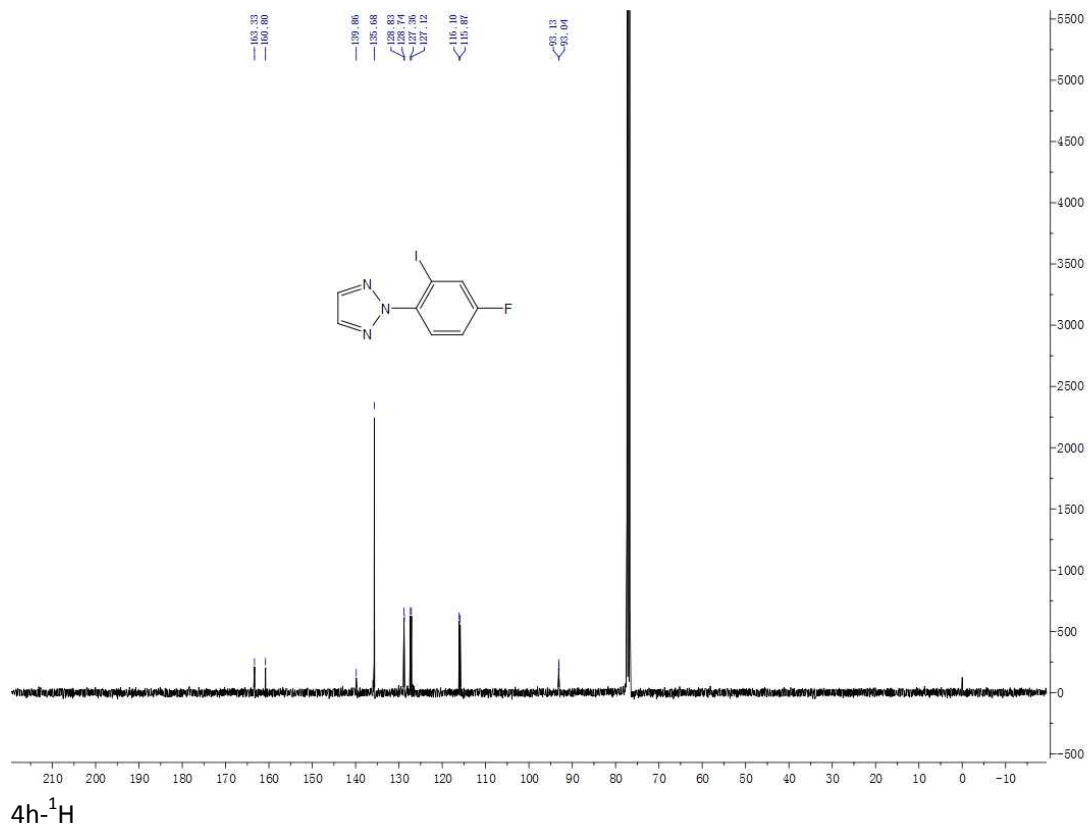

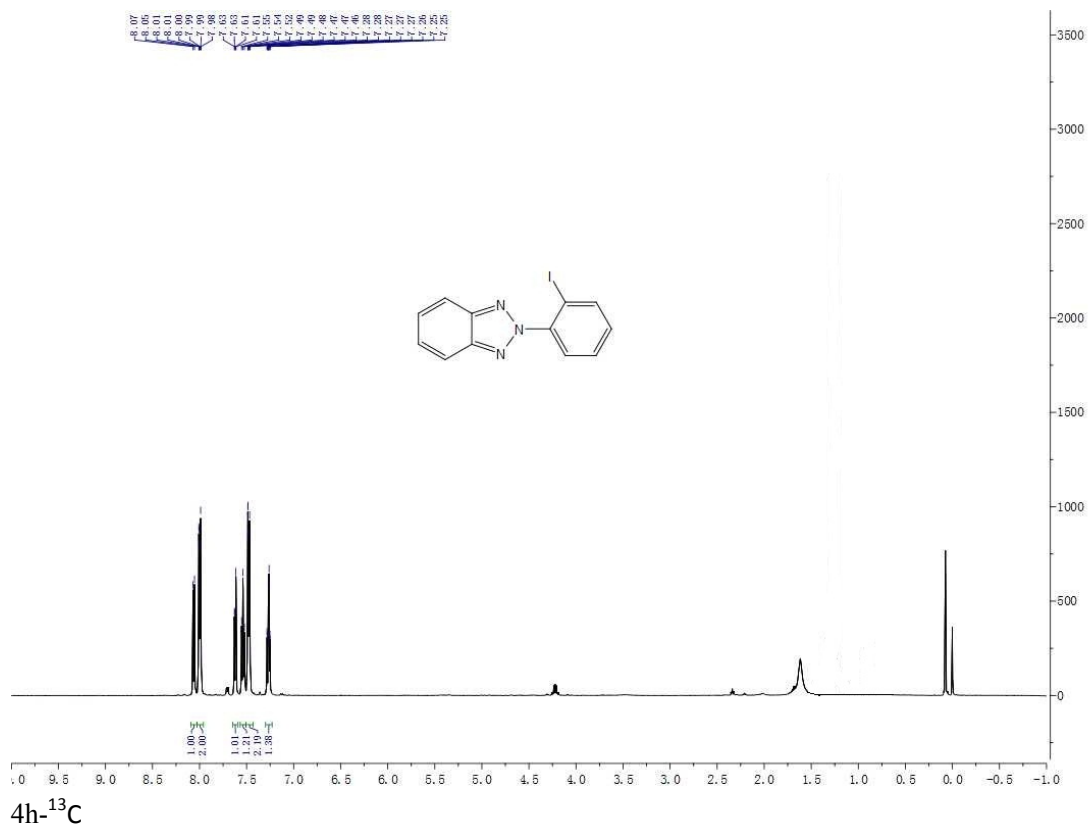

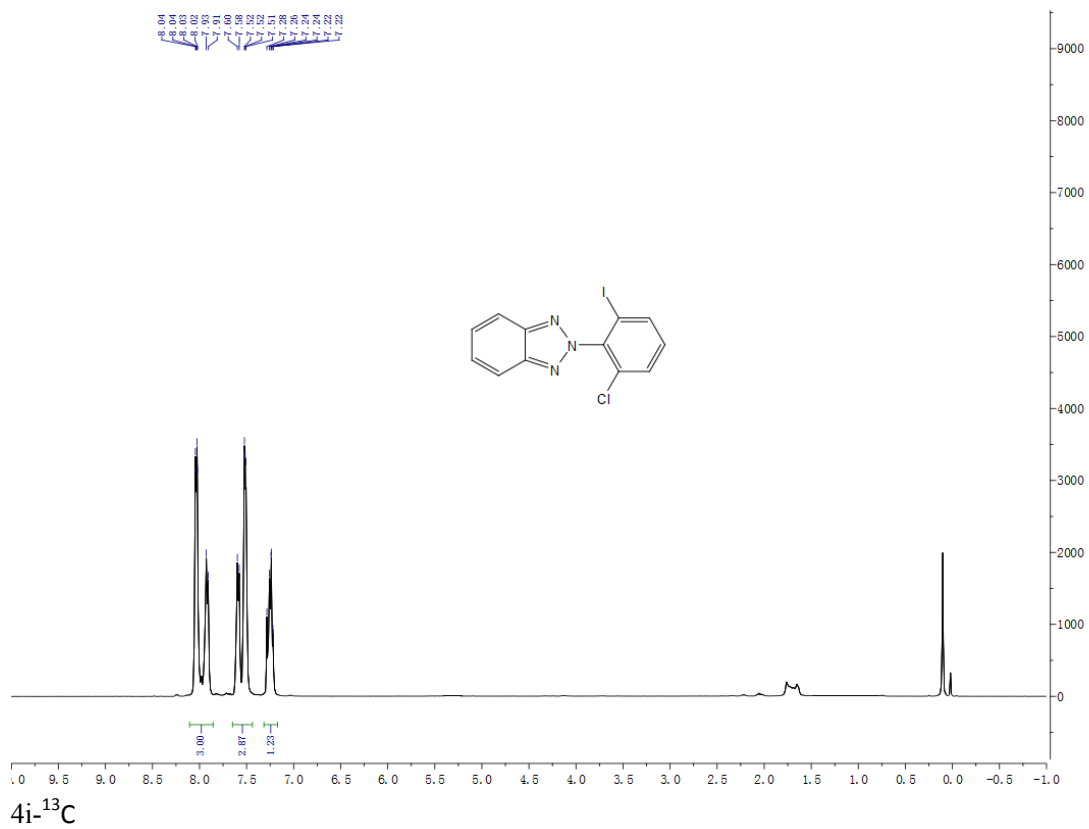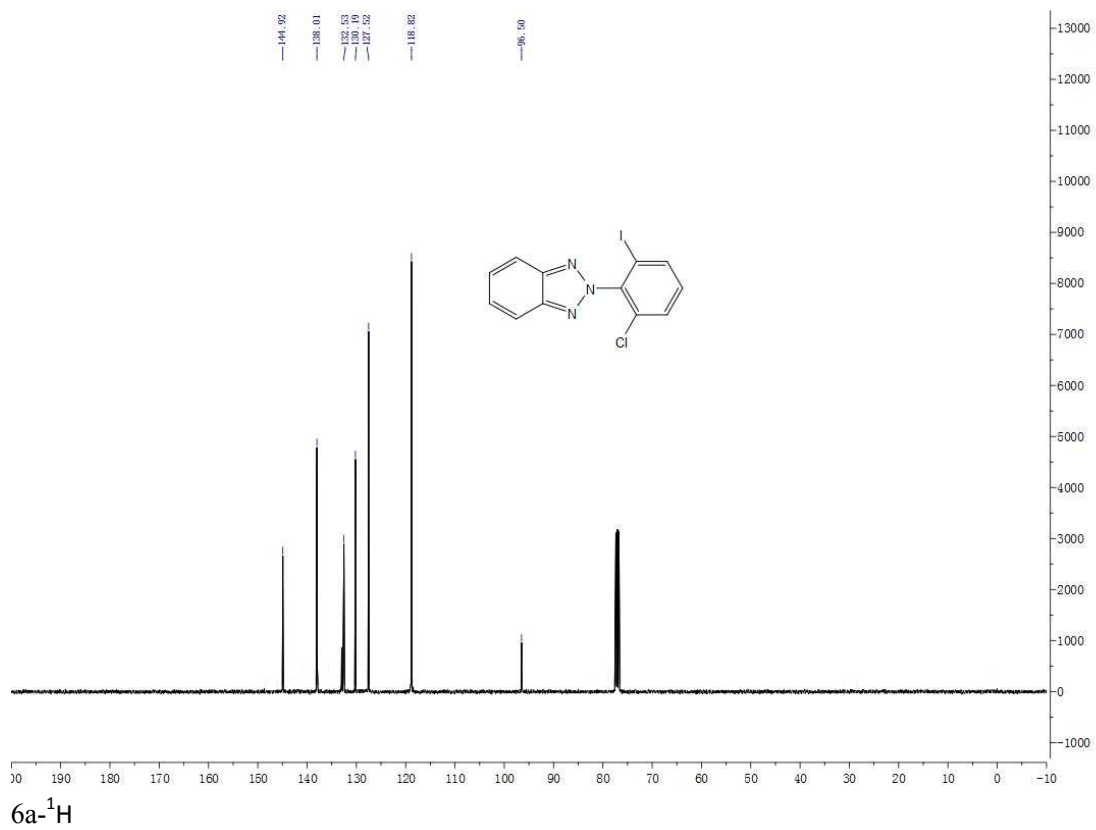





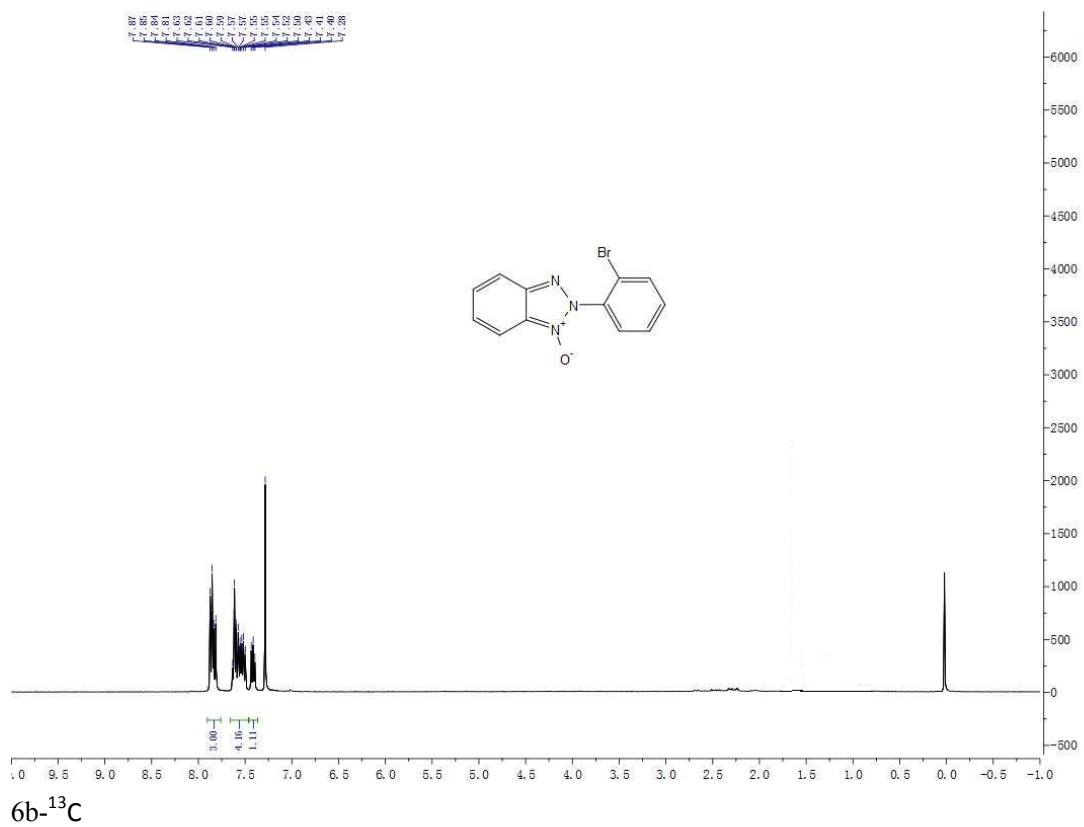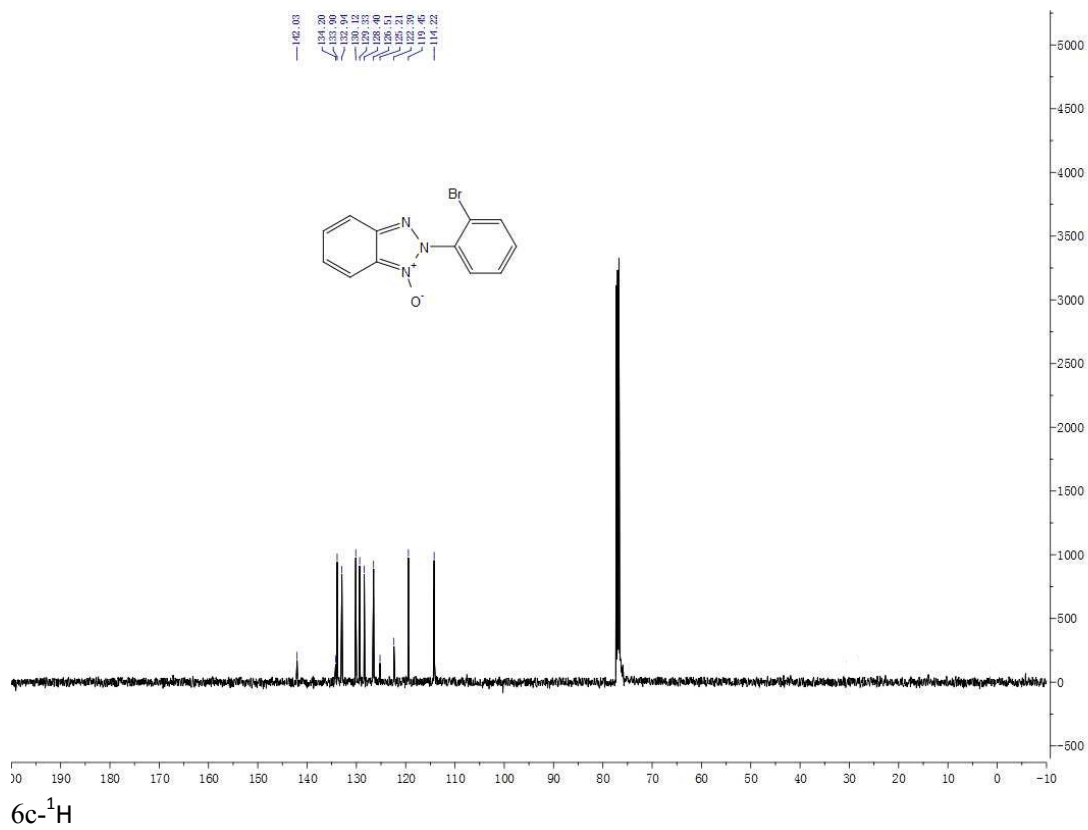

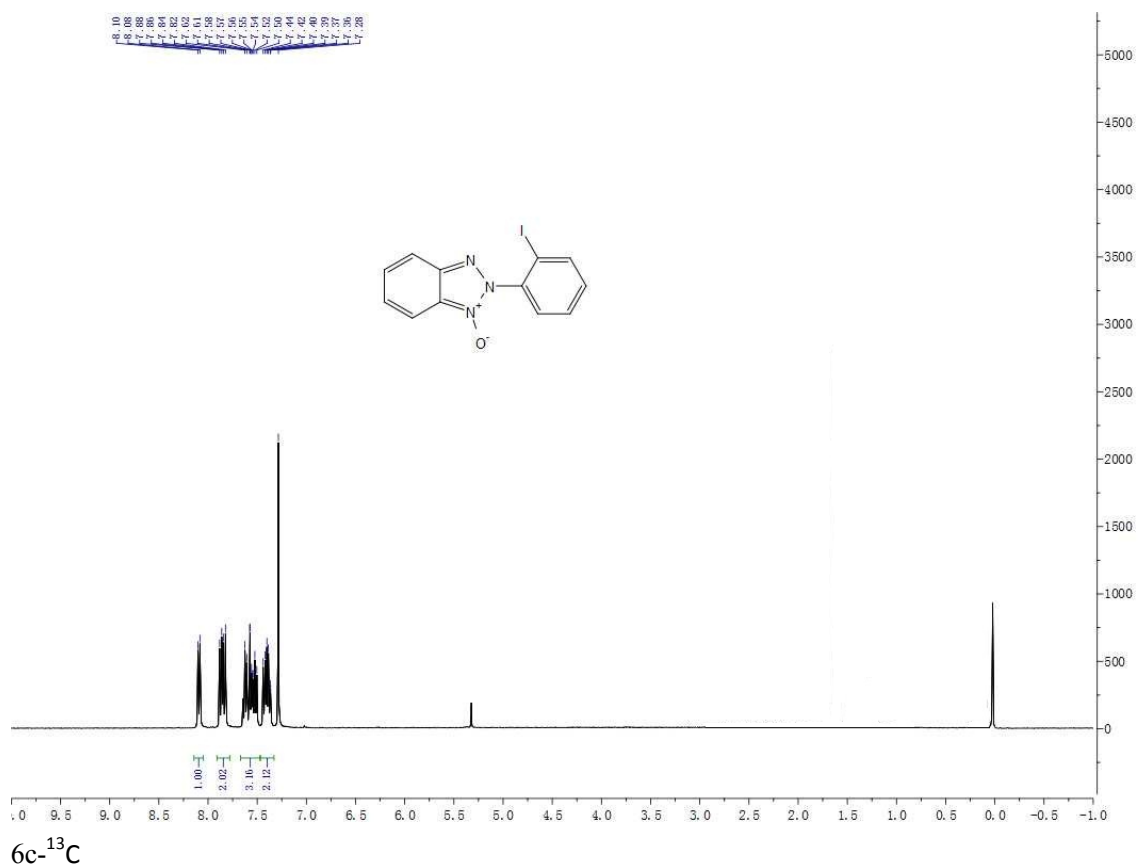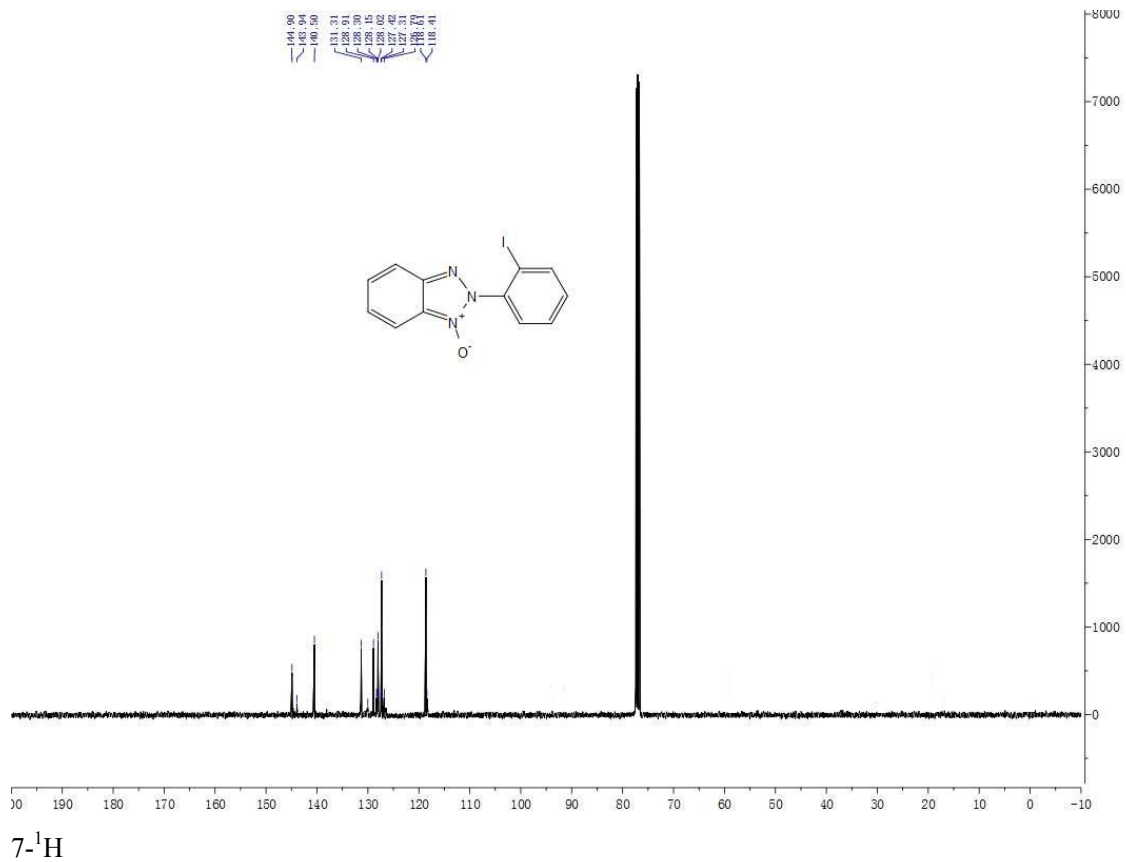

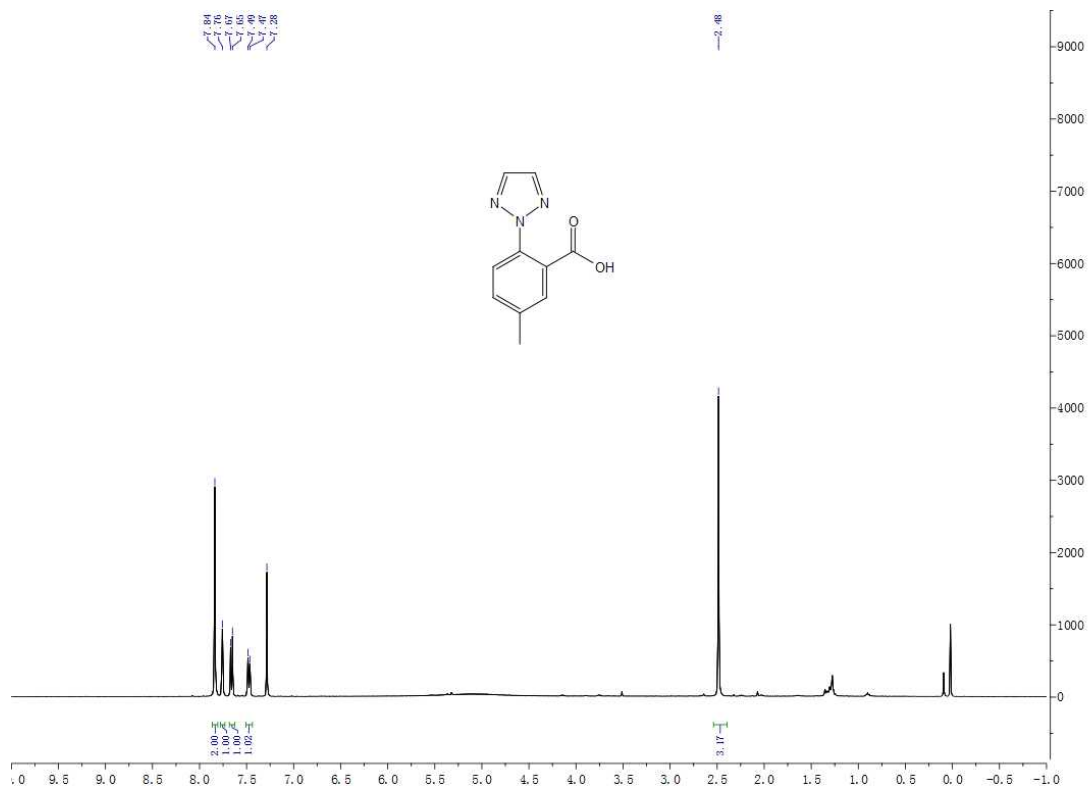

$7-^{13}\text{C}$

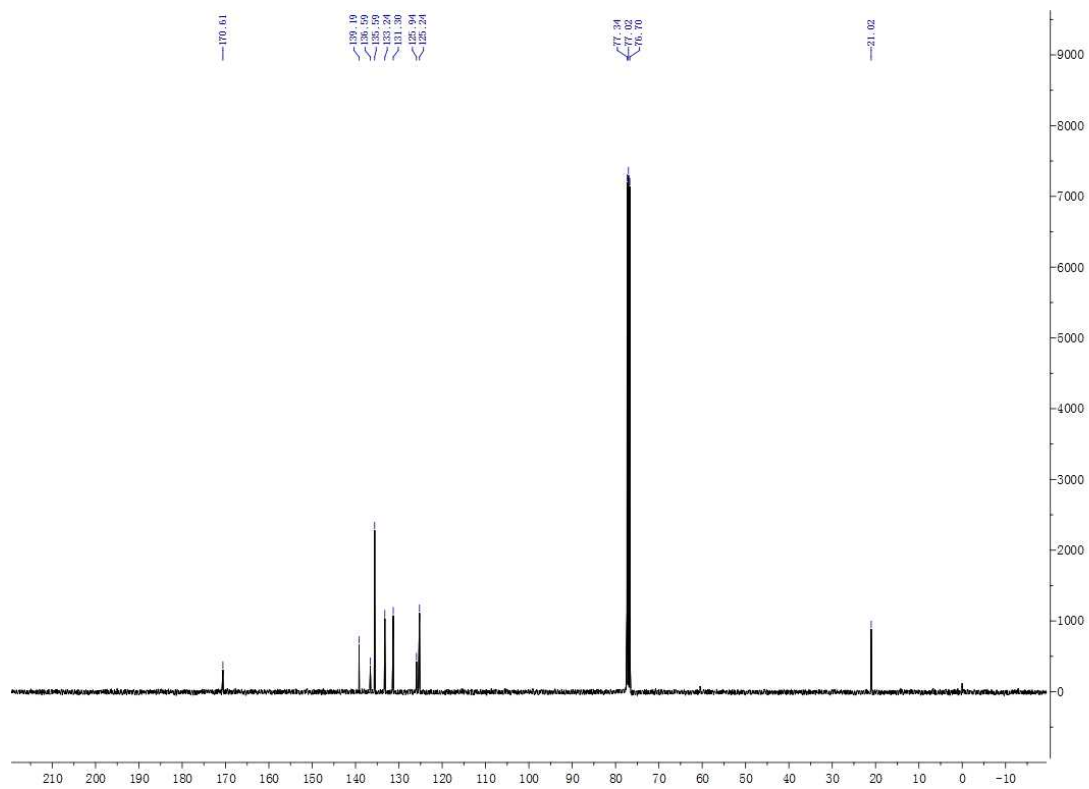

Supplement: c3ob41558a.pdf [file c3ob41558a.pdf]
